# Supplementary material for: Development, Translation and Validation of Enhanced Asian Rome III Questionnaires for Diagnosis of Functional Bowel Diseases in Major Asian Languages: A Rome Foundation-Asian Neurogastroenterology and Motility Association Working Team Report
Source: PubMed Central journal article supplement — J Neurogastroenterol Motil. 2015 Jan;21(1):83–92. doi: 10.5056/jnm14045 (PMC4288097; doi:10.5056/jnm14045), 2015-01
Supplement: JNM-21-83-suppl.pdf [file JNM-21-83-suppl.pdf]

**Supplementary Table 1**

**EAR3Q**

Date: \_\_\_/\_\_\_/\_\_\_  
dd mm yy

Initials: \_\_\_\_\_

|                                                                                                                                                                                   |                                                                                                                                                                                                                                                                                                                           |                                  |
|-----------------------------------------------------------------------------------------------------------------------------------------------------------------------------------|---------------------------------------------------------------------------------------------------------------------------------------------------------------------------------------------------------------------------------------------------------------------------------------------------------------------------|----------------------------------|
| <p>1. In the last 3 months, how often did you have a feeling of a lump, fullness or something stuck in your throat?</p>                                                           | <p>0 Never →→→→→<br/>                 1 Less than one day a month<br/>                 2 One day a month<br/>                 3 Two to three days a month<br/>                 4 One day a week<br/>                 5 More than one day a week<br/>                 6 Every day</p>                                      | <p><i>Skip to question 4</i></p> |
| <p>2. Have you had this feeling 6 months or longer?</p>                                                                                                                           | <p>0 No<br/>                 1 Yes</p>                                                                                                                                                                                                                                                                                    |                                  |
| <p>3. Does this feeling occur between meals (when you are not eating)?</p> <p>a. Does this feeling occur in relation to meals?</p> <p>b. Usually how severe was this feeling?</p> | <p>0 No<br/>                 1 Yes</p> <p>0 No<br/>                 1 Before meals<br/>                 2 During meals<br/>                 3 After meals</p> <p>1 Very mild<br/>                 2 Mild<br/>                 3 Moderate<br/>                 4 Severe<br/>                 5 Very severe</p>             |                                  |
| <p>4. When you are eating or drinking does it hurt to swallow?</p> <p>a. When you are eating or drinking, is there feeling of pain or discomfort when swallowing?</p>             | <p>0 Never or rarely<br/>                 1 Sometimes<br/>                 2 Often<br/>                 3 Most of the time<br/>                 4 Always</p> <p>0 Never or rarely<br/>                 1 Sometimes<br/>                 2 Often<br/>                 3 Most of the time<br/>                 4 Always</p> |                                  |
| <p>5. In the last 3 months, how often did you have pain or discomfort in the middle of your chest (not related to heart problems)?</p>                                            | <p>0 Never →→→→→<br/>                 1 Less than one day a month<br/>                 2 One day a month<br/>                 3 Two to three days a month<br/>                 4 One day a week<br/>                 5 More than one day a week</p>                                                                       | <p><i>Skip to question 8</i></p> |

# EAR3Q

Date: \_\_\_/\_\_\_/\_\_\_  
dd mm yy

Initials: \_\_\_\_\_

|                                                                                                                         |                                                                                                                                                                   |                            |
|-------------------------------------------------------------------------------------------------------------------------|-------------------------------------------------------------------------------------------------------------------------------------------------------------------|----------------------------|
|                                                                                                                         | 6 Every day                                                                                                                                                       |                            |
| 6. Have you had this chest pain 6 months or longer?                                                                     | 0 No<br>1 Yes                                                                                                                                                     |                            |
| 7. When you had your chest pain, how often did it feel like burning?                                                    | 0 Never or rarely<br>1 Sometimes<br>2 Often<br>3 Most of the time<br>4 Always                                                                                     |                            |
| 8. In the last 3 months, how often did you have heartburn (a burning discomfort or burning pain in your chest)?         | 0 Never →→→→→<br>1 Less than one day a month<br>2 One day a month<br>3 Two to three days a month<br>4 One day a week<br>5 More than one day a week<br>6 Every day | <i>Skip to question 10</i> |
| 9. Have you had this heartburn (burning pain or discomfort in the chest) 6 months or longer?                            | 0 No<br>1 Yes                                                                                                                                                     |                            |
| 10. In the last 3 months, how often did food or drinks get stuck after swallowing or go down slowly through your chest? | 0 Never →→→→→<br>1 Less than one day a month<br>2 One day a month<br>3 Two to three days a month<br>4 One day a week<br>5 More than one day a week<br>6 Every day | <i>Skip to question 13</i> |
| 11. Was the symptom of food sticking associated with heartburn?                                                         | 0 Never or rarely<br>1 Sometimes<br>2 Often<br>3 Most of the time<br>4 Always<br>5 Difficult to answer                                                            |                            |
| 12. Have you had this problem 6 months or longer?                                                                       | 0 No<br>1 Yes                                                                                                                                                     |                            |
| 13. In the last 3 months, how often did you feel uncomfortably full after a regular-sized meal?                         | 0 Never →→→→→<br>1 Less than one day a month<br>2 One day a month<br>3 Two to three days a month<br>4 One day a week<br>5 More than one day a week                | <i>Skip to question 15</i> |

# EAR3Q

Date: \_\_\_/\_\_\_/\_\_\_  
           dd    mm    yy

Initials: \_\_\_\_\_

|                                                                                                                                                                                                                                                                                                                                                                                                                                                                                                                                                                                                  |                                                                                                                                                                                                                                                                                                                                                                                                                                                                                                       |                                   |
|--------------------------------------------------------------------------------------------------------------------------------------------------------------------------------------------------------------------------------------------------------------------------------------------------------------------------------------------------------------------------------------------------------------------------------------------------------------------------------------------------------------------------------------------------------------------------------------------------|-------------------------------------------------------------------------------------------------------------------------------------------------------------------------------------------------------------------------------------------------------------------------------------------------------------------------------------------------------------------------------------------------------------------------------------------------------------------------------------------------------|-----------------------------------|
|                                                                                                                                                                                                                                                                                                                                                                                                                                                                                                                                                                                                  | 6 Every day                                                                                                                                                                                                                                                                                                                                                                                                                                                                                           |                                   |
| <p>14. Have you had this uncomfortable fullness after meals 6 months or longer?</p> <p>a. Is this uncomfortable fullness related to meal?</p> <p>b. Usually, where is this uncomfortable fullness located?</p> <p>c. Indicate in the diagram on the right where the uncomfortable fullness is located. If you have more than one location, indicate only the one that bothers you the most.</p> <p>d. How do you get most relief from your fullness?</p> <p>e. How do you define the severity of your fullness?</p> <p>f. During abdominal fullness do you have to rush to go to the toilet?</p> | <p>0 No</p> <p>1 Yes</p><br><p>0 No</p> <p>1 Yes, after a large meal</p> <p>2 Yes, after a regular meal</p> <p>3 Yes, after a small meal</p><br><p>1 Upper abdomen</p> <p>2 Lower abdomen</p> <p>3 Around your belly button</p> <p>4 Whole of abdomen</p> <p>5 Chest</p><br><p>1 by passing stool</p> <p>2 by passing flatus</p> <p>3 both</p> <p>4 none</p> <p>5 belching</p><br><p>1 Very mild</p> <p>2 Mild</p> <p>3 Moderate</p> <p>4 Severe</p> <p>5 Very severe</p><br><p>0 No</p> <p>1 Yes</p> | <p>c.</p>                         |
| <p>15. In the last 3 months, how often were you unable to finish a regular size meal?</p>                                                                                                                                                                                                                                                                                                                                                                                                                                                                                                        | <p>0 Never                   →→→→→→</p> <p>1 Less than one day a month</p> <p>2 One day a month</p> <p>3 Two to three days a month</p>                                                                                                                                                                                                                                                                                                                                                                | <p><i>Skip to question 17</i></p> |

# EAR3Q

Date: \_\_\_/\_\_\_/\_\_\_  
dd mm yy

Initials: \_\_\_\_\_

|                                                                                                                                                                                                                                                                                                                                                         |                                                                                                                                                                                                                                                                     |                                                                                                                                   |
|---------------------------------------------------------------------------------------------------------------------------------------------------------------------------------------------------------------------------------------------------------------------------------------------------------------------------------------------------------|---------------------------------------------------------------------------------------------------------------------------------------------------------------------------------------------------------------------------------------------------------------------|-----------------------------------------------------------------------------------------------------------------------------------|
|                                                                                                                                                                                                                                                                                                                                                         | <p>4 One day a week</p> <p>5 More than one day a week</p> <p>6 Every day</p>                                                                                                                                                                                        |                                                                                                                                   |
| <p>16. Have you had this inability to finish regular size meals 6 months or longer?</p>                                                                                                                                                                                                                                                                 | <p>0 No</p> <p>1 Yes</p>                                                                                                                                                                                                                                            |                                                                                                                                   |
| <p>17. In the last 3 months, how often did you have pain or burning in the middle of your abdomen, above your belly button but not in your chest?</p> <p>a. Indicate in the diagram on the right, the location of this pain or burning. If you have more than one location, indicate only the one that bothers you the most.</p> <p>b. Did you have</p> | <p>0 Never →→→→→</p> <p>1 Less than one day a month</p> <p>2 One day a month</p> <p>3 Two to three days a month</p> <p>4 One day a week</p> <p>5 More than one day a week</p> <p>6 Every day</p> <p>1 Pain only</p> <p>2 Burning only</p> <p>3 Pain and burning</p> | <p><i>Skip to question 26</i></p> <p>a.</p> 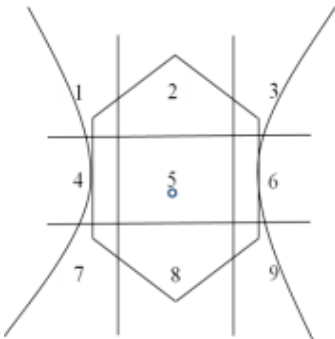 |
| <p>18. Have you had this pain or burning 6 months or longer?</p>                                                                                                                                                                                                                                                                                        | <p>0 No</p> <p>1 Yes</p>                                                                                                                                                                                                                                            |                                                                                                                                   |
| <p>19. Did this pain or burning occur and then completely disappear during the same day?</p>                                                                                                                                                                                                                                                            | <p>0 Never or rarely</p> <p>1 Sometimes</p> <p>2 Often</p> <p>3 Most of the time</p> <p>4 Always</p>                                                                                                                                                                |                                                                                                                                   |

# EAR3Q

Date: \_\_\_/\_\_\_/\_\_\_  
dd mm yy

Initials: \_\_\_\_\_

|                                                                                                                                                                                                                                                                              |                                                                                                                                                                                                                                                                                                                                                                                                                        |  |
|------------------------------------------------------------------------------------------------------------------------------------------------------------------------------------------------------------------------------------------------------------------------------|------------------------------------------------------------------------------------------------------------------------------------------------------------------------------------------------------------------------------------------------------------------------------------------------------------------------------------------------------------------------------------------------------------------------|--|
| <p>20. Usually, how severe was the pain or burning in the middle of your abdomen, above your belly button?</p>                                                                                                                                                               | <p>1 Very mild<br/>                 2 Mild<br/>                 3 Moderate<br/>                 4 Severe<br/>                 5 Very severe</p>                                                                                                                                                                                                                                                                        |  |
| <p>21. Was this pain or burning affected by eating?</p>                                                                                                                                                                                                                      | <p>0 Not affected by eating<br/>                 1 Worse pain after eating<br/>                 2 Less pain after eating</p>                                                                                                                                                                                                                                                                                           |  |
| <p>22. Was this pain or burning relieved by taking antacids?</p>                                                                                                                                                                                                             | <p>0 Never or rarely<br/>                 1 Sometimes<br/>                 2 Often<br/>                 3 Most of the time<br/>                 4 Always</p>                                                                                                                                                                                                                                                           |  |
| <p>23. Did this pain or burning usually get better or stop after a bowel movement or passing gas?</p> <p>a. Did this pain or burning get better after a bowel movement or passing gas?</p> <p>b. Did this pain or burning get worse after bowel movement or passing gas?</p> | <p>0 Never or rarely<br/>                 1 Sometimes<br/>                 2 Often<br/>                 3 Most of the time<br/>                 4 Always</p> <p>0 No<br/>                 1 After bowel movement<br/>                 2 After passing gas<br/>                 3 Both</p> <p>0 No<br/>                 1 After bowel movement<br/>                 2 After passing gas<br/>                 3 Both</p> |  |
| <p>24. When this pain or burning started, did you usually have a change in the number of bowel movements (either more or fewer)?</p>                                                                                                                                         | <p>0 Never or rarely<br/>                 1 Sometimes<br/>                 2 Often<br/>                 3 Most of the time<br/>                 4 Always</p>                                                                                                                                                                                                                                                           |  |
| <p>25. When this pain or burning started,</p>                                                                                                                                                                                                                                | <p>0 Never or rarely</p>                                                                                                                                                                                                                                                                                                                                                                                               |  |

# EAR3Q

Date: \_\_\_/\_\_\_/\_\_\_  
dd mm yy

Initials: \_\_\_\_\_

|                                                                                                               |                                                                                                                                                                   |                            |
|---------------------------------------------------------------------------------------------------------------|-------------------------------------------------------------------------------------------------------------------------------------------------------------------|----------------------------|
| did you usually have softer or harder stools?                                                                 | 1 Sometimes<br>2 Often<br>3 Most of the time<br>4 Always                                                                                                          |                            |
| 26. In the last 3 months, how often did you have bothersome nausea?                                           | 0 Never →→→→→<br>1 Less than one day a month<br>2 One day a month<br>3 Two to three days a month<br>4 One day a week<br>5 More than one day a week<br>6 Every day | <i>Skip to question 28</i> |
| 27. Did this nausea start more than 6 months ago?                                                             | 0 No<br>1 Yes                                                                                                                                                     |                            |
| 28. In the last 3 months, how often did you vomit?                                                            | 0 Never →→→→→<br>1 Less than one day a month<br>2 One day a month<br>3 Two to three days a month<br>4 One day a week<br>5 More than one day a week<br>6 Every day | <i>Skip to question 33</i> |
| 29. Have you had this vomiting 6 months or longer?                                                            | 0 No<br>1 Yes                                                                                                                                                     |                            |
| 30. Did you make yourself vomit?                                                                              | 0 Never or rarely<br>1 Sometimes<br>2 Often<br>3 Most of the time<br>4 Always                                                                                     |                            |
| 31. Did you have vomiting in the last year that occurred in separate episodes of a few days and then stopped? | 0 Never or rarely →→→→→<br>1 Sometimes<br>2 Often<br>3 Most of the time<br>4 Always                                                                               | <i>Skip to question 33</i> |
| 32. Did you have at least three episodes during the past year?                                                | 0 No<br>1 Yes                                                                                                                                                     |                            |
| 33. In the last 3 months, how often did food come back up into your mouth?                                    | 0 Never →→→→→<br>1 Less than one day a month<br>2 One day a month                                                                                                 | <i>Skip to question 39</i> |

# EAR3Q

Date: \_\_\_/\_\_\_/\_\_\_  
dd mm yy

Initials: \_\_\_\_\_

|                                                                                                                                   |                                                                                                                                                                   |                            |
|-----------------------------------------------------------------------------------------------------------------------------------|-------------------------------------------------------------------------------------------------------------------------------------------------------------------|----------------------------|
|                                                                                                                                   | 3 Two to three days a month<br>4 One day a week<br>5 More than one day a week<br>6 Every day                                                                      |                            |
| 34. Have you had this problem (food coming back up into your mouth) 6 months or longer?                                           | 0 No<br>1 Yes                                                                                                                                                     |                            |
| 35. When food came back up into your mouth, did it usually stay in your mouth for a while before you swallowed it or spit it out? | 0 Never or rarely<br>1 Sometimes<br>2 Often<br>3 Most of the time<br>4 Always                                                                                     |                            |
| 36. Did you have retching (heaving) before food came into your mouth?                                                             | 0 Never or rarely<br>1 Sometimes<br>2 Often<br>3 Most of the time<br>4 Always                                                                                     |                            |
| 37. When food came into your mouth, how often did you vomit or feel sick to your stomach?                                         | 0 Never or rarely<br>1 Sometimes<br>2 Often<br>3 Most of the time<br>4 Always                                                                                     |                            |
| 38. Did food stop coming back up into your mouth when it turned sour or acidic?                                                   | 0 Never or rarely<br>1 Sometimes<br>2 Often<br>3 Most of the time<br>4 Always                                                                                     |                            |
| 39. In the last 3 months, how often did you experience bothersome belching?                                                       | 0 Never →→→→→<br>1 Less than one day a month<br>2 One day a month<br>3 Two to three days a month<br>4 One day a week<br>5 More than one day a week<br>6 Every day | <i>Skip to question 41</i> |

# EAR3Q

Date: \_\_\_/\_\_\_/\_\_\_  
dd mm yy

Initials: \_\_\_\_\_

|                                                                              |                                                                                                                                  |                            |
|------------------------------------------------------------------------------|----------------------------------------------------------------------------------------------------------------------------------|----------------------------|
| 40. Did this bothersome belching start more than 6 months ago?               | 0 No<br>1 Yes                                                                                                                    |                            |
| a. Do you have belching before meals?                                        | 0 No<br>1 Yes                                                                                                                    |                            |
| b. Do you have belching during meals?                                        | 0 No<br>1 Yes                                                                                                                    |                            |
| c. Do you have belching after meals?                                         | 0 No<br>1 Yes                                                                                                                    |                            |
| d. Do you have belching unrelated to meals?                                  | 0 No<br>1 Yes                                                                                                                    |                            |
| e. Usually how severe was the belching?                                      | 1 Very mild<br>2 Mild<br>3 Moderate<br>4 Severe<br>5 Very severe                                                                 |                            |
| f. Did this belching usually get better after                                | 1 Bowel movement<br>2 Passing flatus<br>3 Eating                                                                                 |                            |
| g. Did belching occur at the same time with                                  | 1 Bloating<br>2 Abdominal pain<br>3 Heartburn<br>4 Bringing up of food into the mouth<br>5 Bringing up of liquid into the mouth  |                            |
| h. Is your belching relieved with                                            | 1 Meals<br>2 Passing flatus<br>3 After bowel movement<br>4 Antacids or medications to reduce stomach acid<br>5 None of the above |                            |
| 41. In the last 3 months, how often did you have discomfort or pain anywhere | 0 Never →→→→→<br>1 Less than one day a month                                                                                     | <i>Skip to question 52</i> |



# EAR3Q

Date: \_\_\_/\_\_\_/\_\_\_  
dd mm yy

Initials: \_\_\_\_\_

|                                                                                                                                                                                         |                                                                                                                                                                                                                               |                                                                                               |
|-----------------------------------------------------------------------------------------------------------------------------------------------------------------------------------------|-------------------------------------------------------------------------------------------------------------------------------------------------------------------------------------------------------------------------------|-----------------------------------------------------------------------------------------------|
| <p>in your abdomen?</p> <p>a. Indicate in the diagram on the right, the location of this pain. If you have more than one location, indicate only the one that bothers you the most.</p> | <p>2 One day a month<br/>           3 Two to three days a month<br/>           4 One day a week<br/>           5 More than one day a week<br/>           6 Every day</p>                                                      | <p>a. 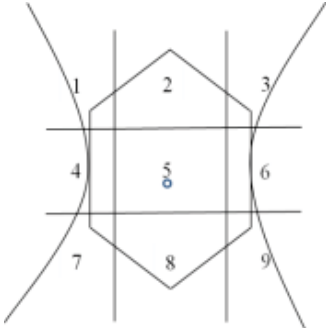</p> |
| <p>42. Did you only have pain (not discomfort or a mixture of discomfort and pain)?</p> <p>a. Did you have</p>                                                                          | <p>0 Never or rarely<br/>           1 Sometimes<br/>           2 Often<br/>           3 Most of the time<br/>           4 Always</p> <p>1 Pain only<br/>           2 Discomfort only<br/>           3 Pain and discomfort</p> |                                                                                               |
| <p>43. For women: Did this discomfort or pain occur only during your menstrual bleeding and not at other times?</p>                                                                     | <p>0 No<br/>           1 Yes<br/>           2 Does not apply because I have had the change in life (menopause) or I am a male</p>                                                                                             |                                                                                               |
| <p>44. When you had this pain, how often did it limit or restrict your daily activities (for example, work, household activities, and social events)?</p>                               | <p>0 Never or rarely<br/>           1 Sometimes<br/>           2 Often<br/>           3 Most of the time<br/>           4 Always</p>                                                                                          |                                                                                               |
| <p>45. Have you had this discomfort or pain 6 months or longer?</p>                                                                                                                     | <p>0 No<br/>           1 Yes</p>                                                                                                                                                                                              |                                                                                               |
| <p>46. How often did this discomfort or</p>                                                                                                                                             | <p>0 Never or rarely</p>                                                                                                                                                                                                      |                                                                                               |

# EAR3Q

Date: \_\_\_/\_\_\_/\_\_\_  
dd mm yy

Initials: \_\_\_\_\_

|                                                                                                                                                                           |                                                                                                                                                                                                                                                                                    |  |
|---------------------------------------------------------------------------------------------------------------------------------------------------------------------------|------------------------------------------------------------------------------------------------------------------------------------------------------------------------------------------------------------------------------------------------------------------------------------|--|
| <p>pain get better or stop after you had a bowel movement?</p> <p>a. How often did this discomfort or pain get worse after you had a bowel movement?</p>                  | <p>1 Sometimes<br/>                 2 Often<br/>                 3 Most of the time<br/>                 4 Always</p> <p>0 Never or rarely<br/>                 1 Sometimes<br/>                 2 Often<br/>                 3 Most of the time<br/>                 4 Always</p> |  |
| <p>47. When this discomfort or pain started, did you have more frequent bowel movements?</p>                                                                              | <p>0 Never or rarely<br/>                 1 Sometimes<br/>                 2 Often<br/>                 3 Most of the time<br/>                 4 Always</p>                                                                                                                       |  |
| <p>48. When this discomfort or pain started, did you have less frequent bowel movements?</p>                                                                              | <p>0 Never or rarely<br/>                 1 Sometimes<br/>                 2 Often<br/>                 3 Most of the time<br/>                 4 Always</p>                                                                                                                       |  |
| <p>49. When this discomfort or pain started, were your stools (bowel movements) looser?</p>                                                                               | <p>0 Never or rarely<br/>                 1 Sometimes<br/>                 2 Often<br/>                 3 Most of the time<br/>                 4 Always</p>                                                                                                                       |  |
| <p>50. When this discomfort or pain started, how often did you have harder stools?</p>                                                                                    | <p>0 Never or rarely<br/>                 1 Sometimes<br/>                 2 Often<br/>                 3 Most of the time<br/>                 4 Always</p>                                                                                                                       |  |
| <p>51. How often was this pain or discomfort relieved by moving or changing positions?</p> <p><b>*You may take a 5 minute rest before you move on to Question 52.</b></p> | <p>0 Never or rarely<br/>                 1 Sometimes<br/>                 2 Often<br/>                 3 Most of the time<br/>                 4 Always</p>                                                                                                                       |  |

# EAR3Q

Date: \_\_\_/\_\_\_/\_\_\_  
dd mm yy

Initials: \_\_\_\_\_

|                                                                                                                                                                                                                                                                               |                                                                                                                                                                                                                                                                                                                                                                |  |
|-------------------------------------------------------------------------------------------------------------------------------------------------------------------------------------------------------------------------------------------------------------------------------|----------------------------------------------------------------------------------------------------------------------------------------------------------------------------------------------------------------------------------------------------------------------------------------------------------------------------------------------------------------|--|
| <p>52. In the last 3 months, how often did you have fewer than three bowel movements (0-2) a week?</p>                                                                                                                                                                        | <p>0 Never or rarely<br/>           1 Sometimes<br/>           2 Often<br/>           3 Most of the time<br/>           4 Always<br/>           5 Difficult to remember or decide</p>                                                                                                                                                                          |  |
| <p>53. In the last 3 months, how often did you have hard or lumpy stools?</p>                                                                                                                                                                                                 | <p>0 Never or rarely<br/>           1 Sometimes<br/>           2 Often<br/>           3 Most of the time<br/>           4 Always</p>                                                                                                                                                                                                                           |  |
| <p>54. In the last 3 months, how often did you strain during bowel movements?</p>                                                                                                                                                                                             | <p>0 Never or rarely<br/>           1 Sometimes<br/>           2 Often<br/>           3 Most of the time<br/>           4 Always</p>                                                                                                                                                                                                                           |  |
| <p>55. In the last 3 months, how often did you have a feeling of incomplete emptying after bowel movements?</p>                                                                                                                                                               | <p>0 Never or rarely<br/>           1 Sometimes<br/>           2 Often<br/>           3 Most of the time<br/>           4 Always</p>                                                                                                                                                                                                                           |  |
| <p>56. In the last 3 months, how often did you have a sensation that the stool could not be passed, (i.e., blocked), when having a bowel movement?</p> <p>a. Did you have difficulty passing stool because it was</p> <p>b. Did you have difficulty passing stool because</p> | <p>0 Never or rarely<br/>           1 Sometimes<br/>           2 Often<br/>           3 Most of the time<br/>           4 Always</p> <p>1 Too big<br/>           2 Too thin<br/>           3 Too hard<br/>           4 Too dry<br/>           5 None of the above</p> <p>1 No urge<br/>           2 Weak push<br/>           3 Able to push but gets stuck</p> |  |
| <p>57. In the last 3 months, how often did you press on or around your bottom or remove stool in order to complete a</p>                                                                                                                                                      | <p>0 Never or rarely<br/>           1 Sometimes<br/>           2 Often</p>                                                                                                                                                                                                                                                                                     |  |

# EAR3Q

Date: \_\_\_/\_\_\_/\_\_\_  
dd mm yy

Initials: \_\_\_\_\_

|                                                                                                                                                                                                                                                                                                                                                                     |                                                                                                                                |  |
|---------------------------------------------------------------------------------------------------------------------------------------------------------------------------------------------------------------------------------------------------------------------------------------------------------------------------------------------------------------------|--------------------------------------------------------------------------------------------------------------------------------|--|
| <p>bowel movement?</p> <p>a. In the last 3 months, did you have to insert your finger to remove stool?</p> <p>b. In the last 3 months, did you have to flush with water to remove stool?</p> <p>c. In the last 3 months, did you have to insert a suppository to remove stool?</p> <p>d. In the last 3 months, did you have to insert an enema to remove stool?</p> | <p>3 Most of the time<br/>4 Always</p> <p>0 No<br/>1 Yes</p> <p>0 No<br/>1 Yes</p> <p>0 No<br/>1 Yes</p> <p>0 No<br/>1 Yes</p> |  |
| <p>58. In the last 3 months, how often did you have difficulty relaxing or letting go to allow the stool to come out during a bowel movement?</p>                                                                                                                                                                                                                   | <p>0 Never or rarely<br/>1 Sometimes<br/>2 Often<br/>3 Most of the time<br/>4 Always</p>                                       |  |
| <p>59. Did any of the symptoms of constipation listed in questions 52 – 58 above begin more than 6 months ago?</p>                                                                                                                                                                                                                                                  | <p>0 No<br/>1 Yes</p>                                                                                                          |  |
| <p>60. In the last 3 months, how often did you have 4 or more bowel movements a day?</p>                                                                                                                                                                                                                                                                            | <p>0 Never or rarely<br/>1 Sometimes<br/>2 Often<br/>3 Most of the time<br/>4 Always<br/>5 Difficult to remember or decide</p> |  |
| <p>61. In the last 3 months, how often did you have loose, mushy, or watery stools?</p>                                                                                                                                                                                                                                                                             | <p>0 Never or rarely<br/>1 Sometimes<br/>2 Often<br/>3 Most of the time<br/>4 Always</p>                                       |  |

# EAR3Q

Date: \_\_\_/\_\_\_/\_\_\_  
dd mm yy

Initials: \_\_\_\_\_

|                                                                                                                                                                                                                                                                                                                                                                                                                                                                                                                                                                                                                                                                                                                 |                                                                                                                                                                                                                                                                                                     |                                                                                                                                                                                                                                                                                                                                                                                                                                                                                                                                                                                                                                                                                                                                                                                                                                                                                                                                                                                                                                                                                                                                                                                                                                                                                                                                                                                                                                                                                                                                                                                                                                                                                                                                                                                                                                                                 |                                                                                     |                                              |   |                                                                                       |                          |   |                                                                                       |                                             |   |                                                                                       |                                      |   |                                                                                       |                                                 |   |                                                                                       |                                                |   |                        |                         |   |
|-----------------------------------------------------------------------------------------------------------------------------------------------------------------------------------------------------------------------------------------------------------------------------------------------------------------------------------------------------------------------------------------------------------------------------------------------------------------------------------------------------------------------------------------------------------------------------------------------------------------------------------------------------------------------------------------------------------------|-----------------------------------------------------------------------------------------------------------------------------------------------------------------------------------------------------------------------------------------------------------------------------------------------------|-----------------------------------------------------------------------------------------------------------------------------------------------------------------------------------------------------------------------------------------------------------------------------------------------------------------------------------------------------------------------------------------------------------------------------------------------------------------------------------------------------------------------------------------------------------------------------------------------------------------------------------------------------------------------------------------------------------------------------------------------------------------------------------------------------------------------------------------------------------------------------------------------------------------------------------------------------------------------------------------------------------------------------------------------------------------------------------------------------------------------------------------------------------------------------------------------------------------------------------------------------------------------------------------------------------------------------------------------------------------------------------------------------------------------------------------------------------------------------------------------------------------------------------------------------------------------------------------------------------------------------------------------------------------------------------------------------------------------------------------------------------------------------------------------------------------------------------------------------------------|-------------------------------------------------------------------------------------|----------------------------------------------|---|---------------------------------------------------------------------------------------|--------------------------|---|---------------------------------------------------------------------------------------|---------------------------------------------|---|---------------------------------------------------------------------------------------|--------------------------------------|---|---------------------------------------------------------------------------------------|-------------------------------------------------|---|---------------------------------------------------------------------------------------|------------------------------------------------|---|------------------------|-------------------------|---|
| <p>62. In the last 3 months, were at least three-fourths (3/4) of your stools loose, mushy or watery?</p>                                                                                                                                                                                                                                                                                                                                                                                                                                                                                                                                                                                                       | <p>0 No<br/>                 1 Yes<br/>                 2 Difficult to decide</p>                                                                                                                                                                                                                   |                                                                                                                                                                                                                                                                                                                                                                                                                                                                                                                                                                                                                                                                                                                                                                                                                                                                                                                                                                                                                                                                                                                                                                                                                                                                                                                                                                                                                                                                                                                                                                                                                                                                                                                                                                                                                                                                 |                                                                                     |                                              |   |                                                                                       |                          |   |                                                                                       |                                             |   |                                                                                       |                                      |   |                                                                                       |                                                 |   |                                                                                       |                                                |   |                        |                         |   |
| <p><b>*Following questions (62a to 62g) should be answered by all subjects.</b></p> <p>a. How do you feel about your bowel habit?</p> <p>b. What is your average stool frequency per week?</p> <p>*c. Indicate the type of stool you usually pass when you are well</p> <p>*d. Indicate the type of stool you usually pass when you are constipated</p> <p>*e. Indicate the type of stool you usually pass when you have diarrhoea</p> <p>*f. Indicate the type of stool you usually pass most of the time</p> <p>*g. Indicate the type of stool you usually pass when you feel the worse</p> <p><i>* refer to Bristol Stool Scale Form diagram and fill in the space given with the appropriate number</i></p> | <p>1 Constipated<br/>                 2 Diarrhoea<br/>                 3 Sometimes constipation and sometimes diarrhoea<br/>                 4 None of the above</p> <p>_____ no./week</p> <p>BSS no. _____</p> | <p style="text-align: center;">Bristol Stool Scale Form (BSS)</p> <table border="1" style="width: 100%; border-collapse: collapse;"> <tr> <td style="text-align: center;"></td> <td style="padding: 2px;">Separate hard lumps, like nuts, hard to pass</td> <td style="text-align: center; width: 20px;">1</td> </tr> <tr> <td style="text-align: center;"></td> <td style="padding: 2px;">Sausage-shaped but lumpy</td> <td style="text-align: center;">2</td> </tr> <tr> <td style="text-align: center;"></td> <td style="padding: 2px;">Like sausage but with cracks on its surface</td> <td style="text-align: center;">3</td> </tr> <tr> <td style="text-align: center;"></td> <td style="padding: 2px;">Like sausage or snake, smooth &amp; soft</td> <td style="text-align: center;">4</td> </tr> <tr> <td style="text-align: center;"></td> <td style="padding: 2px;">Soft blobs with clear cut edges (passed easily)</td> <td style="text-align: center;">5</td> </tr> <tr> <td style="text-align: center;"></td> <td style="padding: 2px;">Fluffy pieces with ragged edges, a mushy stool</td> <td style="text-align: center;">6</td> </tr> <tr> <td style="text-align: center;"><b>ENTIRELY LIQUID</b></td> <td style="padding: 2px;">Watery, no solid pieces</td> <td style="text-align: center;">7</td> </tr> </table> |  | Separate hard lumps, like nuts, hard to pass | 1 |  | Sausage-shaped but lumpy | 2 |  | Like sausage but with cracks on its surface | 3 |  | Like sausage or snake, smooth & soft | 4 |  | Soft blobs with clear cut edges (passed easily) | 5 |  | Fluffy pieces with ragged edges, a mushy stool | 6 | <b>ENTIRELY LIQUID</b> | Watery, no solid pieces | 7 |
|                                                                                                                                                                                                                                                                                                                                                                                                                                                                                                                                                                                                                              | Separate hard lumps, like nuts, hard to pass                                                                                                                                                                                                                                                        | 1                                                                                                                                                                                                                                                                                                                                                                                                                                                                                                                                                                                                                                                                                                                                                                                                                                                                                                                                                                                                                                                                                                                                                                                                                                                                                                                                                                                                                                                                                                                                                                                                                                                                                                                                                                                                                                                               |                                                                                     |                                              |   |                                                                                       |                          |   |                                                                                       |                                             |   |                                                                                       |                                      |   |                                                                                       |                                                 |   |                                                                                       |                                                |   |                        |                         |   |
|                                                                                                                                                                                                                                                                                                                                                                                                                                                                                                                                                                                                                            | Sausage-shaped but lumpy                                                                                                                                                                                                                                                                            | 2                                                                                                                                                                                                                                                                                                                                                                                                                                                                                                                                                                                                                                                                                                                                                                                                                                                                                                                                                                                                                                                                                                                                                                                                                                                                                                                                                                                                                                                                                                                                                                                                                                                                                                                                                                                                                                                               |                                                                                     |                                              |   |                                                                                       |                          |   |                                                                                       |                                             |   |                                                                                       |                                      |   |                                                                                       |                                                 |   |                                                                                       |                                                |   |                        |                         |   |
|                                                                                                                                                                                                                                                                                                                                                                                                                                                                                                                                                                                                                            | Like sausage but with cracks on its surface                                                                                                                                                                                                                                                         | 3                                                                                                                                                                                                                                                                                                                                                                                                                                                                                                                                                                                                                                                                                                                                                                                                                                                                                                                                                                                                                                                                                                                                                                                                                                                                                                                                                                                                                                                                                                                                                                                                                                                                                                                                                                                                                                                               |                                                                                     |                                              |   |                                                                                       |                          |   |                                                                                       |                                             |   |                                                                                       |                                      |   |                                                                                       |                                                 |   |                                                                                       |                                                |   |                        |                         |   |
|                                                                                                                                                                                                                                                                                                                                                                                                                                                                                                                                                                                                                            | Like sausage or snake, smooth & soft                                                                                                                                                                                                                                                                | 4                                                                                                                                                                                                                                                                                                                                                                                                                                                                                                                                                                                                                                                                                                                                                                                                                                                                                                                                                                                                                                                                                                                                                                                                                                                                                                                                                                                                                                                                                                                                                                                                                                                                                                                                                                                                                                                               |                                                                                     |                                              |   |                                                                                       |                          |   |                                                                                       |                                             |   |                                                                                       |                                      |   |                                                                                       |                                                 |   |                                                                                       |                                                |   |                        |                         |   |
|                                                                                                                                                                                                                                                                                                                                                                                                                                                                                                                                                                                                                            | Soft blobs with clear cut edges (passed easily)                                                                                                                                                                                                                                                     | 5                                                                                                                                                                                                                                                                                                                                                                                                                                                                                                                                                                                                                                                                                                                                                                                                                                                                                                                                                                                                                                                                                                                                                                                                                                                                                                                                                                                                                                                                                                                                                                                                                                                                                                                                                                                                                                                               |                                                                                     |                                              |   |                                                                                       |                          |   |                                                                                       |                                             |   |                                                                                       |                                      |   |                                                                                       |                                                 |   |                                                                                       |                                                |   |                        |                         |   |
|                                                                                                                                                                                                                                                                                                                                                                                                                                                                                                                                                                                                                            | Fluffy pieces with ragged edges, a mushy stool                                                                                                                                                                                                                                                      | 6                                                                                                                                                                                                                                                                                                                                                                                                                                                                                                                                                                                                                                                                                                                                                                                                                                                                                                                                                                                                                                                                                                                                                                                                                                                                                                                                                                                                                                                                                                                                                                                                                                                                                                                                                                                                                                                               |                                                                                     |                                              |   |                                                                                       |                          |   |                                                                                       |                                             |   |                                                                                       |                                      |   |                                                                                       |                                                 |   |                                                                                       |                                                |   |                        |                         |   |
| <b>ENTIRELY LIQUID</b>                                                                                                                                                                                                                                                                                                                                                                                                                                                                                                                                                                                                                                                                                          | Watery, no solid pieces                                                                                                                                                                                                                                                                             | 7                                                                                                                                                                                                                                                                                                                                                                                                                                                                                                                                                                                                                                                                                                                                                                                                                                                                                                                                                                                                                                                                                                                                                                                                                                                                                                                                                                                                                                                                                                                                                                                                                                                                                                                                                                                                                                                               |                                                                                     |                                              |   |                                                                                       |                          |   |                                                                                       |                                             |   |                                                                                       |                                      |   |                                                                                       |                                                 |   |                                                                                       |                                                |   |                        |                         |   |
| <p>63. In the last 3 months, how often did you have to rush to the toilet to have a bowel movement?</p>                                                                                                                                                                                                                                                                                                                                                                                                                                                                                                                                                                                                         | <p>0 Never or rarely<br/>                 1 Sometimes<br/>                 2 Often<br/>                 3 Most of the time<br/>                 4 Always</p>                                                                                                                                        |                                                                                                                                                                                                                                                                                                                                                                                                                                                                                                                                                                                                                                                                                                                                                                                                                                                                                                                                                                                                                                                                                                                                                                                                                                                                                                                                                                                                                                                                                                                                                                                                                                                                                                                                                                                                                                                                 |                                                                                     |                                              |   |                                                                                       |                          |   |                                                                                       |                                             |   |                                                                                       |                                      |   |                                                                                       |                                                 |   |                                                                                       |                                                |   |                        |                         |   |

# EAR3Q

Date: \_\_\_/\_\_\_/\_\_\_  
dd mm yy

Initials: \_\_\_\_\_

|                                                                                                                                                                                                                                                                                                                                                                                                                       |                                                                                                                                                                                                                                                                                                                                                                            |                                             |
|-----------------------------------------------------------------------------------------------------------------------------------------------------------------------------------------------------------------------------------------------------------------------------------------------------------------------------------------------------------------------------------------------------------------------|----------------------------------------------------------------------------------------------------------------------------------------------------------------------------------------------------------------------------------------------------------------------------------------------------------------------------------------------------------------------------|---------------------------------------------|
| <p>a. When does this occur?</p> <p>b. How do you define the severity?</p>                                                                                                                                                                                                                                                                                                                                             | <p>1 After a meal<br/>                 2 When you feel full or bloated<br/>                 3 When you have epigastric pain<br/>                 4 When you are anxious or stressed</p> <p>1 Very mild<br/>                 2 Mild<br/>                 3 Moderate<br/>                 4 Severe<br/>                 5 Very severe</p>                                    |                                             |
| <p>64. Did you begin having frequent loose, mushy, or watery stools more than 6 months ago?</p>                                                                                                                                                                                                                                                                                                                       | <p>0 No<br/>                 1 Yes</p>                                                                                                                                                                                                                                                                                                                                     |                                             |
| <p>65. In the last 3 months, how often was there mucus or slime in your bowel movement?</p>                                                                                                                                                                                                                                                                                                                           | <p>0 Never or rarely<br/>                 1 Sometimes<br/>                 2 Often<br/>                 3 Most of the time<br/>                 4 Always</p>                                                                                                                                                                                                               |                                             |
| <p>66. In the last 3 months, how often did you have bloating or distension?</p> <p>a. Indicate in the diagram on the right, the location of this bloating or distension. If you have more than one location, just indicate the one that bothers you the most.</p> <p>b. Was this bloating or distension relieved with defecation?</p> <p>c. Was this bloating or distension associated with more frequent or less</p> | <p>0 Never                      →→→→→→</p> <p>1 Less than one day a month<br/>                 2 One day a month<br/>                 3 Two to three days a month<br/>                 4 One day a week<br/>                 5 More than one day a week<br/>                 6 Every day</p> <p>0 No<br/>                 1 Yes</p> <p>0 No<br/>                 1 Yes</p> | <p><i>Skip to question 68</i></p> <p>a.</p> |

# EAR3Q

Date: \_\_\_/\_\_\_/\_\_\_  
dd mm yy

Initials: \_\_\_\_\_

|                                                                                                                                                                                                                                                                                 |                                                                                                                                                                   |                                                                                                                     |
|---------------------------------------------------------------------------------------------------------------------------------------------------------------------------------------------------------------------------------------------------------------------------------|-------------------------------------------------------------------------------------------------------------------------------------------------------------------|---------------------------------------------------------------------------------------------------------------------|
| frequent stool?<br><br>d. Was this bloating or distension associated with harder or softer stool?                                                                                                                                                                               | 0 No<br>1 Yes                                                                                                                                                     |                                                                                                                     |
| 67. Did your symptoms of bloating or distension begin more than 6 months ago?                                                                                                                                                                                                   | 0 No<br>1 Yes                                                                                                                                                     |                                                                                                                     |
| 68. In the last 6 months, how often did you have steady pain in the middle or right side of your upper abdomen?<br><br>a. Indicate in the diagram on the right, the location of this pain. If you have more than one location, just indicate the one that bothers you the most. | 0 Never →→→→→<br>1 Less than one day a month<br>2 One day a month<br>3 Two to three days a month<br>4 One day a week<br>5 More than one day a week<br>6 Every day | Skip to question 75<br><br>a. 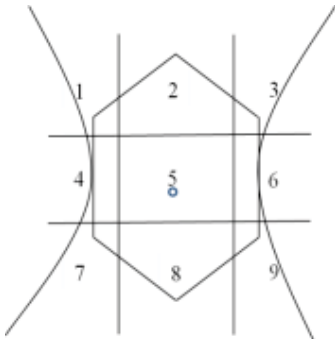 |
| 69. Did this pain last 30 minutes or longer?                                                                                                                                                                                                                                    | 0 Never or rarely<br>1 Sometimes<br>2 Often<br>3 Most of the time<br>4 Always                                                                                     |                                                                                                                     |
| 70. Did this pain build up to a steady, severe level?                                                                                                                                                                                                                           | 0 Never or rarely<br>1 Sometimes<br>2 Often<br>3 Most of the time<br>4 Always                                                                                     |                                                                                                                     |

# EAR3Q

Date: \_\_\_/\_\_\_/\_\_\_  
dd mm yy

Initials: \_\_\_\_\_

|                                                                                                                                 |                                                                                                                                                                                      |                            |
|---------------------------------------------------------------------------------------------------------------------------------|--------------------------------------------------------------------------------------------------------------------------------------------------------------------------------------|----------------------------|
| 71. Did this pain go away completely between episodes?                                                                          | 0 Never or rarely<br>1 Sometimes<br>2 Often<br>3 Most of the time<br>4 Always                                                                                                        |                            |
| 72. Did this pain stop you from your usual activities, or cause you to see a doctor urgently or go to the emergency department? | 0 Never or rarely<br>1 Sometimes<br>2 Often<br>3 Most of the time<br>4 Always                                                                                                        |                            |
| 73. Have you had your gallbladder removed?                                                                                      | 0 No                   →→→→→→<br>1 Yes                                                                                                                                               | <i>Skip to question 75</i> |
| 74. How often have you had this pain since your gallbladder was removed?                                                        | 0 Never or rarely<br>1 Sometimes<br>2 Often<br>3 Most of the time<br>4 Always                                                                                                        |                            |
| 75. How much are you bothered by flatulence?                                                                                    | 0 Never or rarely<br>1 Sometimes<br>2 Often<br>3 Most of the time<br>4 Always                                                                                                        |                            |
| 76. Do you have incontinence to gas?                                                                                            | 0 Never or rarely<br>1 Sometimes<br>2 Often<br>3 Most of the time<br>4 Always                                                                                                        |                            |
| 77. In the last 3 months, how often have you accidentally leaked liquid or solid stool?                                         | 0 Never                   →→→→→→<br>1 Less than one day a month<br>2 One day a month<br>3 Two to three days a month<br>4 One day a week<br>5 More than one day a week<br>6 Every day | <i>Skip to question 80</i> |



# EAR3Q

Date: \_\_\_/\_\_\_/\_\_\_  
dd mm yy

Initials: \_\_\_\_\_

|                                                                                                                                             |                                                                                                                                                                   |                            |
|---------------------------------------------------------------------------------------------------------------------------------------------|-------------------------------------------------------------------------------------------------------------------------------------------------------------------|----------------------------|
| 78. In the last 3 months, when this leakage occurred, about what amount was leaked?                                                         | 1 A small amount (staining only)<br>2 Moderate amount (more than staining, but less than a full bowel movement)<br>3 Large amount (a full bowel movement)         |                            |
| 79. In the last year, when this leakage occurred, what was the composition of leakage?                                                      | 1 Liquid/mucus only<br>2 Stool only<br>3 Both liquid/ mucus and stool                                                                                             |                            |
| 80. In the last 3 months, how often have you had aching, pain, or pressure in the anus or rectum when you were not having a bowel movement? | 0 Never →→→→→<br>1 Less than one day a month<br>2 One day a month<br>3 Two to three days a month<br>4 One day a week<br>5 More than one day a week<br>6 Every day | <i>Skip to question 84</i> |
| 81. How long did the aching, pain or pressure last?                                                                                         | 1 From seconds to up to 20 minutes and disappeared completely<br>2 More than 20 minutes and up to several days or longer                                          |                            |
| 82. Did the pain in your anus and rectum occur and then completely disappear during the same day?                                           | 0 No<br>1 Yes                                                                                                                                                     |                            |
| 83. Did the aching, pain or pressure in the anal canal or rectum begin more than 6 months ago?                                              | 0 No<br>1 Yes                                                                                                                                                     |                            |
| 84. In the past 3 months, how often did you have persistent or worsening hoarseness of the voice?                                           | 0 Never or rarely<br>1 Sometimes<br>2 Often<br>3 Most of the time<br>4 Always                                                                                     |                            |
| 85. In the past 3 months, how often did you have persistent or worsening neck or throat pain?                                               | 0 Never or rarely<br>1 Sometimes<br>2 Often<br>3 Most of the time<br>4 Always                                                                                     |                            |

# EAR3Q

Date: \_\_\_/\_\_\_/\_\_\_  
dd mm yy

Initials: \_\_\_\_\_

|                                                                                                                          |                                                                                                                                                                                                                                                                                                                                                                          |  |
|--------------------------------------------------------------------------------------------------------------------------|--------------------------------------------------------------------------------------------------------------------------------------------------------------------------------------------------------------------------------------------------------------------------------------------------------------------------------------------------------------------------|--|
| <p>86. In the past 3 months, how often did you have chest pain on exertion, or chest pain related to heart problems?</p> | <p>0 Never or rarely<br/>           1 Sometimes<br/>           2 Often<br/>           3 Most of the time<br/>           4 Always</p>                                                                                                                                                                                                                                     |  |
| <p>87. In the last 3 months, how often have you had difficulty swallowing?</p>                                           | <p>0 Never or rarely<br/>           1 Sometimes<br/>           2 Often<br/>           3 Most of the time<br/>           4 Always</p>                                                                                                                                                                                                                                     |  |
| <p>88. Are you satisfied with your previous visits to a doctor for your most bothersome complaint?</p>                   | <p>1. Yes<br/>           2. No, because the doctor ignored my complaints<br/>           3. No, because the doctor did not give enough explanation<br/>           4. No, because the doctor did not perform a thorough investigation.<br/>           5. I have not visited a doctor for this complaint<br/>           6. No, because the treatment was not effective.</p> |  |

## Supplementary Table 2

## EAR3Q

Date: \_\_\_/\_\_\_/\_\_\_

ID \_\_\_\_\_

|                                                                                                                                                                                                                 |                                                                                                                                                                             |                                          |
|-----------------------------------------------------------------------------------------------------------------------------------------------------------------------------------------------------------------|-----------------------------------------------------------------------------------------------------------------------------------------------------------------------------|------------------------------------------|
| <p>1. पिछले 3 महीनों में, कितनी बार आपके गले में कोई पिण्ड, भरा हुआ सा, या कुछ चिपका हुआ सा अनुभव हुआ?</p>                                                                                                      | <p>0. कभी नहीं<br/>1. महिने में एक दिन से कम<br/>2. महिने में एक दिन<br/>3. हफते में एक बार<br/>4. हफते में एक दिन<br/>5. हफते में एक दिन से ज्यादा<br/>6. हर दिन</p>       | <p>प्रश्न 4 पर जाएं (यदि उत्तर 0 है)</p> |
| <p>2. आपको ऐसा 6 महीनों से अनुभव होता है या इससे लम्बे समय से?</p>                                                                                                                                              | <p>0 नहीं<br/>1 हाँ</p>                                                                                                                                                     |                                          |
| <p>3. क्या ऐसी अनुभूति आपके आहारों के मध्य में (जब आप खा नहीं रहे होते हैं) महसूस होती है?</p> <p>a. क्या यह अनुभूति, खाना खाने के संबंध में महसूस होती है?</p> <p>b. आमतौर से, यह अनुभूति कितनी गंभीर रही?</p> | <p>0 नहीं<br/>1 हाँ</p> <p>0 नहीं<br/>1 भोजन से पहले<br/>2 भोजन के दौरान<br/>3 भोजन के बाद</p> <p>1 बहुत हल्का<br/>2 हल्का<br/>3 सामान्य<br/>4 गंभीर<br/>5 बहुत गंभीर</p>   |                                          |
| <p>4. जब आप कुछ खाते या पीते हैं, तो क्या इसे निगलते समय कठिनाई होती है?</p> <p>a. जब आप कुछ खाते या पीते हैं, तो क्या इसे निगलने समय कठिनाई का अनुभव होता है?</p>                                              | <p>0 कभी नहीं या बहुत कम<br/>1 कभी कभी<br/>2 अक्सर<br/>3 ज्यादातर समय<br/>4 हमेशा</p> <p>0 कभी नहीं या बहुत कम<br/>1 कभी कभी<br/>2 अक्सर<br/>3 ज्यादातर समय<br/>4 हमेशा</p> |                                          |
| <p>5. पिछले 3 महीनों में, कितनी बार आपको आपके सीने के बीच में दर्द महसूस हुआ (हृदय समस्याओं से संबंधित नहीं)?</p>                                                                                               | <p>0 कभी नहीं<br/>1 महिने में एक दिन से कम<br/>2 महिने में एक दिन<br/>3 महिने में दो से तीन दिन<br/>4 हफते में एक दिन<br/>5 हफते में एक दिन से ज्यादा बार<br/>6 हर दिन</p>  | <p>प्रश्न 8 पर जाएं (यदि उत्तर 0 है)</p> |
| <p>6. क्या आपको सीने में यह दर्द 6 महीनों से है या इससे लम्बे समय से है?</p>                                                                                                                                    | <p>0 नहीं</p>                                                                                                                                                               |                                          |

# EAR3Q

Date: \_\_\_/\_\_\_/\_\_\_

ID \_\_\_\_\_

|                                                                                                                                          |                                                                                                                                                                 |                                    |
|------------------------------------------------------------------------------------------------------------------------------------------|-----------------------------------------------------------------------------------------------------------------------------------------------------------------|------------------------------------|
|                                                                                                                                          | 1 हाँ                                                                                                                                                           |                                    |
| 7. जब आप को सीने में दर्द हुआ, तो इसमें कितनी बार जलन जैसी अनुभूति हुई?                                                                  | 0 कभी नहीं या बहुत कम<br>1 कभी कभी<br>2 अक्सर<br>3 ज्यादातर समय<br>4 हमेशा                                                                                      |                                    |
| 8. पिछले 3 महीनों में, कितनी बार आपके सीने में जलन महसूस हुई (आपके सीने में जलन जैसी परेशानी या जलन की पीड़ा)?                           | 0 कभी नहीं<br>1 महीने में एक दिन से कम<br>2 महीने में एक दिन<br>3 महीने में दो से तीन दिन<br>4 हफ्ते में एक दिन<br>5 हफ्ते में एक दिन से ज्यादा बार<br>6 हर दिन | प्रश्न 10 पर जाएँ( यदि उत्तर 0 है) |
| 9. क्या आपको यह सीने में जलन (सीने में जलन जैसी परेशानी या जलन की पीड़ा) 6 माह या इससे अधिक समय से है?                                   | 0 नहीं<br>1 हाँ                                                                                                                                                 |                                    |
| 10. पिछले 3 महीनों में, कितनी बार आपको भोजन या पेय निगलने के बाद चिपक जाने का अहसास हुआ या यह आपके सीने में मंद गति से नीचे को जाता लगा? | 0 कभी नहीं<br>1 महीने में एक दिन से कम<br>2 महीने में एक दिन<br>3 महीने में दो से तीन दिन<br>4 हफ्ते में एक दिन<br>5 हफ्ते में एक दिन से ज्यादा बार<br>6 हर दिन | प्रश्न 13 पर जाएँ( यदि उत्तर 0 है) |
| 11. क्या भोजन चिपकने के लक्षण छाती में जलन से जुड़े थे?                                                                                  | 1 कभी नहीं या बहुत कम<br>2 कभी कभी<br>3 अक्सर<br>4 ज्यादातर<br>5 हमेशा<br>6 उत्तर देना कठिन है                                                                  |                                    |
| 12. क्या आपको यह समस्या 6 महीने या उससे पहले से है ?                                                                                     | 1 हाँ<br>2 नहीं                                                                                                                                                 |                                    |
| 13. पिछले 3 महीनों में, कितनी बार आपने सामान्य मात्रा में खाना खाने के बाद भारीपन की असुविधा महसूस की?                                   | 0 कभी नहीं<br>1 महीने में एक दिन से कम<br>2 महीने में एक दिन<br>3 महीने में दो से तीन दिन<br>4 हफ्ते में एक दिन<br>5 हफ्ते में एक दिन से ज्यादा बार<br>6 हर दिन | प्रश्न 15 पर जाएँ( यदि उत्तर 0 है) |

# EAR3Q

Date: \_\_\_/\_\_\_/\_\_\_

ID \_\_\_\_\_

|                                                                                                                                                                                                                                                                                                                                                                                                                                                                                                                                                                                               |                                                                                                                                                                                                                                                                                                                                                                                                                                                    |                                                                                                |
|-----------------------------------------------------------------------------------------------------------------------------------------------------------------------------------------------------------------------------------------------------------------------------------------------------------------------------------------------------------------------------------------------------------------------------------------------------------------------------------------------------------------------------------------------------------------------------------------------|----------------------------------------------------------------------------------------------------------------------------------------------------------------------------------------------------------------------------------------------------------------------------------------------------------------------------------------------------------------------------------------------------------------------------------------------------|------------------------------------------------------------------------------------------------|
| <p>14. क्या आपको खाने के बाद भारीपन की यह असुविधा, 6 महीनों या इससे लम्बे समय से महसूस हुई?</p> <p>a) क्या यह भारीपन, खाने से संबंधित है?</p> <p>b) सामान्यतया, पेट में यह भारीपन कहाँ पर स्थित था?</p> <p>c) दाईं ओर आरेख में संकेत करें कि असुविधाजनक भारीपन कहाँ पर स्थित है। अगर एक से ज्यादा जगह पर भारीपन है तो केवल उस स्थान पर संकेत कीजिए जहाँ पर सबसे ज्यादा परेशानी है।</p> <p>d) आपको पेट के भारीपन से अधिकांश राहत कैसे मिली?</p> <p>e) आपके पेट के भारीपन की गंभीरता को आप कैसे निर्धारित करेंगे?</p> <p>f) पेट में भारीपन के दौरान, क्या आपको भाग कर शौचालय जाना पड़ता है?</p> | <p>0 नहीं</p> <p>1 हाँ</p> <p>0 नहीं</p> <p>1 नियमित भोजन</p> <p>2 ज्यादा भोजन</p> <p>3 कम भोजन</p> <p>1 पेट का ऊपरी भाग</p> <p>2 पेट का निचला भाग</p> <p>3 आपकी नाभि के चारों ओर</p> <p>4 पूरे पेट में</p> <p>5 छाती</p> <p>1 मल त्याग करते हुए</p> <p>2 अधोवायु निकलने पर</p> <p>3 दोनों</p> <p>4 कुछ नहीं</p> <p>5 डकारना</p> <p>1 बहुत हल्का</p> <p>2 हल्का</p> <p>3 सामान्य</p> <p>4 गंभीर</p> <p>5 बहुत गंभीर</p> <p>0 नहीं</p> <p>1 हाँ</p> | <p>C)</p> 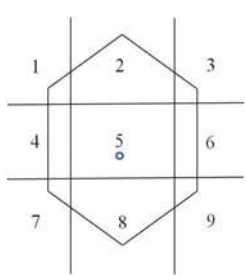 |
| <p>15. पिछले 3 महीनों में, कितनी बार आप सामान्य मात्रा में खाना पूरी तरह खाने में अक्षम रहे?</p>                                                                                                                                                                                                                                                                                                                                                                                                                                                                                              | <p>0 कभी नहीं</p> <p>1 महीने में एक दिन से कम</p> <p>2 महीने में एक दिन</p> <p>3 महीने में दो से तीन दिन</p> <p>4 हफ्ते में एक दिन</p> <p>5 हफ्ते में एक दिन से ज्यादा बार</p> <p>6 हर दिन</p>                                                                                                                                                                                                                                                     | <p>प्रश्न 17 पर जाएँ (यदि उत्तर 0 है)</p>                                                      |

# EAR3Q

Date: \_\_\_/\_\_\_/\_\_\_

ID \_\_\_\_\_

|                                                                                                                                                                                           |                                                                                                                                                                                                                           |                                                                                                                           |
|-------------------------------------------------------------------------------------------------------------------------------------------------------------------------------------------|---------------------------------------------------------------------------------------------------------------------------------------------------------------------------------------------------------------------------|---------------------------------------------------------------------------------------------------------------------------|
|                                                                                                                                                                                           |                                                                                                                                                                                                                           |                                                                                                                           |
| 16. क्या आपमें सामान्य मात्रा में खाना पूरी तरह खाने में यह अक्षमता, 6 महीनों या इससे लम्बे समय से है?                                                                                    | 0 नहीं<br>1 हाँ                                                                                                                                                                                                           |                                                                                                                           |
| 17. पिछले 3 महीनों में, कितनी बार आपको पेट के बीच में दर्द या जलन का अहसास हुआ, आपकी नाभि के ऊपर लेकिन सीने में नहीं? (दाईं ओर दिए आरेख में संकेत करें)<br><br>a) क्या आपको ऐसा महसूस हुआ | 0 कभी नहीं<br>1 महीने में एक दिन से कम<br>2 महीने में एक दिन<br>3 महीने में दो से तीन दिन<br>4 हफ्ते में एक दिन<br>5 हफ्ते में एक दिन से ज्यादा बार<br>6 हर दिन<br><br>1 केवल दर्द<br>2 केवल असुविधा<br>3 दर्द और असुविधा | प्रश्न 26 पर जाएँ (यदि उत्तर 0 है)<br>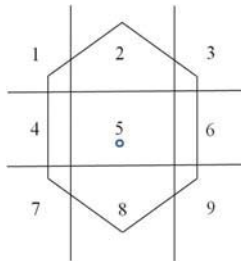 |
| 18. क्या आपको यह दर्द या जलन 6 महीनों या इससे लम्बे समय से है?                                                                                                                            | 0 नहीं<br>1 हाँ                                                                                                                                                                                                           |                                                                                                                           |
| 19. क्या यह दर्द या जलन एक ही दिन में उत्पन्न होने के बाद उसी दिन पूरी तरह से गायब हो गई?                                                                                                 | 1 कभी नहीं या बहुत कम<br>2 कभी कभी<br>3 अक्सर<br>4 ज्यादातर<br>5 हमेशा                                                                                                                                                    |                                                                                                                           |
| 20. आमतौर से, आपके पेट के बीच में, आपकी नाभि के ऊपर दर्द या जलन कितनी गंभीर थी?<br>(दाईं ओर दिए आरेख में संकेत करें)                                                                      | 1 बहुत हल्का<br>2 हल्का<br>3 सामान्य<br>4 गंभीर<br>5 बहुत गंभीर                                                                                                                                                           |                                      |
| 21. क्या यह दर्द या जलन खाने की क्रिया से प्रभावित थी?                                                                                                                                    | 1 भोजन से प्रभावित नहीं<br>2 भोजन के बाद बहुत तीव्र दर्द<br>3 भोजन के बाद कम दर्द                                                                                                                                         |                                      |
| 22. क्या यह दर्द या जलन, एंटासिड लेने से मिट गई?                                                                                                                                          | 1 कभी नहीं या बहुत कम<br>2 कभी कभी<br>3 अक्सर<br>4 ज्यादातर<br>5 हमेशा                                                                                                                                                    |                                                                                                                           |
| 23. क्या इस दर्द या जलन में शौच-क्रिया या अधोवायु (पाद) निकलने के साथ आमतौर से राहत मिली या बंद हो गई?                                                                                    | 1 कभी नहीं या बहुत कम<br>2 कभी कभी<br>3 अक्सर<br>4 ज्यादातर<br>5 हमेशा                                                                                                                                                    |                                                                                                                           |
| b) क्या यह दर्द या जलन,                                                                                                                                                                   |                                                                                                                                                                                                                           |                                                                                                                           |

# EAR3Q

Date: \_\_\_/\_\_\_/\_\_\_

ID \_\_\_\_\_

|                                                                                                                     |                                                                                                                                                                 |                                    |
|---------------------------------------------------------------------------------------------------------------------|-----------------------------------------------------------------------------------------------------------------------------------------------------------------|------------------------------------|
| शौच-क्रिया या अधोवायु निकलने के साथ और भी गंभीर हो गई?                                                              | 0 नहीं<br>1 शौचक्रिया के बाद<br>2 अधोवायु निकलने के बाद<br>3 दोनों                                                                                              |                                    |
| 24. जब यह दर्द या जलन शुरू हुई, तो क्या आपकी पैखाने की संख्या में बदलाव हुए (कम या ज्यादा)?                         | 1 कभी नहीं या बहुत कम<br>2 कभी कभी<br>3 अक्सर<br>4 ज्यादातर<br>5 हमेशा                                                                                          |                                    |
| 25. जब यह दर्द या जलन शुरू हुई, तो क्या आपको अक्सर नर्म या कड़ा मलत्याग हुआ?                                        | 1 कभी नहीं या बहुत कम<br>2 कभी कभी<br>3 अक्सर<br>4 ज्यादातर<br>5 हमेशा                                                                                          |                                    |
| 26. पिछले 3 महीनों में, कितनी बार आपको कष्टकारक मतली (जी मिचलाना) हुई?                                              | 0 कभी नहीं<br>1 महीने में एक दिन से कम<br>2 महीने में एक दिन<br>3 महीने में दो से तीन दिन<br>4 हफ्ते में एक दिन<br>5 हफ्ते में एक दिन से ज्यादा बार<br>6 हर दिन | प्रश्न 28 पर जाएँ( यदि उत्तर 0 है) |
| 27. क्या यह मतली (जी मिचलाना) की समस्या 6 महीने या इससे लम्बे समय से हुई?                                           | 0 नहीं<br>1 हाँ                                                                                                                                                 |                                    |
| 28. पिछले 3 महीनों में, कितनी बार आपको उल्टियां हुईं?                                                               | 0 कभी नहीं<br>1 महीने में एक दिन से कम<br>2 महीने में एक दिन<br>3 महीने में दो से तीन दिन<br>4 हफ्ते में एक दिन<br>5 हफ्ते में एक दिन से ज्यादा बार<br>6 हर दिन | प्रश्न 33 पर जाएँ( यदि उत्तर 0 है) |
| 29. क्या आपको यह उल्टियों की समस्या 6 महीनों या इससे लम्बे समय से है।?                                              | 0 नहीं<br>1 हाँ                                                                                                                                                 |                                    |
| 30. क्या आपने खुद को उल्टी कराई?                                                                                    | 1 कभी नहीं या बहुत कम<br>2 कभी कभी<br>3 अक्सर<br>4 ज्यादातर<br>5 हमेशा                                                                                          |                                    |
| 31. क्या आपको पिछले वर्ष में और अन्य कारणों से उल्टियां होती थीं जो कुछ दिनों तक होती रहती थीं और फिर रूक जाती थीं? | 1 कभी नहीं या बहुत कम<br>2 कभी कभी<br>3 अक्सर<br>4 ज्यादातर<br>5 हमेशा                                                                                          | सीधे प्रश्न 33 पर जाएँ             |

# EAR3Q

Date: \_\_\_/\_\_\_/\_\_\_

ID \_\_\_\_\_

|                                                                                                                                                          |                                                                                                                                                                              |                                           |
|----------------------------------------------------------------------------------------------------------------------------------------------------------|------------------------------------------------------------------------------------------------------------------------------------------------------------------------------|-------------------------------------------|
| <p>32. क्या पिछले वर्ष के दौरान आपको कम से कम तीन बार उल्टियों के दौर का सामना करना पड़ा।</p>                                                            | <p>0 नहीं<br/>1 हाँ</p>                                                                                                                                                      |                                           |
| <p>33. पिछले 3 महीनों में, कितनी बार आपके मुँह में भोजन वापस आया?</p>                                                                                    | <p>0 कभी नहीं<br/>1 महीने में एक दिन से कम<br/>2 महीने में एक दिन<br/>3 महीने में दो से तीन दिन<br/>4 हफ्ते में एक दिन<br/>5 हफ्ते में एक दिन से ज्यादा बार<br/>6 हर दिन</p> | <p>प्रश्न 39 पर जाएँ( यदि उत्तर 0 है)</p> |
| <p>34. क्या आपको यह समस्या (मुँह में भोजन का वापस आ जाना) 6 महीनों या इससे लम्बे समय से है।?</p>                                                         | <p>0 नहीं<br/>1 हाँ</p>                                                                                                                                                      |                                           |
| <p>35. जब आपके मुँह में भोजन वापस आया, तो क्या आपके द्वारा इसे फिर से निगले जाने या थूक दिए जाने से पहले यह अक्सर आपके मुँह में कुछ देर तक रुका रहा?</p> | <p>1 कभी नहीं या बहुत कम<br/>2 कभी कभी<br/>3 अक्सर<br/>4 ज्यादातर<br/>5 हमेशा</p>                                                                                            |                                           |
| <p>36. क्या आपको मुँह में भोजन वापस आने से पहले उबकाई (खाने का उठना) महसूस हुआ?</p>                                                                      | <p>1 कभी नहीं या बहुत कम<br/>2 कभी कभी<br/>3 अक्सर<br/>4 ज्यादातर<br/>5 हमेशा</p>                                                                                            |                                           |
| <p>37. जब आपके मुँह में भोजन वापस आ गया, तो कितनी बार आपने उल्टी की या आपके पेट में गड़बड़ी महसूस की?</p>                                                | <p>1 कभी नहीं या बहुत कम<br/>2 कभी कभी<br/>3 अक्सर<br/>4 ज्यादातर<br/>5 हमेशा</p>                                                                                            |                                           |
| <p>38. क्या आपके मुँह में भोजन वापस आना रुक गया जब यह खट्टा या अम्लीय हो गया?</p>                                                                        | <p>1 कभी नहीं या बहुत कम<br/>2 कभी कभी<br/>3 अक्सर<br/>4 ज्यादातर<br/>5 हमेशा</p>                                                                                            |                                           |
| <p>39. पिछले 3 महीनों में, कितनी बार आपको कष्टकारक डकारों का अनुभव हुआ?</p>                                                                              | <p>0 कभी नहीं<br/>1 महीने में एक दिन से कम<br/>2 महीने में एक दिन<br/>3 महीने में दो से तीन दिन<br/>4 हफ्ते में एक दिन<br/>5 हफ्ते में एक दिन से ज्यादा बार<br/>6 हर दिन</p> | <p>प्रश्न 41 पर जाएँ( यदि उत्तर 0 है)</p> |
| <p>40. क्या यह कष्टदायी डकारें आना 6 महीने से अधिक समय पहले से आरंभ हुआ?<br/><br/>(a) क्या आपको खाने से पहले डकारें आती हैं ?</p>                        | <p>0 नहीं<br/>1 हाँ<br/><br/>0 नहीं</p>                                                                                                                                      |                                           |



# EAR3Q

Date: \_\_\_/\_\_\_/\_\_\_

ID \_\_\_\_\_

|                                                                                                                                                                                                                                                                                                                                                                                               |                                                                                                                                                                                                                                                                                                                                                                                                                                               |                                                                                                                                                          |
|-----------------------------------------------------------------------------------------------------------------------------------------------------------------------------------------------------------------------------------------------------------------------------------------------------------------------------------------------------------------------------------------------|-----------------------------------------------------------------------------------------------------------------------------------------------------------------------------------------------------------------------------------------------------------------------------------------------------------------------------------------------------------------------------------------------------------------------------------------------|----------------------------------------------------------------------------------------------------------------------------------------------------------|
| <p>(b) क्या आपको खाने के दौरान डकारें आती हैं ?</p> <p>(c) क्या आपको खाने के बाद डकार आती हैं ?</p> <p>d) क्या डकारों का आपके खाने (आहारों) से संबंध है?</p> <p>e) आमतौर से डकारें कितनी गंभीर रहीं?</p> <p>f) क्या यह डकारों की परेशानी, दिए गए कारणों के बाद आमतौर से बेहतर हो गई?</p> <p>g) क्या डकारें, ..... के साथ ही आती हैं</p> <p>h) क्या डकारों में आपको ..... से राहत मिलती है</p> | <p>1 हाँ</p> <p>0 नहीं</p> <p>1 हाँ</p> <p>0 नहीं</p> <p>1 हाँ</p> <p>0 नहीं</p> <p>1 हाँ</p> <p>1 बहुत हल्का<br/>2 हल्का<br/>3 सामान्य<br/>4 गंभीर<br/>5 बहुत गंभीर</p> <p>1 शौच किया<br/>2 अधोवायु निकलना<br/>3 भोजन</p> <p>1 सूजन<br/>2 पेट दर्द<br/>3 अम्लशूल<br/>4 भोजन का मुँह में आ जाना<br/>5 तरल का मुँह में आ जाना</p> <p>1 भोजन<br/>2 अधोवायु निकलना<br/>3 शौच किया के बाद<br/>4 एन्टासिड या गैस की दवा उपर्युक्त में कोई नहीं</p> |                                                                                                                                                          |
| <p>41. पिछले 3 महीनों में, कितनी बार आपको अक्सर आपके पेट में कहीं भी परेशानी या दर्द महसूस हुआ?</p> <p>(b) दाईं ओर दिए आरेख में संकेत करके पेट में परेशानी या दर्द कहाँ स्थित है। यदि परेशानी या दर्द एक से ज्यादा जगह पर है तो केवल उस सीान पर संकेत करें जहाँपर सबसे ज्यादा परेशानी है।</p>                                                                                                 | <p>0 कभी नहीं</p> <p>1 महीने में एक दिन से कम</p> <p>2 महीने में एक दिन</p> <p>3 महीने में दो से तीन दिन</p> <p>4 हफ्ते में एक दिन</p> <p>5 हफ्ते में एक दिन से ज्यादा बार</p> <p>6 हर दिन</p>                                                                                                                                                                                                                                                | <p><b>प्रश्न 52 पर जाएँ( यदि उत्तर 0 है)</b></p> <p><b>(b)</b></p> 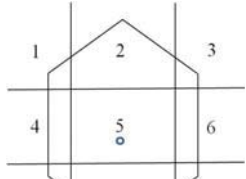 |

# EAR3Q

Date: \_\_\_/\_\_\_/\_\_\_

ID \_\_\_\_\_

|                                                                                                                                                                                                          |                                                                                                                                                                     |  |
|----------------------------------------------------------------------------------------------------------------------------------------------------------------------------------------------------------|---------------------------------------------------------------------------------------------------------------------------------------------------------------------|--|
|                                                                                                                                                                                                          |                                                                                                                                                                     |  |
| <p>42. क्या आपको केवल दर्द (असुविधा नहीं या असुविधा और दर्द दोनों) महसूस हुआ?</p> <p>a) क्या आपको महसूस हुआ</p>                                                                                          | <p>1 कभी नहीं या बहुत कम<br/>2 कभी कभी<br/>3 अक्सर<br/>4 ज्यादातर<br/>5 हमेशा</p> <p>1 केवल दर्द<br/>2 केवल असुविधा<br/>3 दर्द और असुविधा</p>                       |  |
| <p>43. महिलाओं के लिए: क्या यह असुविधा या दर्द आपको केवल अपने मासिक रक्तस्राव के समय महसूस हुई और इसके अलावा कभी आपने इसका अनुभव नहीं किया?</p>                                                          | <p>0 नहीं</p> <p>1 हाँ</p> <p>2 ये मुझ पर लागू नहीं होता है क्योंकि मेरी रजोनिवृत्ति हो चुकी है या मैं पुरुष हूँ</p>                                                |  |
| <p>44. इस दर्द की वजह से आपको अपने दैनिक क्रियाकलापों में कौन सी बाधाओं का सामना करना पड़ा या आपके दैनिक कार्य किस प्रकार प्रभावित हुए? (उदाहरण के लिए कार्य, घरेलू क्रियाकलाप और सामाजिक कार्यक्रम)</p> | <p>1 कभी नहीं या बहुत कम<br/>2 कभी कभी<br/>3 अक्सर<br/>4 ज्यादातर<br/>5 हमेशा</p>                                                                                   |  |
| <p>45. क्या आपको यह असुविधा या दर्द 6 महीनों या इससे भी लम्बे समय से है?</p>                                                                                                                             | <p>0 नहीं</p> <p>1 हाँ</p>                                                                                                                                          |  |
| <p>46. शौच-क्रिया के बाद, कितनी बार यह दर्द या असुविधा कम या बंद हुई?</p> <p>a) शौच-क्रिया के बाद, कितनी बार यह असुविधा या दर्द और भी बढ़ गया?</p>                                                       | <p>1 कभी नहीं या बहुत कम<br/>2 कभी कभी<br/>3 अक्सर<br/>4 ज्यादातर<br/>5 हमेशा</p> <p>1 कभी नहीं या बहुत कम<br/>2 कभी कभी<br/>3 अक्सर<br/>4 ज्यादातर<br/>5 हमेशा</p> |  |

# EAR3Q

Date: \_\_\_/\_\_\_/\_\_\_

ID \_\_\_\_\_

|                                                                                                                                                    |                                                                                                            |  |
|----------------------------------------------------------------------------------------------------------------------------------------------------|------------------------------------------------------------------------------------------------------------|--|
|                                                                                                                                                    |                                                                                                            |  |
| 47. इस असुविधा या दर्द के शुरू होने पर क्या आप बार-बार शौच-क्रिया के लिए जाना पड़ा?                                                                | 1 कभी नहीं या बहुत कम<br>2 कभी कभी<br>3 अक्सर<br>4 ज्यादातर<br>5 हमेशा                                     |  |
| 48. इस असुविधा या दर्द के शुरू होने पर क्या आपकी शौच-क्रिया पहले से भी कम हो गई?                                                                   | 1 कभी नहीं या बहुत कम<br>2 कभी कभी<br>3 अक्सर<br>4 ज्यादातर<br>5 हमेशा                                     |  |
| 49. इस असुविधा या दर्द के शुरू होने पर क्या आपका मल (शौच-क्रिया) पतला हो गया?                                                                      | 1 कभी नहीं या बहुत कम<br>2 कभी कभी<br>3 अक्सर<br>4 ज्यादातर<br>5 हमेशा                                     |  |
| 50. इस असुविधा या दर्द के शुरू होने पर क्या आपका मल (शौच-क्रिया) कठोर हो गया?                                                                      | 1 कभी नहीं या बहुत कम<br>2 कभी कभी<br>3 अक्सर<br>4 ज्यादातर<br>5 हमेशा                                     |  |
| 51. कितनी बार चलने-फिरने या स्थितियां बदलने से यह दर्द या असुविधा दूर हो जाती थी?<br>* प्रश्न 52 पर जाने से पहले आप 5 मिनट का विश्राम ले सकते हैं। | 1 कभी नहीं या बहुत कम<br>2 कभी कभी<br>3 अक्सर<br>4 ज्यादातर<br>5 हमेशा                                     |  |
| 52. पिछले 3 महीनों में, आप कितनी बार एक सप्ताह में शौचक्रिया के लिए तीन बार (0-2) से भी कम गए?                                                     | 1 कभी नहीं या बहुत कम<br>2 कभी कभी<br>3 अक्सर<br>4 ज्यादातर<br>5 हमेशा<br>6 याद करने या तय करने में कठिनाई |  |
| 53. पिछले 3 महीनों में, आपको कितनी बार कठोर या लसदार मल हुआ?                                                                                       | 1 कभी नहीं या बहुत कम<br>2 कभी कभी<br>3 अक्सर                                                              |  |

# EAR3Q

Date: \_\_\_/\_\_\_/\_\_\_

ID \_\_\_\_\_

|                                                                                                                                                                                                                                                                                                                                              |                                                                                                                                                                                                                                                                  |  |
|----------------------------------------------------------------------------------------------------------------------------------------------------------------------------------------------------------------------------------------------------------------------------------------------------------------------------------------------|------------------------------------------------------------------------------------------------------------------------------------------------------------------------------------------------------------------------------------------------------------------|--|
|                                                                                                                                                                                                                                                                                                                                              | <p>4 ज्यादातर<br/>5 हमेशा</p>                                                                                                                                                                                                                                    |  |
| <p>54. पिछले 3 महीनों में, कितनी बार शौच-क्रिया के दौरान आपको ताकत लगानी पड़ी?</p>                                                                                                                                                                                                                                                           | <p>1 कभी नहीं या बहुत कम<br/>2 कभी कभी<br/>3 अक्सर<br/>4 ज्यादातर<br/>5 हमेशा</p>                                                                                                                                                                                |  |
| <p>55. पिछले 3 महीनों में, कितनी बार शौच-क्रिया के बाद आपने यह महसूस किया कि आपका मल त्याग अपूर्ण रह जाता है?</p>                                                                                                                                                                                                                            | <p>1 कभी नहीं या बहुत कम<br/>2 कभी कभी<br/>3 अक्सर<br/>4 ज्यादातर<br/>5 हमेशा</p>                                                                                                                                                                                |  |
| <p>56. पिछले 3 महीनों में, कितनी बार शौच-क्रिया के बाद आपने यह महसूस किया कि मल का विसर्जन (अर्थात रुका होना) नहीं हो सका?</p> <p>a) क्या मल त्याग करने में आपको कठिनाई हुई क्योंकि यह था.....।</p> <p>b) क्या मल त्याग करने में आपको कठिनाई हुई क्योंकि .....</p>                                                                           | <p>1 कभी नहीं या बहुत कम<br/>2 कभी कभी<br/>3 अक्सर<br/>4 ज्यादातर<br/>5 हमेशा</p> <p>1 बहुत बड़ा<br/>2 बहुत पतला<br/>3 बहुत कठोर<br/>4 बहुत सूखा<br/>5 उपर्युक्त में कोई नहीं</p> <p>1 ज्यादा प्रयास नहीं<br/>2 हल्का दाब<br/>3 दाब में समर्थ लेकिन अटकता है</p> |  |
| <p>57. पिछले 3 महीनों में, शौच-क्रिया पूरी करने के लिए कितनी बार आपको अपनी गुदा या इसके आस-पास दबाना या मल हटाना पड़ा?</p> <p>a) पिछले 3 महीनों में, मल हटाने के लिए आपको निम्नलिखित में से क्या करना पड़ा?</p> <p>i) अपनी उंगली अंदर डालना</p> <p>ii) पानी से बहाना</p> <p>iii) सपोजिटरी प्रविष्ट कराना</p> <p>iv) एनिमा प्रविष्ट कराना</p> | <p>1 कभी नहीं या बहुत कम<br/>2 कभी कभी<br/>3 अक्सर<br/>4 ज्यादातर<br/>5 हमेशा</p> <p>0 हॉ<br/>1 नहीं<br/>0 हॉ<br/>1 नहीं<br/>0 हॉ<br/>1 नहीं<br/>0 हॉ<br/>1 नहीं</p>                                                                                             |  |
| <p>58. पिछले 3 महीनों में, कितनी बार आपको शौच-क्रिया के दौरान (आपके शरीर से) आराम से मल बाहर निकालने (मलत्याग करने) की क्रिया में कठिनाई महसूस हुई।</p>                                                                                                                                                                                      | <p>1 कभी नहीं या बहुत कम<br/>2 कभी कभी<br/>3 अक्सर<br/>4 ज्यादातर<br/>5 हमेशा</p>                                                                                                                                                                                |  |

# EAR3Q

Date: \_\_\_/\_\_\_/\_\_\_

ID \_\_\_\_\_

|                                                                                                                                                                                                                                                                                                                                                                                                                                                                                                                                                  |                                                                                                                                                                                                                      |                                                                                                                                                                                                                                                                                                                                                                                                                                                                                                                                                                                                                                                                                                                                                                                                                                                                                                                                                                                                                                                                                                                                                                                                                                                                                                                                                                                                                                                                                                                                                                                                                                                                                                                                                                                                                                                                                                                                                                                                                                         |                                                                                       |                                              |   |                                                                                       |                          |   |                                                                                       |                                             |   |                                                                                       |                                      |   |                                                                                       |                                                 |   |                                                                                       |                                                |   |                                                                                       |                         |   |                 |  |  |
|--------------------------------------------------------------------------------------------------------------------------------------------------------------------------------------------------------------------------------------------------------------------------------------------------------------------------------------------------------------------------------------------------------------------------------------------------------------------------------------------------------------------------------------------------|----------------------------------------------------------------------------------------------------------------------------------------------------------------------------------------------------------------------|-----------------------------------------------------------------------------------------------------------------------------------------------------------------------------------------------------------------------------------------------------------------------------------------------------------------------------------------------------------------------------------------------------------------------------------------------------------------------------------------------------------------------------------------------------------------------------------------------------------------------------------------------------------------------------------------------------------------------------------------------------------------------------------------------------------------------------------------------------------------------------------------------------------------------------------------------------------------------------------------------------------------------------------------------------------------------------------------------------------------------------------------------------------------------------------------------------------------------------------------------------------------------------------------------------------------------------------------------------------------------------------------------------------------------------------------------------------------------------------------------------------------------------------------------------------------------------------------------------------------------------------------------------------------------------------------------------------------------------------------------------------------------------------------------------------------------------------------------------------------------------------------------------------------------------------------------------------------------------------------------------------------------------------------|---------------------------------------------------------------------------------------|----------------------------------------------|---|---------------------------------------------------------------------------------------|--------------------------|---|---------------------------------------------------------------------------------------|---------------------------------------------|---|---------------------------------------------------------------------------------------|--------------------------------------|---|---------------------------------------------------------------------------------------|-------------------------------------------------|---|---------------------------------------------------------------------------------------|------------------------------------------------|---|---------------------------------------------------------------------------------------|-------------------------|---|-----------------|--|--|
| <p>59. क्या प्रश्न 52- 57 में सूचीबद्ध कब्ज का कोई लक्षण पिछले 6 माह से पहले शुरू हुआ?</p>                                                                                                                                                                                                                                                                                                                                                                                                                                                       | <p>0 नहीं<br/>1 हाँ</p>                                                                                                                                                                                              |                                                                                                                                                                                                                                                                                                                                                                                                                                                                                                                                                                                                                                                                                                                                                                                                                                                                                                                                                                                                                                                                                                                                                                                                                                                                                                                                                                                                                                                                                                                                                                                                                                                                                                                                                                                                                                                                                                                                                                                                                                         |                                                                                       |                                              |   |                                                                                       |                          |   |                                                                                       |                                             |   |                                                                                       |                                      |   |                                                                                       |                                                 |   |                                                                                       |                                                |   |                                                                                       |                         |   |                 |  |  |
| <p>60. पिछले 3 महीनों में, कितनी बार आप एक दिन में 4 या इससे अधिक बार शौच-क्रिया के लिए गए?</p>                                                                                                                                                                                                                                                                                                                                                                                                                                                  | <p>1 कभी नहीं या बहुत कम<br/>2 कभी कभी<br/>3 अक्सर<br/>4 ज्यादातर<br/>5 हमेशा<br/>6 उत्तर देने में कठनाई</p>                                                                                                         |                                                                                                                                                                                                                                                                                                                                                                                                                                                                                                                                                                                                                                                                                                                                                                                                                                                                                                                                                                                                                                                                                                                                                                                                                                                                                                                                                                                                                                                                                                                                                                                                                                                                                                                                                                                                                                                                                                                                                                                                                                         |                                                                                       |                                              |   |                                                                                       |                          |   |                                                                                       |                                             |   |                                                                                       |                                      |   |                                                                                       |                                                 |   |                                                                                       |                                                |   |                                                                                       |                         |   |                 |  |  |
| <p>61. पिछले 3 महीनों में, कितनी बार आपको पतला, लसदार या पानी जैसे मल हुआ?</p>                                                                                                                                                                                                                                                                                                                                                                                                                                                                   | <p>1 कभी नहीं या बहुत कम<br/>2 कभी कभी<br/>3 अक्सर<br/>4 ज्यादातर<br/>5 हमेशा</p>                                                                                                                                    |                                                                                                                                                                                                                                                                                                                                                                                                                                                                                                                                                                                                                                                                                                                                                                                                                                                                                                                                                                                                                                                                                                                                                                                                                                                                                                                                                                                                                                                                                                                                                                                                                                                                                                                                                                                                                                                                                                                                                                                                                                         |                                                                                       |                                              |   |                                                                                       |                          |   |                                                                                       |                                             |   |                                                                                       |                                      |   |                                                                                       |                                                 |   |                                                                                       |                                                |   |                                                                                       |                         |   |                 |  |  |
| <p>62. पिछले 3 महीनों में, कितनी बार आपके मल का कम से कम तीन चौथाई भाग ढीला, लसदार या पानी जैसा था?</p> <p>a) आप अपनी पैखाने की आदत के बारे में कैसा महसूस करते हैं?</p> <p>b) एक सप्ताह में औसतन आप कितनी बार मल त्याग करते हैं?</p> <p>*c) आमतौर पर विसर्जित होने वाले मल के प्रकार को चिन्हित करें</p> <p>i) जब आप अच्छा महसूस करते हैं<br/>ii) जब आपको कब्ज हो जाता है<br/>iii) जब आपको दस्त आने लगते हैं<br/>iv) अधिकांश बार<br/>v) खराब महसूस होता है</p> <p>*ब्रिस्टॉल मल मापनी प्रपत्र देखें और दिए गए स्थान में उपयुक्त संख्या भरें</p> | <p>0 हाँ<br/>1 नहीं<br/>2 तय करने में कठिनाई</p> <p>1 कब्ज<br/>2 डायरिया दस्त आना<br/>3 कभी दस्त कभी कब्ज<br/>4 उपर्युक्त में कोई नहीं</p> <p>_____ नं /हफते</p> <p>बी एस एस नं</p> <p>1<br/>2<br/>3<br/>4<br/>5</p> | <p style="text-align: center;">ब्रिस्टॉल मल मापनी प्रपत्र (BSS)</p> <table border="1" style="width: 100%; border-collapse: collapse;"> <tr> <td style="text-align: center;"></td> <td style="font-size: small;">Separate hard lumps, like nuts, hard to pass</td> <td style="text-align: center;">1</td> </tr> <tr> <td style="text-align: center;"></td> <td style="font-size: small;">Sausage-shaped but lumpy</td> <td style="text-align: center;">2</td> </tr> <tr> <td style="text-align: center;"></td> <td style="font-size: small;">Like sausage but with cracks on its surface</td> <td style="text-align: center;">3</td> </tr> <tr> <td style="text-align: center;"></td> <td style="font-size: small;">Like sausage or snake, smooth &amp; soft</td> <td style="text-align: center;">4</td> </tr> <tr> <td style="text-align: center;"></td> <td style="font-size: small;">Soft blobs with clear cut edges (passed easily)</td> <td style="text-align: center;">5</td> </tr> <tr> <td style="text-align: center;"></td> <td style="font-size: small;">Fluffy pieces with ragged edges, a mushy stool</td> <td style="text-align: center;">6</td> </tr> <tr> <td style="text-align: center;"></td> <td style="font-size: small;">Watery, no solid pieces</td> <td style="text-align: center;">7</td> </tr> <tr> <td colspan="2" style="text-align: center;">ENTIRELY LIQUID</td> <td></td> </tr> </table> |  | Separate hard lumps, like nuts, hard to pass | 1 |  | Sausage-shaped but lumpy | 2 |  | Like sausage but with cracks on its surface | 3 |  | Like sausage or snake, smooth & soft | 4 |  | Soft blobs with clear cut edges (passed easily) | 5 |  | Fluffy pieces with ragged edges, a mushy stool | 6 |  | Watery, no solid pieces | 7 | ENTIRELY LIQUID |  |  |
|                                                                                                                                                                                                                                                                                                                                                                                                                                                             | Separate hard lumps, like nuts, hard to pass                                                                                                                                                                         | 1                                                                                                                                                                                                                                                                                                                                                                                                                                                                                                                                                                                                                                                                                                                                                                                                                                                                                                                                                                                                                                                                                                                                                                                                                                                                                                                                                                                                                                                                                                                                                                                                                                                                                                                                                                                                                                                                                                                                                                                                                                       |                                                                                       |                                              |   |                                                                                       |                          |   |                                                                                       |                                             |   |                                                                                       |                                      |   |                                                                                       |                                                 |   |                                                                                       |                                                |   |                                                                                       |                         |   |                 |  |  |
|                                                                                                                                                                                                                                                                                                                                                                                                                                                             | Sausage-shaped but lumpy                                                                                                                                                                                             | 2                                                                                                                                                                                                                                                                                                                                                                                                                                                                                                                                                                                                                                                                                                                                                                                                                                                                                                                                                                                                                                                                                                                                                                                                                                                                                                                                                                                                                                                                                                                                                                                                                                                                                                                                                                                                                                                                                                                                                                                                                                       |                                                                                       |                                              |   |                                                                                       |                          |   |                                                                                       |                                             |   |                                                                                       |                                      |   |                                                                                       |                                                 |   |                                                                                       |                                                |   |                                                                                       |                         |   |                 |  |  |
|                                                                                                                                                                                                                                                                                                                                                                                                                                                             | Like sausage but with cracks on its surface                                                                                                                                                                          | 3                                                                                                                                                                                                                                                                                                                                                                                                                                                                                                                                                                                                                                                                                                                                                                                                                                                                                                                                                                                                                                                                                                                                                                                                                                                                                                                                                                                                                                                                                                                                                                                                                                                                                                                                                                                                                                                                                                                                                                                                                                       |                                                                                       |                                              |   |                                                                                       |                          |   |                                                                                       |                                             |   |                                                                                       |                                      |   |                                                                                       |                                                 |   |                                                                                       |                                                |   |                                                                                       |                         |   |                 |  |  |
|                                                                                                                                                                                                                                                                                                                                                                                                                                                             | Like sausage or snake, smooth & soft                                                                                                                                                                                 | 4                                                                                                                                                                                                                                                                                                                                                                                                                                                                                                                                                                                                                                                                                                                                                                                                                                                                                                                                                                                                                                                                                                                                                                                                                                                                                                                                                                                                                                                                                                                                                                                                                                                                                                                                                                                                                                                                                                                                                                                                                                       |                                                                                       |                                              |   |                                                                                       |                          |   |                                                                                       |                                             |   |                                                                                       |                                      |   |                                                                                       |                                                 |   |                                                                                       |                                                |   |                                                                                       |                         |   |                 |  |  |
|                                                                                                                                                                                                                                                                                                                                                                                                                                                             | Soft blobs with clear cut edges (passed easily)                                                                                                                                                                      | 5                                                                                                                                                                                                                                                                                                                                                                                                                                                                                                                                                                                                                                                                                                                                                                                                                                                                                                                                                                                                                                                                                                                                                                                                                                                                                                                                                                                                                                                                                                                                                                                                                                                                                                                                                                                                                                                                                                                                                                                                                                       |                                                                                       |                                              |   |                                                                                       |                          |   |                                                                                       |                                             |   |                                                                                       |                                      |   |                                                                                       |                                                 |   |                                                                                       |                                                |   |                                                                                       |                         |   |                 |  |  |
|                                                                                                                                                                                                                                                                                                                                                                                                                                                             | Fluffy pieces with ragged edges, a mushy stool                                                                                                                                                                       | 6                                                                                                                                                                                                                                                                                                                                                                                                                                                                                                                                                                                                                                                                                                                                                                                                                                                                                                                                                                                                                                                                                                                                                                                                                                                                                                                                                                                                                                                                                                                                                                                                                                                                                                                                                                                                                                                                                                                                                                                                                                       |                                                                                       |                                              |   |                                                                                       |                          |   |                                                                                       |                                             |   |                                                                                       |                                      |   |                                                                                       |                                                 |   |                                                                                       |                                                |   |                                                                                       |                         |   |                 |  |  |
|                                                                                                                                                                                                                                                                                                                                                                                                                                                             | Watery, no solid pieces                                                                                                                                                                                              | 7                                                                                                                                                                                                                                                                                                                                                                                                                                                                                                                                                                                                                                                                                                                                                                                                                                                                                                                                                                                                                                                                                                                                                                                                                                                                                                                                                                                                                                                                                                                                                                                                                                                                                                                                                                                                                                                                                                                                                                                                                                       |                                                                                       |                                              |   |                                                                                       |                          |   |                                                                                       |                                             |   |                                                                                       |                                      |   |                                                                                       |                                                 |   |                                                                                       |                                                |   |                                                                                       |                         |   |                 |  |  |
| ENTIRELY LIQUID                                                                                                                                                                                                                                                                                                                                                                                                                                                                                                                                  |                                                                                                                                                                                                                      |                                                                                                                                                                                                                                                                                                                                                                                                                                                                                                                                                                                                                                                                                                                                                                                                                                                                                                                                                                                                                                                                                                                                                                                                                                                                                                                                                                                                                                                                                                                                                                                                                                                                                                                                                                                                                                                                                                                                                                                                                                         |                                                                                       |                                              |   |                                                                                       |                          |   |                                                                                       |                                             |   |                                                                                       |                                      |   |                                                                                       |                                                 |   |                                                                                       |                                                |   |                                                                                       |                         |   |                 |  |  |
| <p>63. पिछले 3 महीनों में, क्या अक्सर आपको शौच-क्रिया के लिए प्रसाधन की ओर भागना पड़ता था?</p> <p>a. यह कब-कब होता है?</p>                                                                                                                                                                                                                                                                                                                                                                                                                       | <p>1 कभी नहीं या बहुत कम<br/>2 कभी कभी<br/>3 अक्सर<br/>4 ज्यादातर<br/>5 हमेशा</p> <p>1 भोजन के बाद<br/>2 जब आप भारी फूला हुआ महसूस करते हैं<br/>3 जब आपको बाहरी पेटदर्द होता</p>                                     |                                                                                                                                                                                                                                                                                                                                                                                                                                                                                                                                                                                                                                                                                                                                                                                                                                                                                                                                                                                                                                                                                                                                                                                                                                                                                                                                                                                                                                                                                                                                                                                                                                                                                                                                                                                                                                                                                                                                                                                                                                         |                                                                                       |                                              |   |                                                                                       |                          |   |                                                                                       |                                             |   |                                                                                       |                                      |   |                                                                                       |                                                 |   |                                                                                       |                                                |   |                                                                                       |                         |   |                 |  |  |

# EAR3Q

Date: \_\_\_/\_\_\_/\_\_\_

ID \_\_\_\_\_

|                                                                                                                                                                                                                                                                                                                                                                                                                                                                                        |                                                                                                                                                                                                                                                |                                                                                                                                             |
|----------------------------------------------------------------------------------------------------------------------------------------------------------------------------------------------------------------------------------------------------------------------------------------------------------------------------------------------------------------------------------------------------------------------------------------------------------------------------------------|------------------------------------------------------------------------------------------------------------------------------------------------------------------------------------------------------------------------------------------------|---------------------------------------------------------------------------------------------------------------------------------------------|
| <p>b. आप गंभीरता को कैसे परिभाषित करते हैं?</p>                                                                                                                                                                                                                                                                                                                                                                                                                                        | <p>है<br/>4 जब आप व्यग्र या तनावग्रस्त होते हैं</p> <p>1 बहुत हल्का<br/>2 हल्का<br/>3 सामान्य<br/>4 गंभीर<br/>5 बहुत गंभीर</p>                                                                                                                 |                                                                                                                                             |
| <p>64. क्या पिछले 6 महीनों से भी अधिक समय से आपको बार-बार पतला, लसदार या पानी जैसा मल होता था?</p>                                                                                                                                                                                                                                                                                                                                                                                     | <p>0 नहीं<br/>1 हाँ</p>                                                                                                                                                                                                                        |                                                                                                                                             |
| <p>65. पिछले 3 महीनों में, क्या अक्सर आपकी शौच-क्रिया में आंव या लसलसा जैसा पदार्थ आता था?</p>                                                                                                                                                                                                                                                                                                                                                                                         | <p>1 कभी नहीं या बहुत कम<br/>2 कभी कभी<br/>3 अक्सर<br/>4 ज्यादातर<br/>5 हमेशा</p>                                                                                                                                                              |                                                                                                                                             |
| <p>66. पिछले 3 महीनों में, क्या अक्सर आपको पेट में तनाव या फूलापन महसूस हुआ?</p> <p>(a) दाईं ओर दिए आरेख में संकेत करे कि तनाव या फूलापन कहाँ स्थित है। यदि तनाव या फूलापन एक से ज्यादा जगह पर है तो केवल उस सीन पर संकेत करें जहाँपर सबसे ज्यादा परेशानी है।</p> <p>(b) क्या मलत्याग के बाद पेट के तनाव या फूलापन में आराम हुआ ?</p> <p>(c) क्या ये तनाव या फूलापन लगातार कम या ज्यादा मल से संबन्धित था ?</p> <p>(d) क्या ये तनाव या फूलापन कठोर अथवा मुलायम मल से संबन्धित था ?</p> | <p>0 कभी नहीं<br/>1 महीने में एक दिन से कम<br/>2 महीने में एक दिन<br/>3 महीने में दो से तीन दिन<br/>4 हफ्ते में एक दिन<br/>5 हफ्ते में एक दिन से ज्यादा बार<br/>6 हर दिन</p> <p>0 नहीं<br/>1 हाँ<br/>0 नहीं<br/>1 हाँ<br/>0 नहीं<br/>1 हाँ</p> | <p>प्रश्न 68 पर जाएँ( यदि उत्तर 0 है )</p> 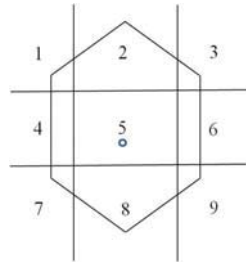 <p>(a)</p> |

# EAR3Q

Date: \_\_\_/\_\_\_/\_\_\_

ID \_\_\_\_\_

|                                                                                                                                                                                                                                                                                                         |                                                                                                                                                                              |                                                                                                                                          |
|---------------------------------------------------------------------------------------------------------------------------------------------------------------------------------------------------------------------------------------------------------------------------------------------------------|------------------------------------------------------------------------------------------------------------------------------------------------------------------------------|------------------------------------------------------------------------------------------------------------------------------------------|
| <p>67. क्या पेट में तनाव और फूलेपन के लक्षण आपमें पिछले 6 माह से पहले शुरू हुए?</p>                                                                                                                                                                                                                     | <p>0 नहीं<br/>1 हाँ</p>                                                                                                                                                      |                                                                                                                                          |
| <p>68. पिछले 6 माह में, अपने पेट के ऊपर के मध्य या दहिने हिस्से में आपको कितनी बार स्थाई रूप से दर्द हुआ?(दाईं ओर दिए आरेख में संकेत करें)</p> <p>(a) दाईं ओर आरेख में संकेत करें कि दर्द कहाँ स्थित है। यदि एक से ज्यादा जगह पर दर्द है तो केवल उस स्थान पर संकेत करें जहाँपर सबसे ज्यादा दर्द है।</p> | <p>0 कभी नहीं<br/>1 महीने में एक दिन से कम<br/>2 महीने में एक दिन<br/>3 महीने में दो से तीन दिन<br/>4 हफ्ते में एक दिन<br/>5 हफ्ते में एक दिन से ज्यादा बार<br/>6 हर दिन</p> | <p>प्रश्न 75 पर जाएँ (यदि उत्तर 0 है)</p> <p>(a)</p> 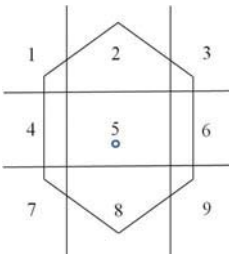 |
| <p>69. क्या यह दर्द 30 मिनट या इससे भी अधिक देर तक रहता है?</p>                                                                                                                                                                                                                                         | <p>1 कभी नहीं या बहुत कम<br/>2 कभी कभी<br/>3 अक्सर<br/>4 ज्यादातर<br/>5 हमेशा</p>                                                                                            |                                                                                                                                          |
| <p>70. क्या यह दर्द स्थाई रूप से गंभीर स्तर तक पहुंच गया?</p>                                                                                                                                                                                                                                           | <p>1 कभी नहीं या बहुत कम<br/>2 कभी कभी<br/>3 अक्सर<br/>4 ज्यादातर<br/>5 हमेशा</p>                                                                                            |                                                                                                                                          |
| <p>71. क्या यह दर्द समय अंतरालों के बीच पूरी तरह से चला जाता है?</p>                                                                                                                                                                                                                                    | <p>1 कभी नहीं या बहुत कम<br/>2 कभी कभी<br/>3 अक्सर<br/>4 ज्यादातर<br/>5 हमेशा</p>                                                                                            |                                                                                                                                          |
| <p>72. क्या इस दर्द से आपके सामान्य क्रियाकलाप रुक गए, या आपको तत्काल दिखाने के लिए डाक्टर के पास जाना पड़ा या आप आपातकालीन विभाग में जाना पड़ा?</p>                                                                                                                                                    | <p>1 कभी नहीं या बहुत कम<br/>2 कभी कभी<br/>3 अक्सर<br/>4 ज्यादातर<br/>5 हमेशा</p>                                                                                            |                                                                                                                                          |
| <p>73. क्या आपका पित्ताशय निकाल दिया गया था?</p>                                                                                                                                                                                                                                                        | <p>0 नहीं<br/>1 हाँ</p>                                                                                                                                                      | <p>सीधे प्रश्न 75 पर जाएं</p>                                                                                                            |
| <p>74. पित्ताशय निकालने के बाद आपको कितनी बार दर्द हुआ?</p>                                                                                                                                                                                                                                             | <p>1 कभी नहीं या बहुत कम<br/>2 कभी कभी<br/>3 अक्सर<br/>4 ज्यादातर<br/>5 हमेशा</p>                                                                                            |                                                                                                                                          |

# EAR3Q

Date: \_\_\_/\_\_\_/\_\_\_

ID \_\_\_\_\_

|                                                                                                              |                                                                                                                                                                                                                                                       |                                                  |
|--------------------------------------------------------------------------------------------------------------|-------------------------------------------------------------------------------------------------------------------------------------------------------------------------------------------------------------------------------------------------------|--------------------------------------------------|
| <p>75. अधोवायु (पाद) से आपको कितनी परेशानी होती है?</p>                                                      | <ol style="list-style-type: none"> <li>1 कभी नहीं या बहुत कम</li> <li>2 कभी कभी</li> <li>3 अक्सर</li> <li>4 ज्यादातर</li> <li>5 हमेशा</li> </ol>                                                                                                      |                                                  |
| <p>76. क्या आप अधोवायु (पाद) रोकने में असंयम हैं?</p>                                                        | <ol style="list-style-type: none"> <li>1 कभी नहीं या बहुत कम</li> <li>2 कभी कभी</li> <li>3 अक्सर</li> <li>4 ज्यादातर</li> <li>5 हमेशा</li> </ol>                                                                                                      |                                                  |
| <p>77. पिछले 3 महीनों में, आपको कितनी बार तरल या ठोस मल का रिसाव हुआ है?</p>                                 | <ol style="list-style-type: none"> <li>0 कभी नहीं</li> <li>1 महीने में एक दिन से कम</li> <li>2 महीने में एक दिन</li> <li>3 महीने में दो से तीन दिन</li> <li>4 हफ्ते में एक दिन</li> <li>5 हफ्ते में एक दिन से ज्यादा बार</li> <li>6 हर दिन</li> </ol> | <p><b>प्रश्न 80 पर जाएँ( यदि उत्तर 0 है)</b></p> |
| <p>78. पिछले 3 महीनों में, जब भी इस प्रकार रिसाव हुआ तो उसकी मात्रा क्या थी?</p>                             | <ol style="list-style-type: none"> <li>1 कम मात्रा (सिर्फ धब्बा)</li> <li>2 सामान्य मात्रा (धब्बे से ज्यादा पर शौच क्रिया से कम)</li> <li>3 ज्यादा मात्रा ;पूर्ण शौच क्रिया)</li> </ol>                                                               |                                                  |
| <p>79. पिछले वर्ष में, जब यह रिसाव हुआ तो इस रिसाव में क्या शामिल था?</p>                                    | <ol style="list-style-type: none"> <li>1 केवल तरल/कफ</li> <li>2 केवल मल</li> <li>3 तरल/कफ दोनों और मल</li> </ol>                                                                                                                                      |                                                  |
| <p>80. पिछले 3 महीनों में, शौच-क्रिया न होने पर गुदा या मलाशय में कितनी बार आपको दर्द या दबाव महसूस हुआ?</p> | <ol style="list-style-type: none"> <li>0 कभी नहीं</li> <li>1 महीने में एक दिन से कम</li> <li>2 महीने में एक दिन</li> <li>3 महीने में दो से तीन दिन</li> <li>4 हफ्ते में एक दिन</li> <li>5 हफ्ते में एक दिन से ज्यादा बार</li> <li>6 हर दिन</li> </ol> | <p><b>प्रश्न 84 पर जाएँ( यदि उत्तर 0 है)</b></p> |
| <p>81. दर्द या दबाव कितनी देर तक रहता था?</p>                                                                | <ol style="list-style-type: none"> <li>1 कुछ सेकेंड से 20 मिनट तक फिर पूर्णता गायब</li> <li>2 20 मिनट से ज्यादा और कई दिनों तक</li> </ol>                                                                                                             |                                                  |
| <p>82. क्या आपके गुदा या मलाशय में दर्द उत्पन्न होता था और उसके दिन भर के बाद गायब हो जाता था?</p>           | <ol style="list-style-type: none"> <li>0 नहीं</li> <li>1 हाँ</li> </ol>                                                                                                                                                                               |                                                  |
| <p>83. क्या गुदा नली या मलाशय में दर्द या दबाव पिछले 6 महीने से पहले शुरू हुआ?</p>                           | <ol style="list-style-type: none"> <li>0 नहीं</li> <li>1 हाँ</li> </ol>                                                                                                                                                                               |                                                  |



# EAR 3Q

Date: \_\_\_/\_\_\_/\_\_\_

ID \_\_\_\_\_

|                                                                                                                                     |                                                                                                                                                                                                                                                                                                                                                              |  |
|-------------------------------------------------------------------------------------------------------------------------------------|--------------------------------------------------------------------------------------------------------------------------------------------------------------------------------------------------------------------------------------------------------------------------------------------------------------------------------------------------------------|--|
| <p>84. पिछले 3 महीनों में, कितनी बार आपकी आवाज लगातार खराब या भारीपन बनी रही?</p>                                                   | <ol style="list-style-type: none"> <li>1 कभी नहीं या बहुत कम</li> <li>2 कभी कभी</li> <li>3 अक्सर</li> <li>4 ज्यादातर</li> <li>5 हमेशा</li> </ol>                                                                                                                                                                                                             |  |
| <p>85. पिछले 3 महीनों में, कितनी बार आपकी गर्दन या गले में स्थायी या बुरा दर्द बना रहा ?</p>                                        | <ol style="list-style-type: none"> <li>1 कभी नहीं या बहुत कम</li> <li>2 कभी कभी</li> <li>3 अक्सर</li> <li>4 ज्यादातर</li> <li>5 हमेशा</li> </ol>                                                                                                                                                                                                             |  |
| <p>86. पिछले 3 महीनों में, आपको कितनी बार शारीरिक श्रम के कारण छाती दर्द या गर्दन से जुड़ी समस्याओं में छाती दर्द का अनुभव हुआ?</p> | <ol style="list-style-type: none"> <li>1 कभी नहीं या बहुत कम</li> <li>2 कभी कभी</li> <li>3 अक्सर</li> <li>4 ज्यादातर</li> <li>5 हमेशा</li> </ol>                                                                                                                                                                                                             |  |
| <p>87. पिछले 3 महीनों में, आपको कितनी बार निगलने में कठिनाई हुई?</p>                                                                | <ol style="list-style-type: none"> <li>1 कभी नहीं या बहुत कम</li> <li>2 कभी कभी</li> <li>3 अक्सर</li> <li>4 ज्यादातर</li> <li>5 हमेशा</li> </ol>                                                                                                                                                                                                             |  |
| <p>88. क्या आप अपनी समस्या को लेकर डाक्टर से हुई अपनी पूर्व मुलाकातो से सन्तुष्ट है।</p>                                            | <ol style="list-style-type: none"> <li>1 हाँ</li> <li>2 नहीं, क्योंकि डाक्टर ने मेरी समस्या पर ध्यान नहीं दिया।</li> <li>3 नहीं, क्योंकि डाक्टर ने विस्तारपूर्वक जानकारी नहीं दी।</li> <li>4 नहीं, क्योंकि डाक्टर ने पूर्णता जाँच नहीं की।</li> <li>5. इस समस्या के लिए मैंने डॉक्टर को नहीं दिखाया</li> <li>6. नहीं, क्योंकि उपचार कारगर नहीं था</li> </ol> |  |

తారీఖు: \_\_\_/\_\_\_/\_\_\_

గుర్తింపు: \_\_\_\_\_

తేది నెల సంవత్సరము

- ఎప్పడూ లేదు
- 3 నెలల లోపు
- 3 నెలలకు పైబడి, 6 నెలలలోపు
- 6 నెలలకు పైబడి

|                                                                                                                                                                                     |                                                                                                                                                                                                                                         |                             |
|-------------------------------------------------------------------------------------------------------------------------------------------------------------------------------------|-----------------------------------------------------------------------------------------------------------------------------------------------------------------------------------------------------------------------------------------|-----------------------------|
| <p>1. గత 3 నెలలలో తరచుగా ఎన్నిమార్లు బరువుగా ఉన్నట్లు, నిండినట్లు లేదా ఏదైనా గొంతుకు అడ్డుపడినట్లు అనిపించింది ?</p>                                                                | <p>0. ఎప్పడూ లేదు →→→→</p> <p>1. నెలలో ఒక రోజు కన్నా తక్కువ.</p> <p>2. నెలలో ఒక రోజు.</p> <p>3. నెలలో రెండు లేదా మూడు రోజులు.</p> <p>4. వారంలో ఒక రోజు.</p> <p>5. వారంలో ఒక రోజు కన్నా ఎక్కువ.</p> <p>6. ప్రతీ రోజు</p>                 | <p>4వ ప్రశ్నకు వెళ్ళండి</p> |
| <p>2. ఈవిధమైన అనుభూతి 6 నెలలకు ఆ ముందుగాని కలిగినదా ?</p>                                                                                                                           | <p>0. అవును</p> <p>1. లేదు</p>                                                                                                                                                                                                          |                             |
| <p>3. ఈవిధమైన అనుభూతి భోజన విరామంలో ఎన్నడైనా కలిగినదా ( మీరు ఏమీ తిననప్పుడు) ?</p> <p>a. ఈవిధమైన అనుభవం భోజనానికి సంబంధించినది అవుతుందా?</p> <p>b. ఈ అనుభూతి ఎంతటి తీవ్రమైనది ?</p> | <p>0. అవును</p> <p>1. లేదు</p> <p>0 కాదు →→→→ ప్రశ్నకు వెళ్ళండి</p> <p>1 భోజనానికి ముందు</p> <p>2 భోజనం చేసేటప్పుడు</p> <p>3 భోజనానంతరం</p> <p>1 చాలా తేలికైన</p> <p>2 తేలికైన</p> <p>3 మితంగా</p> <p>4 ఉధృతంగా</p> <p>5 అధిక ఉధృతం</p> |                             |

# ఎఫ్ బి డి-ఆర్3

తారీఖు: \_\_\_ / \_\_\_ / \_\_\_

గుర్తింపు: \_\_\_\_\_

తేది నెల సంవత్సరము

|                                                                                                                                                                                         |                                                                                                                                                                                                                                 |                              |
|-----------------------------------------------------------------------------------------------------------------------------------------------------------------------------------------|---------------------------------------------------------------------------------------------------------------------------------------------------------------------------------------------------------------------------------|------------------------------|
| <p>4. మీరు తినేటప్పుడు లేక త్రాగేటప్పుడు మ్రింగడంలో బాధ ఏదైనా కలుగుతున్నదా ?</p> <p>a. మీరు తినేటప్పుడు లేక త్రాగేటప్పుడు మ్రింగడంలో మీరేమైనా ఇబ్బంది పడుతున్నట్లు భావిస్తున్నారా ?</p> | <p>0.ఎప్పుడూ లేదు/చాలా తక్కువ</p> <p>1.అప్పుడప్పుడు</p> <p>2.ఎప్పుడైనా</p> <p>3.తరచుగా</p> <p>4.చాలా తరచుగా</p> <p>0.ఎప్పుడూ లేదు/చాలా తక్కువ</p> <p>1.అప్పుడప్పుడు</p> <p>2.ఎప్పుడైనా</p> <p>3.తరచుగా</p> <p>4.చాలా తరచుగా</p> |                              |
| <p>5. గత 3 నెలలుగా మీ ఛాతీ మధ్యభాగంలో తరచుగా నొప్పిగాని అసౌకర్యంగాని కలిగినదా (గుండెకు సంబంధించిన సమస్యలు కాకుండా) ?</p>                                                                | <p>0. ఎప్పుడూ లేదు →→→→</p> <p>1. నెలలో ఒక రోజు కన్నా తక్కువ.</p> <p>2. నెలలో ఒక రోజు.</p> <p>3.నెలలో రెండు లేదా మూడు రోజులు.</p> <p>4.వారంలో ఒక రోజు.</p> <p>5.వారంలో ఒక రోజు కన్నా ఎక్కువ.</p> <p>6.ప్రతీ రోజు</p>            | <p>8వ ప్రశ్నకు వెళ్ళండి</p>  |
| <p>6. ఈ ఛాతీ నొప్పి గత 6 నెలలుగా లేక అంతకు మించి వున్నదా ?</p>                                                                                                                          | <p>0. అవును</p> <p>1. లేదు</p>                                                                                                                                                                                                  |                              |
| <p>7. మీకు ఛాతీ నొప్పి వచ్చినప్పుడు, తరచుగా మండుతున్నట్లుగా అనిపిస్తుండేదా ?</p>                                                                                                        | <p>0.ఎప్పుడూ లేదు/చాలా తక్కువ</p> <p>1.అప్పుడప్పుడు</p> <p>2.ఎప్పుడైనా</p> <p>3.తరచుగా</p> <p>4.చాలా తరచుగా</p>                                                                                                                 |                              |
| <p>8. గత 3 నెలలనుండి, తరచుగా ఎంతగా గుండె మండుతుండేది ( ఛాతీ మండినట్లుగా నొప్పితో కూడిన మంటితో అసౌకర్యంగాని కలిగినదా) ?</p>                                                              | <p>0. ఎప్పుడూ లేదు →→→→</p> <p>1. నెలలో ఒక రోజు కన్నా తక్కువ.</p> <p>2. నెలలో ఒక రోజు.</p> <p>3.నెలలో రెండు లేదా మూడు రోజులు.</p> <p>4.వారంలో ఒక రోజు.</p>                                                                      | <p>10వ ప్రశ్నకు వెళ్ళండి</p> |

# ఎఫ్ బి డి-ఆర్3

తారీఖు: \_\_\_\_ / \_\_\_\_ / \_\_\_\_

గుర్తింపు: \_\_\_\_\_

తేది నెల సంవత్సరము

|                                                                                                                                                                                 |                                                                                                                                                                                          |                       |
|---------------------------------------------------------------------------------------------------------------------------------------------------------------------------------|------------------------------------------------------------------------------------------------------------------------------------------------------------------------------------------|-----------------------|
|                                                                                                                                                                                 | 5.వారం లో ఒక రోజు కన్నా ఎక్కువ.<br>6.ప్రతి రోజు                                                                                                                                          |                       |
| 9. ఈ గుండె మంట ( ఛాతీలో నొప్పితో కూడిన మంట లేక అసౌకర్యం) ఈ 6 నెలలలో లేక అంతకు మించిన కాలంలో కలిగినదా ?                                                                          | 0. అవును<br>1. లేదు                                                                                                                                                                      |                       |
| 10. గత 3 నెలలుగా మీరు ఆహారం భుజిస్తున్నప్పుడు, ఏదైనా త్రాగుతున్నప్పుడు గాని మ్రింగినప్పుడు ఏదైనా అడ్డుపడినట్లుగాను లేక మెల్లిగా ఛాతీ ద్వారా క్రిందికి జారినట్లుగా అనిపించిందా ? | 0. ఎప్పుడూ లేదు →→→→<br>1. నెలలో ఒక రోజు కన్నా తక్కువ.<br>2. నెలలో ఒక రోజు.<br>3. నెలలో రెండు లేదా మూడు రోజులు.<br>4.వారం లో ఒక రోజు.<br>5.వారం లో ఒక రోజు కన్నా ఎక్కువ.<br>6.ప్రతి రోజు | 12వ ప్రశ్నకు వెళ్ళండి |
| 11. గుండెమంటతో పాటుగా ఆహారం అంటుకున్నట్లుగా లక్షణాలున్నాయా ?                                                                                                                    | 0.ఎప్పుడూ లేదు/చాలా తక్కువ<br>1.అప్పుడప్పుడు<br>2.ఎప్పుడైనా<br>3.తరచుగా<br>4.చాలా తరచుగా                                                                                                 |                       |
| 12. గత 3 నెలలుగా, పూర్తిగా నిత్యం తీసుకొనే భోజన పరిమాణం వలన తరచుగా మీకేమైన అసౌకర్యం కలిగిందా?                                                                                   | 0. ఎప్పుడూ లేదు →→→→<br>1. నెలలో ఒక రోజు కన్నా తక్కువ.<br>2. నెలలో ఒక రోజు.<br>3. నెలలో రెండు లేదా మూడు రోజులు.<br>4.వారం లో ఒక రోజు.<br>5.వారం లో ఒక రోజు కన్నా ఎక్కువ.<br>6.ప్రతి రోజు | 14వ ప్రశ్నకు వెళ్ళండి |
| 13. భోజనానంతరం కడుపునిండినట్లుగా, అసౌకర్యంగా కలిగే అనుభూతి మీకు గత 6 నెలలు లేక అంతకు ముందునుండి కలిగినదా ?<br><br>a) ఈ కడుపునిండడం, భోజనానికి సంబంధించిందేనా ?                  | 0. అవును<br>1. లేదు<br><br>0 కాదు<br>1 నిత్య భోజనం<br>2 అధిక భోజనం<br>3 స్వల్ప భోజనం                                                                                                     |                       |

# ఎఫ్ బి డి-ఆర్3

తారీఖు: \_\_\_\_ / \_\_\_\_ / \_\_\_\_

గుర్తింపు: \_\_\_\_\_

తేది నెల సంవత్సరము

|                                                                                                                                                                                                                                                                                                                                                                                                                                                                                                         |                                                                                                                                                                                                                                                                                                                                                                                                                                                                                                                                                                    |                                                                                                                              |
|---------------------------------------------------------------------------------------------------------------------------------------------------------------------------------------------------------------------------------------------------------------------------------------------------------------------------------------------------------------------------------------------------------------------------------------------------------------------------------------------------------|--------------------------------------------------------------------------------------------------------------------------------------------------------------------------------------------------------------------------------------------------------------------------------------------------------------------------------------------------------------------------------------------------------------------------------------------------------------------------------------------------------------------------------------------------------------------|------------------------------------------------------------------------------------------------------------------------------|
| <p>b) సాధారణంగా, ఈ కడుపునిండడం అనేది పొట్టలో ఏ భాగంలో ఉన్నది? (కుడి ప్రక్కనున్న చిత్రంలో చూపించవలసినది)</p> <p>c) కడుపు నిండిన తరువాత మీరెలాంటి ఉపశమనాన్ని పొందుతారు ?</p> <p>d) గత 3 నెలలుగా, మీరెంత తరచుగా కడుపునిండిన లక్షణాల అనుభూతిని పొందినారు ?</p> <p>e) గత 6 నెలలు లేక ఇంకా అధిక సమయం ఈ కడుపు నిండడం అనుభవానికి వచ్చిందా?</p> <p>f) మీ కడుపు నిండడాన్ని, దాని తీవ్రతను మీరెలా తెలియజేస్తారు ?</p> <p>g) కడుపు నిండినప్పుడు, మీరు అత్యవసరంగా విసర్జనశాలకు ( టాయ్ లెట్) వెళ్ళవలసి వస్తుందా ?</p> | <p>1 ఉదరపు పైభాగం<br/>2 దిగువ ఉదరం<br/>3 మీ బొడ్డు చుట్టూ<br/>4 పూర్తిగా ఉదరభాగం<br/>5 ఛాతీ</p> <p>1 మల విసర్జన చేస్తున్నప్పుడు<br/>2 అపాన వాయువు పంపుతున్నప్పుడు<br/>3 రెండూ<br/>4 ఏదీ కాదు<br/>5 త్రేస్సులు</p> <p>0. ఎప్పుడూ లేదు →→→→<br/>1. నెలలో ఒక రోజు కన్నా తక్కువ.<br/>2. నెలలో ఒక రోజు.<br/>3. నెలలో రెండు లేదా మూడు రోజులు.<br/>4. వారంలో ఒక రోజు.<br/>5. వారంలో ఒక రోజు కన్నా ఎక్కువ.<br/>6. ప్రతీ రోజు</p> <p>0. అవును<br/>1. లేదు</p> <p>1 చాలా తేలికైన<br/>2 తేలికైన<br/>3 మితంగా<br/>4 ఉద్యతంగా<br/>5 అధిక ఉద్యతం</p> <p>0. అవును<br/>1. లేదు</p> | <p>13b)</p> 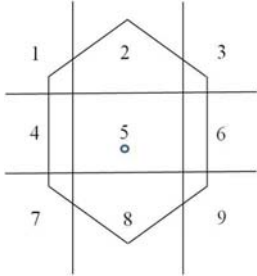 <p>16వ ప్రశ్నకు వెళ్ళండి</p> |
| <p>14. గత 3 నెలలలో, ఎన్నిమార్లు మీరు నిత్యం తీసుకునే భోజనాన్ని పూర్తిచేయలేకపోయారు?</p>                                                                                                                                                                                                                                                                                                                                                                                                                  | <p>0. ఎప్పుడూ లేదు →→→→<br/>1. నెలలో ఒక రోజు కన్నా తక్కువ.<br/>2. నెలలో ఒక రోజు.</p>                                                                                                                                                                                                                                                                                                                                                                                                                                                                               | <p>16వ ప్రశ్నకు వెళ్ళండి</p>                                                                                                 |

# ఎఫ్ బి డి-ఆర్3

తారీఖు: \_\_\_ / \_\_\_ / \_\_\_

గుర్తింపు: \_\_\_\_\_

తేది నెల సంవత్సరము

|                                                                                                                                                                                              |                                                                                                                                                                                                                                                                                         |                                                                                                                  |
|----------------------------------------------------------------------------------------------------------------------------------------------------------------------------------------------|-----------------------------------------------------------------------------------------------------------------------------------------------------------------------------------------------------------------------------------------------------------------------------------------|------------------------------------------------------------------------------------------------------------------|
|                                                                                                                                                                                              | <p>3.నెలలో రెండు లేదా మూడు రోజులు.</p> <p>4.వారంలో ఒక రోజు.</p> <p>5.వారంలో ఒక రోజు కన్నా ఎక్కువ.</p> <p>6.ప్రతీ రోజు</p>                                                                                                                                                               |                                                                                                                  |
| <p>15. గతంలో మీరు నిత్యం తీసుకునే భోజనాన్ని పూర్తిచేయలేకపోయే ఇటువంటి అసమర్థత గత 6 నెలల నుండి లేదా ఆపైన కలదా ?</p>                                                                            | <p>0. అవును</p> <p>1. లేదు</p>                                                                                                                                                                                                                                                          |                                                                                                                  |
| <p>16. గత 3 నెలలలో, మీ చాతీపై కాకుండా పొట్ట పైభాగంలోని బొడ్డుపైన, ఎన్నిమార్లు కడుపు మధ్యలో నొప్పి లేదా మండినట్లుగా వుండేది ? (కుడి ప్రక్కన గల చిత్రంపై గుర్తించండి),</p> <p>a) మీకున్నదా</p> | <p>0. ఎప్పుడూ లేదు →→→→</p> <p>1. నెలలో ఒక రోజు కన్నా తక్కువ.</p> <p>2. నెలలో ఒక రోజు.</p> <p>3.నెలలో రెండు లేదా మూడు రోజులు.</p> <p>4.వారంలో ఒక రోజు.</p> <p>5.వారంలో ఒక రోజు కన్నా ఎక్కువ.</p> <p>6.ప్రతీ రోజు</p> <p>1 కేవలం నొప్పి</p> <p>2 కేవలం మంట</p> <p>3 నొప్పి మరియు మంట</p> | <p>25వ ప్రశ్నకు వెళ్ళండి</p> 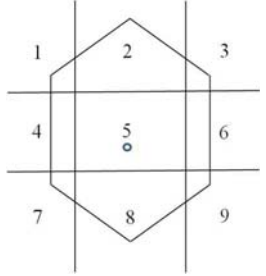 |
| <p>17. ఈ విధమైన నొప్పి లేక మంట గత 6 నెలల నుండి లేదా అంతకు మించి ఉన్నదా?</p>                                                                                                                  | <p>0. అవును</p> <p>1. లేదు</p>                                                                                                                                                                                                                                                          |                                                                                                                  |
| <p>18. ఈ విధమైన నొప్పి లేక మంట వచ్చి మరియు అదేరోజున పూర్తిగా తగ్గిపోతుందా ?</p>                                                                                                              | <p>0.ఎప్పుడూ లేదు/చాలా తక్కువ</p> <p>1.అప్పుడప్పుడు</p> <p>2.ఎప్పుడైనా</p> <p>3.తరచుగా</p> <p>4.చాలా తరచుగా</p>                                                                                                                                                                         |                                                                                                                  |
| <p>19. సాధారణంగా, మీ పొట్ట మధ్యలోని బొడ్డు పైభాగం కడుపులోని మంట లేక నొప్పి ఎలా వుంటుంది ? (కుడి ప్రక్కన గల చిత్రంపై గుర్తించండి),</p>                                                        | <p>1 చాలా తేలికైన</p> <p>2 తేలికైన</p> <p>3 మితంగా</p> <p>4 ఉధృతంగా</p> <p>5 అధిక ఉధృతం</p>                                                                                                                                                                                             |                             |

# ఎఫ్ బి డి-ఆర్3

తారీఖు: \_\_\_\_ / \_\_\_\_ / \_\_\_\_

గుర్తింపు: \_\_\_\_\_

తేది నెల సంవత్సరము

|                                                                                                                                                                                                                                                                                                                                                                                                                                                             |                                                                                                                                                                                                     |  |
|-------------------------------------------------------------------------------------------------------------------------------------------------------------------------------------------------------------------------------------------------------------------------------------------------------------------------------------------------------------------------------------------------------------------------------------------------------------|-----------------------------------------------------------------------------------------------------------------------------------------------------------------------------------------------------|--|
| <p>20. ఈ మంట లేక నోప్పి మీరు ఆహారం తీసుకున్న తరువాత ఏరకంగా ఉంటుంది ?</p>                                                                                                                                                                                                                                                                                                                                                                                    | <p>1.తిండ0 వల్ల ప్రభావమ్ ఏమి లేదు<br/>2.తిన్న తర్వాత నోప్పి పెరుగుతుంది<br/>3.తిన్న తర్వాత నోప్పి తగ్గుతుంది</p>                                                                                    |  |
| <p>21. ఈ మంట లేక నోప్పి, ఏటాసీడ్స్ సేవించడం వలన ఉపశాంతి పొందుతున్నారా ?</p>                                                                                                                                                                                                                                                                                                                                                                                 | <p>0.ఎప్పుడూ లేదు/చాలా తక్కువ<br/>1.అప్పుడప్పుడు<br/>2.ఎప్పుడైనా<br/>3.తరచుగా<br/>4.చాలా తరచుగా</p>                                                                                                 |  |
| <p>22. పేగులు కదిలినప్పుడు (విరేచనం అయినప్పుడు) లేదా అపాన వాయువు విసర్జించిన తరువాత, . ఈ మంట లేక నోప్పి, సాధారణంగా తగ్గుదల లేక పూర్తిగా నయమవడం జరుగుతుందా ?</p> <p>a) పేగులు కదిలినప్పుడు (విరేచనం అయినప్పుడు) లేదా అపాన వాయువు విసర్జించిన తరువాత, . ఈ మంట లేక నోప్పి, సాధారణంగా తగ్గుదల లేక పూర్తిగా నయమవడం జరుగుతుందా ?</p> <p>b) పేగులు కదిలినప్పుడు (విరేచనం అయినప్పుడు) లేదా అపాన వాయువు విసర్జించిన తరువాత, . ఈ మంట లేక నోప్పి, ఇంకా పెరిగిందా ?</p> | <p>0.ఎప్పుడూ లేదు/చాలా తక్కువ<br/>1.అప్పుడప్పుడు<br/>2.ఎప్పుడైనా<br/>3.తరచుగా<br/>4.చాలా తరచుగా</p> <p>0. లేదు<br/>1 మల విసర్జన<br/>2 అపాన వాయు విసర్జన<br/>3 రెండూ</p> <p>0. అవును<br/>1. లేదు</p> |  |
| <p>23. ఈ మంట లేక నోప్పి ప్రారంభమైనప్పుడు, సాధారణంగా మీకు అయ్యే విరోచనాల సంఖ్యలో మార్పు కనిపిస్తుందా ( ఎక్కువవడం గాని లేక తక్కువవడంగాని) ?</p>                                                                                                                                                                                                                                                                                                               | <p>0.ఎప్పుడూ లేదు/చాలా తక్కువ<br/>1.అప్పుడప్పుడు<br/>2.ఎప్పుడైనా<br/>3.తరచుగా<br/>4.చాలా తరచుగా</p>                                                                                                 |  |

# ఎఫ్ బి డి-ఆర్3

తారీఖు: \_\_\_/\_\_\_/\_\_\_

గుర్తింపు: \_\_\_\_\_

తేది నెల సంవత్సరము

|                                                                                                                     |                                                                                                                                                                                                    |                              |
|---------------------------------------------------------------------------------------------------------------------|----------------------------------------------------------------------------------------------------------------------------------------------------------------------------------------------------|------------------------------|
| <p>24. ఈ మంట లేక నొప్పి ప్రారంభమైనప్పుడు, మీరు విస్తరించే మలం, సాధారణంగా పల్చగా వుంటుందా లేక గట్టిగా వుంటుందా ?</p> | <p>0.ఎప్పుడూ లేదు/చాలా తక్కువ<br/>1.అప్పుడప్పుడు<br/>2.ఎప్పుడైనా<br/>3.తరచుగా<br/>4.చాలా తరచుగా</p>                                                                                                |                              |
| <p>25. గత 3 నెలలలో, ఎన్నిమార్లు వాంతులు మిమ్మల్ని బాధించాయి ?</p>                                                   | <p>0. ఎప్పుడూ లేదు →→→→<br/>1. నెలలో ఒక రోజు కన్నా తక్కువ.<br/>2. నెలలో ఒక రోజు.<br/>3.నెలలో రెండు లేదా మూడు రోజులు.<br/>4.వారంలో ఒక రోజు.<br/>5.వారంలో ఒక రోజు కన్నా ఎక్కువ.<br/>6.ప్రతీ రోజు</p> | <p>27వ ప్రశ్నకు వెళ్ళండి</p> |
| <p>26. 6 నెలల క్రితమే ఈ వాంతులు ప్రారంభమయ్యాయా ?</p>                                                                | <p>0. అవును<br/>1. లేదు</p>                                                                                                                                                                        |                              |
| <p>27. గత 3 నెలల కాలంలో, ఎన్నిమార్లు వాంతి చేసుకున్నారు ?</p>                                                       | <p>0. ఎప్పుడూ లేదు →→→→<br/>1. నెలలో ఒక రోజు కన్నా తక్కువ.<br/>2. నెలలో ఒక రోజు.<br/>3.నెలలో రెండు లేదా మూడు రోజులు.<br/>4.వారంలో ఒక రోజు.<br/>5.వారంలో ఒక రోజు కన్నా ఎక్కువ.<br/>6.ప్రతీ రోజు</p> | <p>32వ ప్రశ్నకు వెళ్ళండి</p> |
| <p>28. ఈ వాంతులు గత 6 నెలల నుండి లేక ఆ పైబడి ఉన్నాయా ?</p>                                                          | <p>0. అవును<br/>1. లేదు</p>                                                                                                                                                                        |                              |
| <p>29. మీ అంతట మీరే వాంతిచేసుకుంటారా ?</p>                                                                          | <p>0.ఎప్పుడూ లేదు/చాలా తక్కువ<br/>1.అప్పుడప్పుడు<br/>2.ఎప్పుడైనా<br/>3.తరచుగా<br/>4.చాలా తరచుగా</p>                                                                                                |                              |
| <p>30. గత సంవత్సరం మీకు వాంతులయ్యాయా, అవి కొన్నిరోజులు విడివిగా సంభవించిన తరువాత</p>                                | <p>0.ఎప్పుడూ లేదు/చాలా తక్కువ →→→→<br/>1.అప్పుడప్పుడు</p>                                                                                                                                          | <p>32వ ప్రశ్నకు వెళ్ళండి</p> |



# ఎఫ్ బి డి-ఆర్3

తారీఖు: \_\_\_\_ / \_\_\_\_ / \_\_\_\_

గుర్తింపు: \_\_\_\_\_

తేది నెల సంవత్సరము

|                                                                                                                                     |                                                                                                                                                                                                   |                              |
|-------------------------------------------------------------------------------------------------------------------------------------|---------------------------------------------------------------------------------------------------------------------------------------------------------------------------------------------------|------------------------------|
| <p>ఆగిపోయాయా?</p>                                                                                                                   | <p>2.ఎప్పడైనా<br/>3.తరచుగా<br/>4.చాలా తరచుగా</p>                                                                                                                                                  |                              |
| <p>31. గత సంవత్సరంలో మీకు ఇటువంటి సంఘటనలు కనీసం మూడు జరిగినాయా?</p>                                                                 | <p>0. అవును<br/>1. లేదు</p>                                                                                                                                                                       |                              |
| <p>32 గతమూడు నెలలలో, ఎన్నిమార్లు తిన్న ఆహారం మీ నోటికి తిరిగి వచ్చింది ?</p>                                                        | <p>0. ఎప్పడూ లేదు →→→→<br/>1. నెలలో ఒక రోజు కన్నా తక్కువ.<br/>2. నెలలో ఒక రోజు.<br/>3.నెలలో రెండు లేదా మూడు రోజులు.<br/>4.వారంలో ఒక రోజు.<br/>5.వారంలో ఒక రోజు కన్నా ఎక్కువ.<br/>6.ప్రతీ రోజు</p> | <p>38వ ప్రశ్నకు వెళ్ళండి</p> |
| <p>33. మీకీ సమస్య ( తిన్న ఆహారం నోటికి తిరిగి రావడం ) గత 6 నెలలు లేక అంతకు మించి కలదా?</p>                                          | <p>0. అవును<br/>1. లేదు</p>                                                                                                                                                                       |                              |
| <p>34. తిన్న ఆహారం నోటికి తిరిగి వచ్చినప్పుడు, మీరు తిరిగి మ్రింగక లేక ఉసివేయక ముందు సాధారణంగా కొంతసేపయినా నోటిలో ఉండిపోతుందా ?</p> | <p>0.ఎప్పడూ లేదు/చాలా తక్కువ<br/>1.అప్పుడప్పుడు<br/>2.ఎప్పడైనా<br/>3.తరచుగా<br/>4.చాలా తరచుగా</p>                                                                                                 |                              |
| <p>35. ఆహారం నోటికి తిరిగి వచ్చేముందు కడుపులో తిప్పతున్నదా (ఓకరిస్తుందా) ?</p>                                                      | <p>0.ఎప్పడూ లేదు/చాలా తక్కువ<br/>1.అప్పుడప్పుడు<br/>2.ఎప్పడైనా<br/>3.తరచుగా<br/>4.చాలా తరచుగా</p>                                                                                                 |                              |
| <p>36. ఆహారం నోటికి తిరిగి వచ్చిన తరువాత, తరచుగా మీరెన్నిమార్లు వాంతిచేసుకున్నారు లేక కడుపులో అస్వస్థతగా భావించారు</p>              | <p>0.ఎప్పడూ లేదు/చాలా తక్కువ<br/>1.అప్పుడప్పుడు<br/>2.ఎప్పడైనా<br/>3.తరచుగా<br/>4.చాలా తరచుగా</p>                                                                                                 |                              |

# ఎఫ్ బి డి-ఆర్3

తారీఖు: \_\_\_\_ / \_\_\_\_ / \_\_\_\_

గుర్తింపు: \_\_\_\_\_

తేది నెల సంవత్సరము

|                                                                                                                                                                                                                                                                                   |                                                                                                                                                                                                                                                                                                          |                              |
|-----------------------------------------------------------------------------------------------------------------------------------------------------------------------------------------------------------------------------------------------------------------------------------|----------------------------------------------------------------------------------------------------------------------------------------------------------------------------------------------------------------------------------------------------------------------------------------------------------|------------------------------|
| <p>37. కడుపులోని ఆహారం పులిసిన (పుల్లగా) తరువాత నోటిలోనికి తిరిగి రావడం ఆగిపోయిందా ?</p>                                                                                                                                                                                          | <p>0. ఎప్పుడూ లేదు/చాలా తక్కువ<br/>1. అప్పుడప్పుడు<br/>2. ఎప్పుడైనా<br/>3. తరచుగా<br/>4. చాలా తరచుగా</p>                                                                                                                                                                                                 |                              |
| <p>38 గత 3 నెలలుగా, మీకెన్నిమార్లు తేన్సులతో కూడిన బాధను అనుభవించారు.</p>                                                                                                                                                                                                         | <p>0. ఎప్పుడూ లేదు →→→→<br/>1. నెలలో ఒక రోజు కన్నా తక్కువ.<br/>2. నెలలో ఒక రోజు.<br/>3. నెలలో రెండు లేదా మూడు రోజులు.<br/>4. వారంలో ఒక రోజు.<br/>5. వారంలో ఒక రోజు కన్నా ఎక్కువ.<br/>6. ప్రతీ రోజు</p>                                                                                                   | <p>40వ ప్రశ్నకు వెళ్ళండి</p> |
| <p>39. అనుభవించిన ఈ తేన్సుల బాధ మీకు గత 6 నెలల నుండి ప్రారంభమైనదా ?</p> <p>a) ఆహారంతో పాటు తేన్సులకు గల అవినాభావసంబంధం ఏమిటి ?</p> <p>b) సర్వసాధారణంగా తేన్సులు ఎంతటి తీవ్రతరమైనవి</p> <p>c) ఈ తేన్సులు ముందు ముందు మెరుగవుతాయా ?</p> <p>d) ఈ తేన్సులు ఒకే సమయంలో వస్తుంటాయా?</p> | <p>0. అవును<br/>1. లేదు</p> <p>0 ఏదీకాదు<br/>1 భోజనానికి ముందు<br/>2 భోజనం చేసేటప్పుడు<br/>3 భోజనానంతరం</p> <p>1 చాలా తేలికైన<br/>2 తేలికైన<br/>3 మితంగా<br/>4 ఉధృతంగా<br/>5 అధిక ఉధృతం</p> <p>1 మల విసర్జన<br/>2 అపాన వాయు విసర్జన<br/>3 తినడం</p> <p>1 పేగులలో జరగ వాయువు చేరడం<br/>2 కడుపు నొప్పి</p> |                              |

# ఎఫ్ బి డి-ఆర్3

తారీఖు: \_\_\_ / \_\_\_ / \_\_\_

గుర్తింపు: \_\_\_\_\_

తేది నెల సంవత్సరము

|                                                                                                                                                 |                                                                                                                                                                                                           |                                                                                                                  |
|-------------------------------------------------------------------------------------------------------------------------------------------------|-----------------------------------------------------------------------------------------------------------------------------------------------------------------------------------------------------------|------------------------------------------------------------------------------------------------------------------|
| <p>e) దీనితో మీకు వచ్చే తేన్పులకు ఉపశమనం కలుగుతుందా?</p>                                                                                        | <p>3 గుండె మంట<br/>4 ఆహారం నోటిలోని రావడం<br/>5 నోటిలోనికి ద్రవ పదార్థాలు రావడం</p> <p>1 భోజనం<br/>2 పిపిఐ<br/>3 అపాన వాయు విసర్జన<br/>4 మలవిసర్జన తరువాత<br/>5 ప్రత్యామ్నాలు<br/>6 ఏవీ కావు</p>          |                                                                                                                  |
| <p>40. గత 3 నెలల నుండి, తరుచుగా మీకెన్నిమార్లు పొత్తి కడుపులో అసాకర్యం కలిగింది లేదా నొప్పి కలిగింది ? (కుడిప్రక్కన ఇచ్చిన పటంలో చూపించండి)</p> | <p>0. ఎప్పుడూ లేదు →→→→</p> <p>1. నెలలో ఒక రోజు కన్నా తక్కువ.<br/>2. నెలలో ఒక రోజు.<br/>3. నెలలో రెండు లేదా మూడు రోజులు.<br/>4. వారంలో ఒక రోజు.<br/>5. వారంలో ఒక రోజు కన్నా ఎక్కువ.<br/>6. ప్రతీ రోజు</p> | <p>51వ ప్రశ్నకు వెళ్ళండి</p> 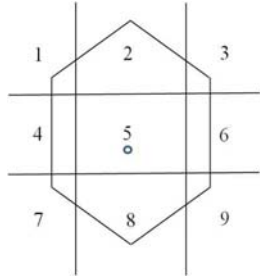 |
| <p>41. మీకు కేవలం నొప్పి మాత్రమే కలదా ( అసాకర్యం మాత్రమే కాదు, అసాకర్యం మరియు నొప్పితో కూడినది) ?</p> <p>a) మీకున్నదా</p>                       | <p>0. ఎప్పుడూ లేదు/చాలా తక్కువ<br/>1. అప్పుడప్పుడు<br/>2. ఎప్పుడైనా<br/>3. తరచుగా<br/>4. చాలా తరచుగా</p> <p>1 కేవలం నొప్పి మాత్రమే<br/>2 అసాకర్యం మాత్రమే<br/>3 నొప్పి మరియు అసాకర్యం</p>                 |                                                                                                                  |
| <p>42. స్త్రీల కొరకు : ఈ అసాకర్యం మరియు నొప్పి కేవలం ఋతుస్రావం (బహిష్టు) సమయంలోనే వస్తుందా, మరే ఇతర సమయాలలో రాదా ?</p>                          | <p>0. అవును<br/>1. లేదు</p>                                                                                                                                                                               |                                                                                                                  |

# ఎఫ్ బి డి-ఆర్3

తారీఖు: \_\_\_\_ / \_\_\_\_ / \_\_\_\_

గుర్తింపు: \_\_\_\_\_

తేది నెల సంవత్సరము

|                                                                                                                                                                                        |                                                                                                                                                                                                           |  |
|----------------------------------------------------------------------------------------------------------------------------------------------------------------------------------------|-----------------------------------------------------------------------------------------------------------------------------------------------------------------------------------------------------------|--|
| <p>43. మీకు ఈ నొప్పికలిగినప్పుడు, మీ నిత్యజీవితంలోని విధుల నిర్వహణలో ఆటంకం లేదా పరిమితులు ఏర్పడ్డాయా (ఉదా : పని, ఇంటి పనులు, మరియు సామాజిక పరమైన సంఘటనలు) ?</p>                        | <p>0.ఎప్పుడూ లేదు/చాలా తక్కువ<br/>1.అప్పుడప్పుడు<br/>2.ఎప్పుడైనా<br/>3.తరచుగా<br/>4.చాలా తరచుగా</p>                                                                                                       |  |
| <p>44. మీకు కలిగిన ఈ అసౌకర్యం లేదా నొప్పి 6 నెలలు లేదా ఇంకా ఎక్కువ సమయంనుండి కలదా?</p>                                                                                                 | <p>0. అవును<br/>1. లేదు</p>                                                                                                                                                                               |  |
| <p>45. విరోచనాల తరువాత ఎంతవరకు ఈ అసౌకర్యం లేదా నొప్పి మెరుగుపడడం లేదా తగ్గి (ఆగి) పోవడం జరిగింది.?<br/><br/>a) విరోచనాలనంతరం మీకెంతవరకు ఈ అసౌకర్యం లేదా నొప్పి మరింతగా పెరిగిందా ?</p> | <p>0.ఎప్పుడూ లేదు/చాలా తక్కువ<br/>1.అప్పుడప్పుడు<br/>2.ఎప్పుడైనా<br/>3.తరచుగా<br/>4.చాలా తరచుగా<br/><br/>0.ఎప్పుడూ లేదు/చాలా తక్కువ<br/>1.అప్పుడప్పుడు<br/>2.ఎప్పుడైనా<br/>3.తరచుగా<br/>4.చాలా తరచుగా</p> |  |
| <p>46. ఈ అసౌకర్యం లేదా నొప్పి ప్రారంభమైనప్పుడు, మీకు తరచుగాను, మరింతగా విరోచనాలు కలిగాయాయా ?</p>                                                                                       | <p>0.ఎప్పుడూ లేదు/చాలా తక్కువ<br/>1.అప్పుడప్పుడు<br/>2.ఎప్పుడైనా<br/>3.తరచుగా<br/>4.చాలా తరచుగా</p>                                                                                                       |  |
| <p>47. ఈ అసౌకర్యం లేదా నొప్పి ప్రారంభమైనప్పుడు, మీకు తరచుగా తక్కువగా విరోచనాలు కలిగాయాయా ?</p>                                                                                         | <p>0.ఎప్పుడూ లేదు/చాలా తక్కువ<br/>1.అప్పుడప్పుడు<br/>2.ఎప్పుడైనా<br/>3.తరచుగా<br/>4.చాలా తరచుగా</p>                                                                                                       |  |
| <p>48. ఈ అసౌకర్యం లేదా నొప్పి ప్రారంభమైనప్పుడు, మీ మలవిసర్జన (విరోచనాలు) నీళ్లలాగ పలుచగా</p>                                                                                           | <p>0.ఎప్పుడూ లేదు/చాలా తక్కువ<br/>1.అప్పుడప్పుడు</p>                                                                                                                                                      |  |

# ఎఫ్ బి డి-ఆర్3

తారీఖు: \_\_\_ / \_\_\_ / \_\_\_

గుర్తింపు: \_\_\_\_\_

తేది నెల సంవత్సరము

|                                                                                                                     |                                                                                                   |  |
|---------------------------------------------------------------------------------------------------------------------|---------------------------------------------------------------------------------------------------|--|
| <p>వస్తుంటాయా ?</p>                                                                                                 | <p>2.ఎప్పడైనా<br/>3.తరచుగా<br/>4.చాలా తరచుగా</p>                                                  |  |
| <p>49. ఈ అసాకర్యం లేదా నొప్పి ప్రారంభమైనప్పుడు, మీ మలవిసర్జన ఎంతవరకు గట్టిగా వున్నది ?</p>                          | <p>0.ఎప్పడూ లేదు/చాలా తక్కువ<br/>1.అప్పుడప్పుడు<br/>2.ఎప్పడైనా<br/>3.తరచుగా<br/>4.చాలా తరచుగా</p> |  |
| <p>50. ఎంతవరకు ఈ అసాకర్యాన్ని లేదా నొప్పిని కదలడం వలనను లేక స్థానాన్ని మార్చడం వలనను ఉపశమనాన్ని పొందుతున్నారు ?</p> | <p>0.ఎప్పడూ లేదు/చాలా తక్కువ<br/>1.అప్పుడప్పుడు<br/>2.ఎప్పడైనా<br/>3.తరచుగా<br/>4.చాలా తరచుగా</p> |  |
| <p>51. (0-2) a week? గత 3 నెలలలో ఒక వారానికి మూడుకు మించి విరోచనాలను మీరెంతవరకు కలిగియున్నారు (0-2) ?</p>           | <p>0.ఎప్పడూ లేదు/చాలా తక్కువ<br/>1.అప్పుడప్పుడు<br/>2.ఎప్పడైనా<br/>3.తరచుగా<br/>4.చాలా తరచుగా</p> |  |
| <p>52. గత 3 నెలల కాలంలో, గట్టిగాను లేక ఒక్కసారిగా మలాన్ని ఎంతవరకు విసర్జించి యున్నారు ?</p>                         | <p>0.ఎప్పడూ లేదు/చాలా తక్కువ<br/>1.అప్పుడప్పుడు<br/>2.ఎప్పడైనా<br/>3.తరచుగా<br/>4.చాలా తరచుగా</p> |  |
| <p>53. గత 3 నెలల కాలంలో, మలవిసర్జన చేసేటప్పుడు మీరెంతగా ప్రయాస పడినారు ?</p>                                        | <p>0.ఎప్పడూ లేదు/చాలా తక్కువ<br/>1.అప్పుడప్పుడు<br/>2.ఎప్పడైనా<br/>3.తరచుగా<br/>4.చాలా తరచుగా</p> |  |
| <p>54. గత 3 నెలల కాలంలో, మలవిసర్జన తరువాత పూర్తిగా ఖాళీ చేయలేదన్న భావన మీకు కలిగిందా ?</p>                          | <p>0.ఎప్పడూ లేదు/చాలా తక్కువ<br/>1.అప్పుడప్పుడు<br/>2.ఎప్పడైనా<br/>3.తరచుగా</p>                   |  |

# ఎఫ్ బి డి-ఆర్3

తారీఖు: \_\_\_\_ / \_\_\_\_ / \_\_\_\_

గుర్తింపు: \_\_\_\_\_

తేది నెల సంవత్సరము

|                                                                                                                                                                                                                                                                                                                                  |                                                                                                                                                                                                                                                                                                                |  |
|----------------------------------------------------------------------------------------------------------------------------------------------------------------------------------------------------------------------------------------------------------------------------------------------------------------------------------|----------------------------------------------------------------------------------------------------------------------------------------------------------------------------------------------------------------------------------------------------------------------------------------------------------------|--|
|                                                                                                                                                                                                                                                                                                                                  | 4.చాలా తరచుగా                                                                                                                                                                                                                                                                                                  |  |
| <p>55. గత 3 నెలలకాలంలో, మలం విసర్జించబడలేదని, (నిరోధించబడిందని), అనుభూతి కలిగినదా ?</p> <p>a) మలం విసర్జించడంలో మీరు ఏకారణం వలన కష్టపడుతున్నారు ?</p> <p>b) మలం విసర్జించడంలో మీరు కష్టపడే కారణం</p>                                                                                                                             | <p>0.ఎప్పడూ లేదు/చాలా తక్కువ</p> <p>1.అప్పుడప్పుడు</p> <p>2.ఎప్పుడైనా</p> <p>3.తరచుగా</p> <p>4.చాలా తరచుగా</p> <p>1 చాలా పెద్దది</p> <p>2 చాలా పలుచన</p> <p>3 చాలా గట్టి</p> <p>4 ఎక్కువగా ఆరినది</p> <p>5 పైనవేమీ కావు</p> <p>1 ప్రేరణ లేదు</p> <p>2 బలహీనమైన నెట్టు</p> <p>3 సమర్థవంతంగా నెట్టినా ఆగింది</p> |  |
| <p>56. గత 3 నెలలలుగా, మీరెంతవరకు, మీలో నిండిన మలాన్ని బైటికి రప్పించడానికి తరచుగా క్రింది భాగాన్ని లేక చుట్టూతా నొక్కినారా ?</p> <p>a) గత 3 నెలలలుగా, మీ మలాన్ని విసర్జించడానికి మీరీ క్రింద తెలిపినవాటిని ఆచరించారా</p> <p>i) మీ వ్రేళ్ళను జోనుపుతూ</p> <p>ii) నీటిని చిమ్ముతూ</p> <p>iii) మలద్వారంలో దూర్చే ఒక శంఖాకార ఔషధ</p> | <p>0.ఎప్పడూ లేదు/చాలా తక్కువ</p> <p>1.అప్పుడప్పుడు</p> <p>2.ఎప్పుడైనా</p> <p>3.తరచుగా</p> <p>4.చాలా తరచుగా</p> <p>i) 0. అవును</p> <p>1. లేదు</p> <p>ii) 0. అవును</p> <p>1. లేదు</p> <p>iii) 0. అవును</p>                                                                                                       |  |

# ఎఫ్ బి డి-ఆర్3

తారీఖు: \_\_\_\_ / \_\_\_\_ / \_\_\_\_

గుర్తింపు: \_\_\_\_\_

తేది నెల సంవత్సరము

|                                                                                                                                           |                                                                                                                     |                              |
|-------------------------------------------------------------------------------------------------------------------------------------------|---------------------------------------------------------------------------------------------------------------------|------------------------------|
| <p>పదార్థం</p> <p>iv) మలాశాయంలో సబ్బునీళ్ళ విరేచనకారి ఎనిమాని జొనపడం</p>                                                                  | <p>1. లేదు</p> <p>iv) 0. అవును</p> <p>1. లేదు</p>                                                                   |                              |
| <p>57. గత 3 నెలల కాలంలో, మీరెంత వరకు మల విసర్జన సమయములో మలద్వార కండరాలను నియంత్రించలేకపోవడం వలన మలాన్ని విసర్జించడంలో కష్టం కలుతుందా?</p> | <p>0.ఎప్పడూ లేదు/చాలా తక్కువ</p> <p>1.అప్పుడప్పుడు</p> <p>2.ఎప్పుడైనా</p> <p>3.తరచుగా</p> <p>4.చాలా తరచుగా</p>      |                              |
| <p>58. లిస్టులో పైన తెలిపిన ప్రశ్నలు 51 నుండి 57 వరకు గలవాటిలో మలబద్ధక లక్షణాలు నెలలకు పైబడి కలవా ?</p>                                   | <p>0. అవును</p> <p>1. లేదు</p>                                                                                      |                              |
| <p>59. గత 3 నెలల కాలంలో, రోజుకు 4 లేక అంతకు మించి మలవిసర్జన మీరెంత వరకు చేసియున్నారు ?</p>                                                | <p>0.ఎప్పడూ లేదు/చాలా తక్కువ</p> <p>1.అప్పుడప్పుడు</p> <p>2.ఎప్పుడైనా</p> <p>3.తరచుగా</p> <p>4.చాలా తరచుగా</p>      |                              |
| <p>60. గత 3 నెలల కాలంలో, మీ కెన్ని పలుచని విరేచనాలు, జారుడు లేక నీళ్ళవిరేచనాలు కలిగినాయి ?</p>                                            | <p>0.ఎప్పడూ లేదు/చాలా తక్కువ →→→→</p> <p>1.అప్పుడప్పుడు</p> <p>2.ఎప్పుడైనా</p> <p>3.తరచుగా</p> <p>4.చాలా తరచుగా</p> | <p>62వ ప్రశ్నకు వెళ్ళండి</p> |

తారీఖు: \_\_\_/\_\_\_/\_\_\_

గుర్తింపు: \_\_\_\_\_

తేది నెల సంవత్సరము

|                                                                                                                                                                                                                                                                                                                                                                                                                                                                                                                                             |                                                                                                                                                                                                                                                                                                           |                                                                                                                                                                                                                                                                                                                                                                                                                                                                                                                                                                                                                                                                                                                                                                                                                                                                                                                                                                                                                                                                                                                                                                                                                                                                                                                                  |                                                                                     |                                              |   |                                                                                     |                          |   |                                                                                     |                                             |   |                                                                                     |                                      |   |                                                                                     |                                                 |   |                                                                                     |                                                |   |                                                                                     |                         |   |
|---------------------------------------------------------------------------------------------------------------------------------------------------------------------------------------------------------------------------------------------------------------------------------------------------------------------------------------------------------------------------------------------------------------------------------------------------------------------------------------------------------------------------------------------|-----------------------------------------------------------------------------------------------------------------------------------------------------------------------------------------------------------------------------------------------------------------------------------------------------------|----------------------------------------------------------------------------------------------------------------------------------------------------------------------------------------------------------------------------------------------------------------------------------------------------------------------------------------------------------------------------------------------------------------------------------------------------------------------------------------------------------------------------------------------------------------------------------------------------------------------------------------------------------------------------------------------------------------------------------------------------------------------------------------------------------------------------------------------------------------------------------------------------------------------------------------------------------------------------------------------------------------------------------------------------------------------------------------------------------------------------------------------------------------------------------------------------------------------------------------------------------------------------------------------------------------------------------|-------------------------------------------------------------------------------------|----------------------------------------------|---|-------------------------------------------------------------------------------------|--------------------------|---|-------------------------------------------------------------------------------------|---------------------------------------------|---|-------------------------------------------------------------------------------------|--------------------------------------|---|-------------------------------------------------------------------------------------|-------------------------------------------------|---|-------------------------------------------------------------------------------------|------------------------------------------------|---|-------------------------------------------------------------------------------------|-------------------------|---|
| <p>61. గత 3 నెలల కాలంలో, మీకు జరిగిన మలవిసర్జనలో కనీసం మూడో వంతు (3/4) వదులు విరేచనాలు, జారుడు లేక నీళ్ళవిరేచనాలు కలిగినాయా ?</p> <p>a) మీ మలవిసర్జన విషయంలో మీభావనలు ఏమి ?</p> <p>b) వారానికి తరచుగా జరిగే మీ సరాసరి మలం ?</p> <p>*c) సాధారణంగా మీరు విసర్జించే మలం రకం</p> <p>i) మీరు బాగున్నప్పుడు</p> <p>ii) మీకు మలబద్ధకం కలిగినప్పుడు</p> <p>iii) మీకు విరేచనాలైనప్పుడు</p> <p>iv) చాలా సమయాలలో</p> <p>v) అనారోగ్య స్థితిలో</p> <p>* నిర్దేశించిన బ్రిస్టల్ స్టూల్ స్కేల్ ఫారమ్ లో ఇచ్చిన ఖాళీ స్థలంలో సరియైన నంబరును నింపవలసినది</p> | <p>0. అవును</p> <p>1. లేదు</p> <p>2.</p> <p>1 మలబద్ధకం</p> <p>2 అతిసారం (విరేచనాలు)</p> <p>3 కొన్నిసార్లు మలబద్ధకం, కొన్ని సార్లు అతిసారం (విరేచనాలు)</p> <p>4 పైవి ఏవీ కావు</p> <p>_____ no./week</p> <p>BSS no.</p> <p>i) _____</p> <p>ii) _____</p> <p>iii) _____</p> <p>iv) _____</p> <p>v) _____</p> | <p>బ్రిస్టల్ స్టూల్ స్కేల్ ఫారమ్ (బిఎస్ఎస్)</p> <p>(Bristol Stool Scale Form (BSS))</p> <table border="1"> <tr> <td></td> <td>Separate hard lumps, like nuts, hard to pass</td> <td>1</td> </tr> <tr> <td></td> <td>Sausage-shaped but lumpy</td> <td>2</td> </tr> <tr> <td></td> <td>Like sausage but with cracks on its surface</td> <td>3</td> </tr> <tr> <td></td> <td>Like sausage or snake, smooth &amp; soft</td> <td>4</td> </tr> <tr> <td></td> <td>Soft blobs with clear cut edges (passed easily)</td> <td>5</td> </tr> <tr> <td></td> <td>Fluffy pieces with ragged edges, a mushy stool</td> <td>6</td> </tr> <tr> <td></td> <td>Watery, no solid pieces</td> <td>7</td> </tr> </table> <p>ENTIRELY LIQUID</p> |  | Separate hard lumps, like nuts, hard to pass | 1 |  | Sausage-shaped but lumpy | 2 |  | Like sausage but with cracks on its surface | 3 |  | Like sausage or snake, smooth & soft | 4 |  | Soft blobs with clear cut edges (passed easily) | 5 |  | Fluffy pieces with ragged edges, a mushy stool | 6 |  | Watery, no solid pieces | 7 |
|                                                                                                                                                                                                                                                                                                                                                                                                                                                          | Separate hard lumps, like nuts, hard to pass                                                                                                                                                                                                                                                              | 1                                                                                                                                                                                                                                                                                                                                                                                                                                                                                                                                                                                                                                                                                                                                                                                                                                                                                                                                                                                                                                                                                                                                                                                                                                                                                                                                |                                                                                     |                                              |   |                                                                                     |                          |   |                                                                                     |                                             |   |                                                                                     |                                      |   |                                                                                     |                                                 |   |                                                                                     |                                                |   |                                                                                     |                         |   |
|                                                                                                                                                                                                                                                                                                                                                                                                                                                          | Sausage-shaped but lumpy                                                                                                                                                                                                                                                                                  | 2                                                                                                                                                                                                                                                                                                                                                                                                                                                                                                                                                                                                                                                                                                                                                                                                                                                                                                                                                                                                                                                                                                                                                                                                                                                                                                                                |                                                                                     |                                              |   |                                                                                     |                          |   |                                                                                     |                                             |   |                                                                                     |                                      |   |                                                                                     |                                                 |   |                                                                                     |                                                |   |                                                                                     |                         |   |
|                                                                                                                                                                                                                                                                                                                                                                                                                                                          | Like sausage but with cracks on its surface                                                                                                                                                                                                                                                               | 3                                                                                                                                                                                                                                                                                                                                                                                                                                                                                                                                                                                                                                                                                                                                                                                                                                                                                                                                                                                                                                                                                                                                                                                                                                                                                                                                |                                                                                     |                                              |   |                                                                                     |                          |   |                                                                                     |                                             |   |                                                                                     |                                      |   |                                                                                     |                                                 |   |                                                                                     |                                                |   |                                                                                     |                         |   |
|                                                                                                                                                                                                                                                                                                                                                                                                                                                          | Like sausage or snake, smooth & soft                                                                                                                                                                                                                                                                      | 4                                                                                                                                                                                                                                                                                                                                                                                                                                                                                                                                                                                                                                                                                                                                                                                                                                                                                                                                                                                                                                                                                                                                                                                                                                                                                                                                |                                                                                     |                                              |   |                                                                                     |                          |   |                                                                                     |                                             |   |                                                                                     |                                      |   |                                                                                     |                                                 |   |                                                                                     |                                                |   |                                                                                     |                         |   |
|                                                                                                                                                                                                                                                                                                                                                                                                                                                          | Soft blobs with clear cut edges (passed easily)                                                                                                                                                                                                                                                           | 5                                                                                                                                                                                                                                                                                                                                                                                                                                                                                                                                                                                                                                                                                                                                                                                                                                                                                                                                                                                                                                                                                                                                                                                                                                                                                                                                |                                                                                     |                                              |   |                                                                                     |                          |   |                                                                                     |                                             |   |                                                                                     |                                      |   |                                                                                     |                                                 |   |                                                                                     |                                                |   |                                                                                     |                         |   |
|                                                                                                                                                                                                                                                                                                                                                                                                                                                          | Fluffy pieces with ragged edges, a mushy stool                                                                                                                                                                                                                                                            | 6                                                                                                                                                                                                                                                                                                                                                                                                                                                                                                                                                                                                                                                                                                                                                                                                                                                                                                                                                                                                                                                                                                                                                                                                                                                                                                                                |                                                                                     |                                              |   |                                                                                     |                          |   |                                                                                     |                                             |   |                                                                                     |                                      |   |                                                                                     |                                                 |   |                                                                                     |                                                |   |                                                                                     |                         |   |
|                                                                                                                                                                                                                                                                                                                                                                                                                                                          | Watery, no solid pieces                                                                                                                                                                                                                                                                                   | 7                                                                                                                                                                                                                                                                                                                                                                                                                                                                                                                                                                                                                                                                                                                                                                                                                                                                                                                                                                                                                                                                                                                                                                                                                                                                                                                                |                                                                                     |                                              |   |                                                                                     |                          |   |                                                                                     |                                             |   |                                                                                     |                                      |   |                                                                                     |                                                 |   |                                                                                     |                                                |   |                                                                                     |                         |   |
| <p>62. గత 3 నెలల కాలంలో, మీరు ఎంత తరచుగా నిండిన మలవిసర్జన కొరకు టాయ్లెట్ కు పరుగులు పెట్టినారు ?</p>                                                                                                                                                                                                                                                                                                                                                                                                                                        | <p>0.ఎప్పుడూ లేదు/చాలా తక్కువ</p> <p>1.అప్పుడప్పుడు</p> <p>2.ఎప్పుడైనా</p> <p>3.తరచుగా</p>                                                                                                                                                                                                                |                                                                                                                                                                                                                                                                                                                                                                                                                                                                                                                                                                                                                                                                                                                                                                                                                                                                                                                                                                                                                                                                                                                                                                                                                                                                                                                                  |                                                                                     |                                              |   |                                                                                     |                          |   |                                                                                     |                                             |   |                                                                                     |                                      |   |                                                                                     |                                                 |   |                                                                                     |                                                |   |                                                                                     |                         |   |



# ఎఫ్ బి డి-ఆర్3

తారీఖు: \_\_\_/\_\_\_/\_\_\_

గుర్తింపు: \_\_\_\_\_

తేది నెల సంవత్సరము

|                                                                                                                                     |                                                                                                                                                                                                                                                                                          |                                                                                                                    |
|-------------------------------------------------------------------------------------------------------------------------------------|------------------------------------------------------------------------------------------------------------------------------------------------------------------------------------------------------------------------------------------------------------------------------------------|--------------------------------------------------------------------------------------------------------------------|
| <p>a. ఇది ఎప్పుడు జరిగినది ?</p> <p>b. తీవ్రతను మీరెలా నిర్వచిస్తారు ?</p>                                                          | <p>4.చాలా తరచుగా</p> <p>1 బోజనానంతరం</p> <p>2 మీలో, పూర్తిగా/జరర వాయువు చేరిన భావన</p> <p>3 మీకు అన్నాశయపు నొప్పి ఉన్నప్పుడు</p> <p>4 మీరు వ్యాకుల పడినప్పుడు లేదా ఒత్తిడికి గురైనప్పుడు</p> <p>1 చాలా తేలికైన</p> <p>2 తేలికైన</p> <p>3 మితంగా</p> <p>4 ఉధృతంగా</p> <p>5 అధిక ఉధృతం</p> |                                                                                                                    |
| <p>63. 6 నెలలకు ఆ పైబడి మీకు తరచుగా పలుచని విరేచనాలు, జారుడు లేక నీళ్ళవిరేచనాలు కలిగినాయా ?</p>                                     | <p>0. అవును</p> <p>1. లేదు</p>                                                                                                                                                                                                                                                           |                                                                                                                    |
| <p>64. గత 3 నెలలుగా, నిండిన మీ మలవిసర్జనలో జిగురు లేక బంక ఉన్నదా ?</p>                                                              | <p>0.ఎప్పుడూ లేదు/చాలా తక్కువ</p> <p>1.అప్పుడప్పుడు</p> <p>2.ఎప్పుడైనా</p> <p>3.తరచుగా</p> <p>4.చాలా తరచుగా</p>                                                                                                                                                                          |                                                                                                                    |
| <p>65. గత 3 నెలల కాలంలో, మీలో ఎంతవరకు జరర వాయువు లేక వాయువుతో కడుపుబ్బడం జరిగింది? (కుడి ప్రక్కన ఇచ్చిన చిత్రపటంలో గుర్తించండి)</p> | <p>0. ఎప్పుడూ లేదు →→→→</p> <p>1. నెలలో ఒక రోజు కన్నా తక్కువ.</p> <p>2. నెలలో ఒక రోజు.</p> <p>3.నెలలో రెండు లేదా మూడు రోజులు.</p> <p>4.వారంలో ఒక రోజు.</p> <p>5.వారంలో ఒక రోజు కన్నా ఎక్కువ.</p> <p>6.ప్రతీ రోజు</p>                                                                     | <p>67వ ప్రశ్నకు వెళ్ళండి</p> 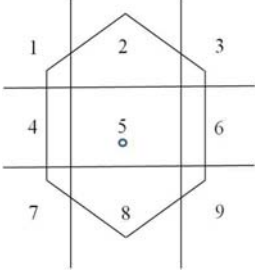 |
| <p>66. మీ యొక్క జరరవాయువులు లేక కడుపుబ్బే లక్షణాలు 6 నెలల క్రితం ప్రారంభమయ్యాయా ?</p>                                               | <p>0. అవును</p> <p>1. లేదు</p>                                                                                                                                                                                                                                                           |                                                                                                                    |

# ఎఫ్ బి డి-ఆర్3

తారీఖు: \_\_\_ / \_\_\_ / \_\_\_

గుర్తింపు: \_\_\_\_\_

తేది నెల సంవత్సరము

|                                                                                                                                                        |                                                                                                                                                                                                                          |                                                                                                                  |
|--------------------------------------------------------------------------------------------------------------------------------------------------------|--------------------------------------------------------------------------------------------------------------------------------------------------------------------------------------------------------------------------|------------------------------------------------------------------------------------------------------------------|
| <p>67. గత 6 నెలలుగా, మీ కుడిప్రక్కన గల ఉదర పైభాగంలో లేక మధ్యభాగంలో నిలకడగా నొప్పి కలుగుతున్నదా ? (కుడి ప్రక్కన ఇచ్చిన చిత్రపటంలో గుర్తించండి)</p>      | <p>0. ఎప్పుడూ లేదు →→→→</p> <p>1. నెలలో ఒక రోజు కన్నా తక్కువ.</p> <p>2. నెలలో ఒక రోజు.</p> <p>3. నెలలో రెండు లేదా మూడు రోజులు.</p> <p>4. వారంలో ఒక రోజు.</p> <p>5. వారంలో ఒక రోజు కన్నా ఎక్కువ.</p> <p>6. ప్రతీ రోజు</p> | <p>72వ ప్రశ్నకు వెళ్ళండి</p> 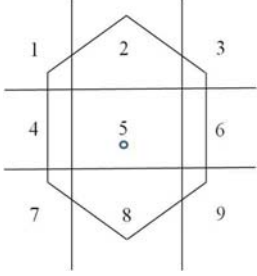 |
| <p>68. ఇటువంటి నొప్పి 30 నిమిషాలకు లేదా అంతకు మించి నిలుస్తుందా ?</p>                                                                                  | <p>0. ఎప్పుడూ లేదు/చాలా తక్కువ</p> <p>1. అప్పుడప్పుడు</p> <p>2. ఎప్పుడైనా</p> <p>3. తరచుగా</p> <p>4. చాలా తరచుగా</p>                                                                                                     |                                                                                                                  |
| <p>69. ఇటువంటి నొప్పి నిలకడగా నిలిచి, తీవ్ర దశకు మారుతుందా ?</p>                                                                                       | <p>0. ఎప్పుడూ లేదు/చాలా తక్కువ</p> <p>1. అప్పుడప్పుడు</p> <p>2. ఎప్పుడైనా</p> <p>3. తరచుగా</p> <p>4. చాలా తరచుగా</p>                                                                                                     |                                                                                                                  |
| <p>70. ఇటువంటి నొప్పి, మధ్య మధ్య ఘటనలతో పూర్తిగా తగ్గిపోతుండేదా ?</p>                                                                                  | <p>0. ఎప్పుడూ లేదు/చాలా తక్కువ</p> <p>1. అప్పుడప్పుడు</p> <p>2. ఎప్పుడైనా</p> <p>3. తరచుగా</p> <p>4. చాలా తరచుగా</p>                                                                                                     |                                                                                                                  |
| <p>71. ఇటువంటి నొప్పి రావడం వలన మీ దినచర్యలలో ఆటంకం ఏదైనా కలుగుతుండేదా, లేక డాక్టరు వద్దకు వెళ్ళేంతగా అవసరం కలిగేదా, లేక అత్యవసర సేవల అవసరంపడేదా ?</p> | <p>0. ఎప్పుడూ లేదు/చాలా తక్కువ</p> <p>1. అప్పుడప్పుడు</p> <p>2. ఎప్పుడైనా</p> <p>3. తరచుగా</p> <p>4. చాలా తరచుగా</p>                                                                                                     |                                                                                                                  |
| <p>72. మీ పిత్తాశయం తీసివేయబడిందా ?</p>                                                                                                                | <p>0. లేదు →→→→</p> <p>1. అవును</p>                                                                                                                                                                                      | <p>74వ ప్రశ్నకు వెళ్ళండి</p>                                                                                     |
| <p>73. మీ నుండి పిత్తాశయం తీసివేయబడిన తరువాత, తరచుగా ఈ నొప్పి వస్తుండేదా ?</p>                                                                         | <p>0. ఎప్పుడూ లేదు/చాలా తక్కువ</p> <p>1. అప్పుడప్పుడు</p>                                                                                                                                                                |                                                                                                                  |

# ఎఫ్ బి డి-ఆర్3

తారీఖు: \_\_\_\_ / \_\_\_\_ / \_\_\_\_

గుర్తింపు: \_\_\_\_\_

తేది నెల సంవత్సరము

|                                                                                                                     |                                                                                                                                                                                                                     |                              |
|---------------------------------------------------------------------------------------------------------------------|---------------------------------------------------------------------------------------------------------------------------------------------------------------------------------------------------------------------|------------------------------|
|                                                                                                                     | <p>2.ఎప్పడైనా</p> <p>3.తరచుగా</p> <p>4.చాలా తరచుగా</p>                                                                                                                                                              |                              |
| <p>74. అపాన వాయు వలన మీరెంతగా బాధింపబడ్డారు ?</p>                                                                   | <p>0.ఎప్పడూ లేదు/చాలా తక్కువ</p> <p>1.అప్పుడప్పుడు</p> <p>2.ఎప్పడైనా</p> <p>3.తరచుగా</p> <p>4.చాలా తరచుగా</p>                                                                                                       |                              |
| <p>75. నిద్రహం లేక అపానవాయువు కోల్పోవడం జరిగిందా?</p>                                                               | <p>0.ఎప్పడూ లేదు/చాలా తక్కువ</p> <p>1.అప్పుడప్పుడు</p> <p>2.ఎప్పడైనా</p> <p>3.తరచుగా</p> <p>4.చాలా తరచుగా</p>                                                                                                       |                              |
| <p>76. గత 3 నెలలలో, తరచుగా మీకు ప్రమాదవశాత్తు ద్రవంకారడం గాని లేక మలం పోవడంగాని జరిగేదా ?</p>                       | <p>0. ఎప్పడూ లేదు →→→→</p> <p>1. నెలలో ఒక రోజు కన్నా తక్కువ.</p> <p>2. నెలలో ఒక రోజు.</p> <p>3.నెలలో రెండు లేదా మూడు రోజులు.</p> <p>4.వారంలో ఒక రోజు.</p> <p>5.వారంలో ఒక రోజు కన్నా ఎక్కువ.</p> <p>6.ప్రతీ రోజు</p> | <p>79వ ప్రశ్నకు వెళ్ళండి</p> |
| <p>77. గత నెలలుగా, ఈ ద్రవంకారడం గాని లేక మలం పోవడం ఎంతమేరకు జరిగింది ?</p>                                          | <p>1 చిన్న మొత్తంలో (మరక మాత్రమే)</p> <p>2 పరిమిత మొత్తం ( మరక కంటి ఎక్కువ, కాని పూర్తి మలవిసర్జన కంటి తక్కువ)</p> <p>3 అధిక మొత్తం (పూర్తి మలవిసర్జన)</p>                                                          |                              |
| <p>78. గత సంవత్సరం ఈ ద్రవంకారడం గాని లేక మలం పోవడాల మేళవింపు ఎంత వరకు జరిగింది ?</p>                                | <p>1 ద్రవం/శ్లేషం(ఉమ్ము)</p> <p>2 మలం మాత్రమే</p> <p>3 ద్రవం/శ్లేషం(ఉమ్ము) మరియు మలం</p>                                                                                                                            |                              |
| <p>79. గత 3 నెలల కాలంలో, మలవిసర్జన చేయనపుడు తరచుగా మీకు నొప్పి, వేదన లేక మలద్వారంలో, మలాశయంలో ఒత్తిడి కలిగాయా ?</p> | <p>0. ఎప్పడూ లేదు →→→→</p> <p>1. నెలలో ఒక రోజు కన్నా తక్కువ.</p> <p>2. నెలలో ఒక రోజు.</p> <p>3.నెలలో రెండు లేదా మూడు రోజులు.</p>                                                                                    | <p>83వ ప్రశ్నకు వెళ్ళండి</p> |

# ఎఫ్ బి డి-ఆర్3

తారీఖు: \_\_\_\_ / \_\_\_\_ / \_\_\_\_

గుర్తింపు: \_\_\_\_\_

తేది నెల సంవత్సరము

|                                                                                                                          |                                                                                                                 |  |
|--------------------------------------------------------------------------------------------------------------------------|-----------------------------------------------------------------------------------------------------------------|--|
|                                                                                                                          | <p>4.వార0లో ఒక రోజు.</p> <p>5.వార0లో ఒక రోజు కన్నా ఎక్కువ.</p> <p>6.ప్రతీ రోజు</p>                              |  |
| <p>80. మీకెంత సమయం వరకు ఈ నోప్పి, వేదన లేక గుదంలో, మలాశయంలో ఒత్తిడి నిలువరించింది ?</p>                                  | <p>1. ఒక సెకండు నుండి 20 నిమిషముల వరకు పూర్తిగా తగ్గిపోయిందా</p> <p>2.20 నిమిషముల నుండి కొన్ని రోజుల వరకు</p>   |  |
| <p>81. మలద్వారంలో, లేక మలాశయంలో మీకు కలిగిన ఈ ఒత్తిడి లేక నోప్పి అదేరోజు పూర్తిగా తగ్గిపోతుండేదా ?</p>                   | <p>0. అవును</p> <p>1. లేదు</p>                                                                                  |  |
| <p>82. గత 6 నెలలుగా ఈ నోప్పి, వేదన లేక మలద్వారంలో,మలాశయంలో ఒత్తిడి మొదలైనదా ?</p>                                        | <p>0. అవును</p> <p>1. లేదు</p>                                                                                  |  |
| <p>83. గత 3 నెలల నుండి, ఎంత తరచుగా మీ కంఠద్వని లో తేడా లేక బొంగురు గొంతుక వచ్చాయి ?</p>                                  | <p>0.ఎప్పుడూ లేదు/చాలా తక్కువ</p> <p>1.అప్పుడప్పుడు</p> <p>2.ఎప్పుడైనా</p> <p>3.తరచుగా</p> <p>4.చాలా తరచుగా</p> |  |
| <p>84. గత 3 నెలల నుండి, ఎంత తరచుగా మీ గొంతుకలో తేడా లేక మెడ లేక గొంతుకలో నోప్పి, అనారోగ్యంతో ఉన్నారు.</p>                | <p>0.ఎప్పుడూ లేదు/చాలా తక్కువ</p> <p>1.అప్పుడప్పుడు</p> <p>2.ఎప్పుడైనా</p> <p>3.తరచుగా</p> <p>4.చాలా తరచుగా</p> |  |
| <p>85. గత 3 నెలలుగా, తరచుగా మీకు, శ్రమపడినప్పుడు చాతీలో నోప్పి, లేక గుండెసమస్యకు సంబంధించిన చాతీ నోప్పి వస్తుండేదా ?</p> | <p>0.ఎప్పుడూ లేదు/చాలా తక్కువ</p> <p>1.అప్పుడప్పుడు</p> <p>2.ఎప్పుడైనా</p> <p>3.తరచుగా</p> <p>4.చాలా తరచుగా</p> |  |

## ఎఫ్ బి డి-ఆర్3

తారీఖు: \_\_\_ / \_\_\_ / \_\_\_

గుర్తింపు: \_\_\_\_\_

తేది నెల సంవత్సరము

|                                                                          |                                                                                                     |  |
|--------------------------------------------------------------------------|-----------------------------------------------------------------------------------------------------|--|
| <p>86. గత 3 నెలలుగా, తరచుగా మీరు ఏదైనా మ్రింగడానికి కష్టపడుతున్నారా?</p> | <p>0.ఎప్పుడూ లేదు/దాలా తక్కువ<br/>1.అప్పుడప్పుడు<br/>2.ఎప్పుడైనా<br/>3.తరచుగా<br/>4.దాలా తరచుగా</p> |  |
|--------------------------------------------------------------------------|-----------------------------------------------------------------------------------------------------|--|

87. గత 3 నెలల కాలంలో, మీరు తీసుకున్నారా

a) హెచ్2ఆర్ఎ

అవును  లేదు

b) పిపిఐ

అవును  లేదు

c) ప్రొకినెటిక్స్

అవును  లేదు

d) పీచు

అవును  లేదు

e) ప్రొబియాటిక్స్

అవును  లేదు

f) మృదు విరేచనకారులు

అవును  లేదు

g) కండర సంకోచ వ్యాయామాల నిరోధానికి (యాంటీ స్పాస్మోడిక్స్)

అవును  లేదు

f) సాంప్రదాయక ఔషధాలు

అవును  లేదు

88. మీకున్న లక్షణాలకు మీరు తీసుకున్న చికిత్స ఎంతగా సహాయపడింది ?

1 మెరుగుపడింది  2 మార్పులేదు  3 ఇంకా పోలేంది

## 亚洲功能性胃肠病问卷

日期: \_\_\_/\_\_\_/\_\_\_  
日 月 年

姓名: \_\_\_\_\_

## 第二部分

以下调查的目的在于更好地了解人们有时出现的胃肠道问题。完成本问卷大约需40分钟。回答问题时，请在最能反映您症状的选项号码处画圈。当您回答下列问题，也许您会发现有些问题所涉及的症状是您并不存在的，此时，您会被提示跳过这些与您不相关的问题。如果您对某些问题的答案不是很肯定或者不记得时，请尽您所能地回答。并请您在完成问卷时检查回答过的问题，以确保没有遗漏。

|                                                                         |                                                                                                      |             |
|-------------------------------------------------------------------------|------------------------------------------------------------------------------------------------------|-------------|
| 1. 过去三个月中，咽喉部出现堵塞感、胀满感或有东西附着的感觉有多久了？                                    | 0 从来没有<br>1 每月小于一天<br>2 每月一天<br>3 每月两至三天<br>4 每周一天<br>5 每周大于一天<br>6 每天都有                             | 若选 0，跳至问题 5 |
| 2. 出现这种感觉是否有六个月或更长时间了？                                                  | 0 否<br>1 是                                                                                           |             |
| 3. 这种感觉出现在两餐之间吗（即非进食时）？<br><br>a. 这种感觉的出现与进食有关系吗？<br><br>b. 这种感觉通常有多严重？ | 0 否<br>1 是<br><br>0 否<br>1 餐前<br>2 餐中<br>3 餐后<br><br>1 非常轻微<br>2 轻微<br>3 中等<br>4 严重<br>5 非常严重        |             |
| 4. 进餐或饮水时，这种感觉会影响您的吞咽吗？<br><br>a. 进餐或饮水时，吞咽时有不适感吗？                      | 0 从来没有或极少<br>1 有时<br>2 经常<br>3 大多数时间<br>4 总是这样<br><br>0 从来没有或极少<br>1 有时<br>2 经常<br>3 大多数时间<br>4 总是这样 |             |

# 亚洲功能性胃肠病问卷

日期: \_\_\_/\_\_\_/\_\_\_  
日 月 年

姓名: \_\_\_\_\_

|                                                   |                                                                          |            |
|---------------------------------------------------|--------------------------------------------------------------------------|------------|
| 5. 过去三个月中，出现胸部中央疼痛或不适感（与心脏疾病无关）有多久？               | 0 从来没有<br>1 每月小于一天<br>2 每月一天<br>3 每月两至三天<br>4 每周一天<br>5 每周大于一天<br>6 每天都有 | 若选0，跳至问题8  |
| 6. 您胸痛的感觉是否有六个月或更长时间了？                            | 0 否<br>1 是                                                               |            |
| 7. 当您有胸痛时，是否会出现烧灼样的感觉？                            | 0 从来没有或极少<br>1 有时<br>2 经常<br>3 大多数时间<br>4 总是这样                           |            |
| 8. 过去三个月中，出现烧心（烧灼样痛或烧灼样不适）的频率是多少？                 | 0 从来没有<br>1 每月小于一天<br>2 每月一天<br>3 每月两至三天<br>4 每周一天<br>5 每周大于一天<br>6 每天都有 | 若选0，跳至问题10 |
| 9. 这种烧心症状（胸部烧灼痛或不适）是否有六个月或更长时间了？                  | 0 否<br>1 是                                                               |            |
| 10. 过去三个月中，出现吞咽固体食物或液体食物时，有食物在胸部停滞、通过缓慢的感觉的频率是多少？ | 0 从来没有<br>1 每月小于一天<br>2 每月一天<br>3 每月两至三天<br>4 每周一天<br>5 每周大于一天<br>6 每天都有 | 若选0，跳至问题13 |
| 11. 进食停滞感与烧心有关吗？                                  | 0 从来没有或极少<br>1 有时<br>2 经常<br>3 大多数时间<br>4 总是这样<br>5 难以回答                 |            |
| 12. 这种食物停滞感是否有六个月或更长时间了？                          | 0 否<br>1 是                                                               |            |

# 亚洲功能性胃肠病问卷

日期: \_\_\_\_/\_\_\_\_/\_\_\_\_  
日 月 年

姓名: \_\_\_\_\_

|                                                                                                                                                                                                                                     |                                                                                                                                                                                                                                                   |                                                                                                   |
|-------------------------------------------------------------------------------------------------------------------------------------------------------------------------------------------------------------------------------------|---------------------------------------------------------------------------------------------------------------------------------------------------------------------------------------------------------------------------------------------------|---------------------------------------------------------------------------------------------------|
| <p>13. 过去三个月中，进食正常餐量后，出现令人不适的饱胀感的频率是多少？</p>                                                                                                                                                                                         | <p>0 从来没有<br/>1 每月小于一天<br/>2 每月一天<br/>3 每月两至三天<br/>4 每周一天<br/>5 每周大于一天<br/>6 每天都有</p>                                                                                                                                                             | <p>若选 0，跳至问题 15</p>                                                                               |
| <p>14. 这种餐后异常饱胀感是否有六个月或更长时间了？</p> <p>a) 这种饱胀感与进食多少有关吗？</p> <p>b) 通常，这种腹部饱胀感位于什么位置？</p> <p>c) 请在右图中标出这种腹部饱胀感的位置。如果不只一个部位，请只标出症状最严重的那一个部位。</p> <p>d) 您通过什么方式使腹部饱胀感得到最大程度的缓解？</p> <p>e) 您觉得这种腹部饱胀感有多严重？</p> <p>f) 当腹部饱胀时，您是否急于上厕所？</p> | <p>0 否<br/>1 是</p> <p>0 否<br/>1 常规进食<br/>2 大量进食<br/>3 少量进食</p> <p>1 上腹部<br/>2 下腹部<br/>3 肚脐周围<br/>4 整个腹部<br/>5 胸部</p> <p>1 通过排便<br/>2 通过排气<br/>3 两者都有<br/>4 没有<br/>5 嗝气</p> <p>1 非常轻微<br/>2 轻微<br/>3 中等<br/>4 严重<br/>5 非常严重</p> <p>0 否<br/>1 是</p> | <p>14c)</p> 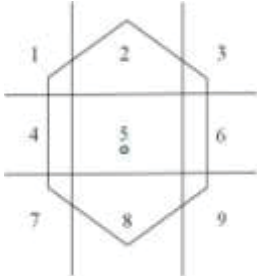 |



# 亚洲功能性胃肠病问卷

日期: \_\_\_/\_\_\_/\_\_\_  
日 月 年

姓名: \_\_\_\_\_

|                                                                                                                                  |                                                                                                                            |                                                                                                          |
|----------------------------------------------------------------------------------------------------------------------------------|----------------------------------------------------------------------------------------------------------------------------|----------------------------------------------------------------------------------------------------------|
| <p>15. 过去三个月中，不能完成平时进食量的频率是多少？</p>                                                                                               | <p>0 从来没有<br/>1 每月小于一天<br/>2 每月一天<br/>3 每月两至三天<br/>4 每周一天<br/>5 每周大于一天<br/>6 每天都有</p>                                      | <p>若选 0，跳至问题 17</p>                                                                                      |
| <p>16. 不能完成平时进食量的情况是否有六个月或更长时间了？</p>                                                                                             | <p>0 否<br/>1 是</p>                                                                                                         |                                                                                                          |
| <p>17. 过去三个月中，出现中上腹部（脐上但非胸部）疼痛或烧灼感（请在右图标出）的频率是多少？</p> <p>a) 请在右图中标出这种中上腹部疼痛或烧灼感的位置。如果不只一个部位，请只标出症状最严重的那一个部位。</p> <p>b) 您的感觉是</p> | <p>0 从来没有<br/>1 每月小于一天<br/>2 每月一天<br/>3 每月两至三天<br/>4 每周一天<br/>5 每周大于一天<br/>6 每天都有</p> <p>1 只有痛<br/>2 只有烧灼感<br/>3 痛和烧灼感</p> | <p>若选 0，跳至问题 26</p>  |
| <p>18. 这种疼痛或烧灼感是否有六个月或更长时间了？</p>                                                                                                 | <p>0 否<br/>1 是</p>                                                                                                         |                                                                                                          |
| <p>19. 这种疼痛或烧灼感出现后，会在当天完全消失吗？</p>                                                                                                | <p>0 从来没有或极少<br/>1 有时<br/>2 经常<br/>3 大多数时间<br/>4 总是这样</p>                                                                  |                                                                                                          |
| <p>20. 通常这种中上腹部（脐上）疼痛或烧灼感有多严重？</p>                                                                                               | <p>1 非常轻微<br/>2 轻微<br/>3 中等<br/>4 严重<br/>5 非常严重</p>                                                                        |                                                                                                          |
| <p>21. 疼痛或烧灼感与进食有关吗？</p>                                                                                                         | <p>0 不受进食影响<br/>1 进食后疼痛加重<br/>2 进食后疼痛减轻</p>                                                                                |                                                                                                          |

# 亚洲功能性胃肠病问卷

日期: \_\_\_\_/\_\_\_\_/\_\_\_\_  
           日    月    年

姓名: \_\_\_\_\_

|                                                                                                        |                                                                                                                                                                                                                                                                             |                    |
|--------------------------------------------------------------------------------------------------------|-----------------------------------------------------------------------------------------------------------------------------------------------------------------------------------------------------------------------------------------------------------------------------|--------------------|
| <p>22. 服用抗酸药可以缓解这种疼痛或烧灼感吗？</p>                                                                         | <p>0 从来没有或极少<br/>           1 有时<br/>           2 经常<br/>           3 大多数时间<br/>           4 总是这样</p>                                                                                                                                                                       |                    |
| <p>23. 排便或肛门排气后，这种疼痛或烧灼感会好转或消失吗？</p> <p>a) 排便或肛门排气后，这种疼痛或烧灼感会好转吗？</p> <p>b) 排便或肛门排气后，这种疼痛或烧灼感会加重吗？</p> | <p>0 从来没有或极少<br/>           1 有时<br/>           2 经常<br/>           3 大多数时间<br/>           4 总是这样</p> <p>0 不会<br/>           1 排便之后<br/>           2 肛门排气之后<br/>           3 排便及排气之后</p> <p>0 不会<br/>           1 排便之后<br/>           2 肛门排气之后<br/>           3 排便及排气之后</p> |                    |
| <p>24. 出现疼痛或烧灼感时，排便次数会发生改变吗？（增多或减少）</p>                                                                | <p>0 从来没有或极少<br/>           1 有时<br/>           2 经常<br/>           3 大多数时间<br/>           4 总是这样</p>                                                                                                                                                                       |                    |
| <p>25. 出现疼痛或烧灼感时，大便会变得更稀或更干吗？</p>                                                                      | <p>0 从来没有或极少<br/>           1 有时<br/>           2 经常<br/>           3 大多数时间<br/>           4 总是这样</p>                                                                                                                                                                       |                    |
| <p>26. 过去三个月中，出现令人不快的恶心症状的频率是多少？</p>                                                                   | <p>0 从来没有<br/>           1 每月小于一天<br/>           2 每月一天<br/>           3 每月两至三天<br/>           4 每周一天<br/>           5 每周大于一天<br/>           6 每天都有</p>                                                                                                                     | <p>若选0，跳至问题 28</p> |
| <p>27. 这种恶心是否有六个月或更长时间了？</p>                                                                           | <p>0 否<br/>           1 是</p>                                                                                                                                                                                                                                               |                    |

# 亚洲功能性胃肠病问卷

日期: \_\_\_/\_\_\_/\_\_\_  
 日 月 年

姓名: \_\_\_\_\_

|                                         |                                                                          |             |
|-----------------------------------------|--------------------------------------------------------------------------|-------------|
| 28. 过去三个月中，呕吐的频率是多少？                    | 0 从来没有<br>1 每月小于一天<br>2 每月一天<br>3 每月两至三天<br>4 每周一天<br>5 每周大于一天<br>6 每天都有 | 若选0，跳至问题 33 |
| 29. 这样的呕吐是否有六个月或更长时间了？                  | 0 否<br>1 是                                                               |             |
| 30. 您有强迫自己呕吐过吗？                         | 0 从来没有或极少<br>1 有时<br>2 经常<br>3 大多数时间<br>4 总是这样                           |             |
| 31. 过去一年中，您有过在几天内出现间歇性呕吐并消失吗？           | 0 从来没有或极少<br>1 有时<br>2 经常<br>3 大多数时间<br>4 总是这样                           | 若选0，跳至问题 33 |
| 32. 过去一年中，您至少有过三次间歇性的发作性呕吐吗？            | 0 否<br>1 是                                                               |             |
| 33. 过去三个月中，出现食物反流至口中的频率是多少？             | 0 从来没有<br>1 每月小于一天<br>2 每月一天<br>3 每月两至三天<br>4 每周一天<br>5 每周大于一天<br>6 每天都有 | 若选0，跳至问题 39 |
| 34. 您的这个问题（食物反流至口中）是否已经超过六个月或更长时间了？     | 0 否<br>1 是                                                               |             |
| 35. 当有食物反流时，在您吞下或吐出之前食物是否通常会在您的口中停留一会儿？ | 0 从来没有或极少<br>1 有时<br>2 经常<br>3 大多数时间<br>4 总是这样                           |             |
| 36. 在食物反流入口之前，您有干呕吗？                    | 0 从来没有或极少<br>1 有时<br>2 经常<br>3 大多数时间<br>4 总是这样                           |             |

# 亚洲功能性胃肠病问卷

日期: \_\_\_/\_\_\_/\_\_\_  
日 月 年

姓名: \_\_\_\_\_

|                                                                                                                                                                   |                                                                                                                                                                                    |                     |
|-------------------------------------------------------------------------------------------------------------------------------------------------------------------|------------------------------------------------------------------------------------------------------------------------------------------------------------------------------------|---------------------|
| <p>37. 当食物反流入口之前, 您出现呕吐或感到胃部不适的频率是多少?</p>                                                                                                                         | <p>0 从来没有或极少<br/>1 有时<br/>2 经常<br/>3 大多数时间<br/>4 总是这样</p>                                                                                                                          |                     |
| <p>38. 当食物有酸味或变馊时, 就不会再有反流了吗?</p>                                                                                                                                 | <p>0 从来没有或极少<br/>1 有时<br/>2 经常<br/>3 大多数时间<br/>4 总是这样</p>                                                                                                                          |                     |
| <p>39. 过去三个月中, 出现令人烦恼的暖气的频率是多少?</p>                                                                                                                               | <p>0 从来没有<br/>1 每月小于一天<br/>2 每月一天<br/>3 每月两至三天<br/>4 每周一天<br/>5 每周大于一天<br/>6 每天都有</p>                                                                                              | <p>若选0, 跳至问题 41</p> |
| <p>40. 这种令人烦恼的暖气是否开始于六个月前?</p> <p>a) 您进食前是否会暖气?</p> <p>b) 您进食中是否会暖气?</p> <p>c) 您进食后是否会暖气?</p> <p>d) 您是否有与进食无关的暖气?</p> <p>e) 暖气通常有多严重?</p> <p>f) 通常暖气在什么之后会好转?</p> | <p>0 否<br/>1 是</p> <p>1 非常轻微<br/>2 轻微<br/>3 中等<br/>4 严重<br/>5 非常严重</p> <p>1 排便<br/>2 肛门排气<br/>3 进食</p> |                     |

# 亚洲功能性胃肠病问卷

日期: \_\_\_\_/\_\_\_\_/\_\_\_\_  
日 月 年

姓名: \_\_\_\_\_

|                                                                                            |                                                                                                                            |                                                                                                         |
|--------------------------------------------------------------------------------------------|----------------------------------------------------------------------------------------------------------------------------|---------------------------------------------------------------------------------------------------------|
| <p>g) 暖气时伴有什麼？</p> <p>h) 暖气可以通过什麼得到缓解呢？</p>                                                | <p>1 腹胀<br/>2 腹痛<br/>3 烧心<br/>4 食物反流入口<br/>5 液体反流入口</p> <p>1 进食<br/>2. 肛门排气<br/>3 排大便后<br/>4 抗酸药或其它减少胃酸的药物<br/>5 以上均不是</p> |                                                                                                         |
| <p>41. 过去三个月中，出现腹部任意部位的不适或疼痛的频率是多少？</p> <p>a) 请在右图中标出这种疼痛的位置。如果不只一个部位，请只标出症状最严重的那一个部位。</p> | <p>0 从来没有<br/>1 每月小于一天<br/>2 每月一天<br/>3 每月两至三天<br/>4 每周一天<br/>5 每周大于一天<br/>6 每天都有</p>                                      | <p>若选0，跳至问题 52</p>  |
| <p>42. 您仅有疼痛吗？（没有不适感，也没有疼痛合并不适感）</p> <p>a) 您有</p>                                          | <p>0 从来没有或极少<br/>1 有时<br/>2 经常<br/>3 大多数时间<br/>4 总是这样</p> <p>1 只有痛<br/>2 只有不适感<br/>3 痛和不适感</p>                             |                                                                                                         |
| <p>43. 女性回答：您的疼痛或不适感是否仅在经期出现，而不发生于其它时间？</p>                                                | <p>0 否<br/>1 是<br/>2 不适用（已停经或男性）</p>                                                                                       |                                                                                                         |
| <p>44. 当您疼痛时，这种症状会影响或限制您的日常生活吗（例如，工作、家庭事务、社交活动）？</p>                                       | <p>0 从来没有或极少<br/>1 有时<br/>2 经常<br/>3 大多数时间<br/>4 总是这样</p>                                                                  |                                                                                                         |
| <p>45. 疼痛或不适是否有六个月或更长时间了？</p>                                                              | <p>0 否<br/>1 是</p>                                                                                                         |                                                                                                         |

# 亚洲功能性胃肠病问卷

日期: \_\_\_/\_\_\_/\_\_\_  
日 月 年

姓名: \_\_\_\_\_

|                                                              |                                                                                                                     |  |
|--------------------------------------------------------------|---------------------------------------------------------------------------------------------------------------------|--|
| <p>46. 这种疼痛或不适在排便后改善或消失吗？</p> <p>a) 这种疼痛或不适在排便后加重吗？</p>      | <p>0 从来没有或极少<br/>1 有时<br/>2 经常<br/>3 大多数时间<br/>4 总是这样</p> <p>0 从来没有或极少<br/>1 有时<br/>2 经常<br/>3 大多数时间<br/>4 总是这样</p> |  |
| <p>47. 当出现疼痛或不适时，排便次数是否增多？</p>                               | <p>0 从来没有或极少<br/>1 有时<br/>2 经常<br/>3 大多数时间<br/>4 总是这样</p>                                                           |  |
| <p>48. 当出现疼痛或不适时，排便次数是否减少？</p>                               | <p>0 从来没有或极少<br/>1 有时<br/>2 经常<br/>3 大多数时间<br/>4 总是这样</p>                                                           |  |
| <p>49. 当出现疼痛或不适时，大便是否变稀？</p>                                 | <p>0 从来没有或极少<br/>1 有时<br/>2 经常<br/>3 大多数时间<br/>4 总是这样</p>                                                           |  |
| <p>50. 当出现疼痛或不适时，大便是否会变硬？</p>                                | <p>0 从来没有或极少<br/>1 有时<br/>2 经常<br/>3 大多数时间<br/>4 总是这样</p>                                                           |  |
| <p>51. 这种疼痛或不适会随活动或改变体位而改善吗？</p> <p>* 您可以休息5分钟再继续回答第52题。</p> | <p>0 从来没有或极少<br/>1 有时<br/>2 经常<br/>3 大多数时间<br/>4 总是这样</p>                                                           |  |
| <p>52. 过去三个月中，您有排便次数小于3 (0-2) 次/周的情况吗？</p>                   | <p>0 从来没有或极少<br/>1 有时<br/>2 经常</p>                                                                                  |  |

# 亚洲功能性胃肠病问卷

日期: \_\_\_/\_\_\_/\_\_\_  
日 月 年

姓名: \_\_\_\_\_

|                                                                                 |                                                                                               |  |
|---------------------------------------------------------------------------------|-----------------------------------------------------------------------------------------------|--|
|                                                                                 | 3 大多数时间<br>4 总是这样<br>5 记不得或难以判断                                                               |  |
| 53. 过去三个月中, 您是否出现过干结的大便?                                                        | 0 从来没有或极少<br>1 有时<br>2 经常<br>3 大多数时间<br>4 总是这样                                                |  |
| 54. 过去三个月中, 您是否出现过排便费力?                                                         | 0 从来没有或极少<br>1 有时<br>2 经常<br>3 大多数时间<br>4 总是这样                                                |  |
| 55. 过去三个月中, 您是否在便后出现排便不尽感?                                                      | 0 从来没有或极少<br>1 有时<br>2 经常<br>3 大多数时间<br>4 总是这样                                                |  |
| 56. 过去三个月中, 是否在排便过程中出现阻塞感?<br><br>a) 您排便困难是因为大便____?                            | 0 从来没有或极少<br>1 有时<br>2 经常<br>3 大多数时间<br>4 总是这样<br><br>1 太大<br>2 太细<br>3 太硬<br>4 太干<br>5 以上均不是 |  |
| b) 您排便困难是因为____?                                                                | 1 没有便意<br>2 无力推动<br>3 可以推动但受阻                                                                 |  |
| 57. 过去三个月中, 为了完全排空大便您是否需要挤压腹部或肛门周围或用手抠出大便?<br><br>a) 过去三个月中, 您是否不得不通过以下的方式来排出大便 | 0 从来没有或极少<br>1 有时<br>2 经常<br>3 大多数时间<br>4 总是这样                                                |  |

# 亚洲功能性胃肠病问卷

日期: \_\_\_\_/\_\_\_\_/\_\_\_\_  
           日    月    年

姓名: \_\_\_\_\_

|                                        |                                                              |  |
|----------------------------------------|--------------------------------------------------------------|--|
| a) 用手指抠                                | 0 否<br>1 是                                                   |  |
| b) 用水冲洗                                | 0 否<br>1 是                                                   |  |
| c) 插入栓剂                                | 0 否<br>1 是                                                   |  |
| d) 灌肠                                  | 0 否<br>1 是                                                   |  |
| 58. 过去三个月中，在排便过程中您是否感到难以放松让大便顺利排出？     | 0 从来没有或极少<br>1 有时<br>2 经常<br>3 大多数时间<br>4 总是这样               |  |
| 59. 52 – 58中的便秘症状是否有六个月了？              | 0 否<br>1 是                                                   |  |
| 60. 过去三个月中，出现大便次数 $\geq$ 4次/天情况的频率是多少？ | 0 从来没有或极少<br>1 有时<br>2 经常<br>3 大多数时间<br>4 总是这样<br>5 记不得或难以判断 |  |
| 61. 过去三个月中，出现松散、糊状或水样大便情况的频率是多少？       | 0 从来没有或极少<br>1 有时<br>2 经常<br>3 大多数时间<br>4 总是这样               |  |
| 62. 过去三个月中，至少3/4次的大便是松散、糊状或水样的吗？       | 0 否<br>1 是<br>2 难以判断                                         |  |
| a) 您觉得您的排便情况怎么样？                       | 1 便秘<br>2 腹泻<br>3 有时便秘有时腹泻<br>4 以上均不是                        |  |
| b) 您每周的平均排便次数是多少？                      | _____ 次/周                                                    |  |



# 亚洲功能性胃肠病问卷

日期: \_\_\_/\_\_\_/\_\_\_  
日 月 年

姓名: \_\_\_\_\_

|                                                                                                                                                |                                                                                                                                                                       |                                                                                                                                                                                                                                                                                                                                                                                                                                                                                                                                                                                                                                                                                                                                                                                                                                                                                                                                                                                                                                                                                                                                                                                                                                                                     |                                                                                     |                                              |   |                                                                                     |                          |   |                                                                                     |                                             |   |                                                                                     |                                      |   |                                                                                     |                                                 |   |                                                                                     |                                                |   |                                                                                     |                         |   |
|------------------------------------------------------------------------------------------------------------------------------------------------|-----------------------------------------------------------------------------------------------------------------------------------------------------------------------|---------------------------------------------------------------------------------------------------------------------------------------------------------------------------------------------------------------------------------------------------------------------------------------------------------------------------------------------------------------------------------------------------------------------------------------------------------------------------------------------------------------------------------------------------------------------------------------------------------------------------------------------------------------------------------------------------------------------------------------------------------------------------------------------------------------------------------------------------------------------------------------------------------------------------------------------------------------------------------------------------------------------------------------------------------------------------------------------------------------------------------------------------------------------------------------------------------------------------------------------------------------------|-------------------------------------------------------------------------------------|----------------------------------------------|---|-------------------------------------------------------------------------------------|--------------------------|---|-------------------------------------------------------------------------------------|---------------------------------------------|---|-------------------------------------------------------------------------------------|--------------------------------------|---|-------------------------------------------------------------------------------------|-------------------------------------------------|---|-------------------------------------------------------------------------------------|------------------------------------------------|---|-------------------------------------------------------------------------------------|-------------------------|---|
| <p>*c) 标出您通常排便的类型</p> <p>i) 当您正常时<br/>ii) 当您便秘时<br/>iii) 当您腹泻时<br/>iv) 大部分时间<br/>v) 感觉不好时</p> <p>*根据Bristol Stool Scale Form 图，在空格中填上适当的数字</p> | <p>i) B SS no.<br/>ii) BSS no.<br/>iii) BSS no.<br/>iv) BSS no.<br/>v) BSS no. _____</p>                                                                              | <table border="1"> <caption>Bristol Stool Scale Form (BSS)</caption> <tr> <td></td> <td>Separate hard lumps, like nuts, hard to pass</td> <td>1</td> </tr> <tr> <td></td> <td>Sausage-shaped but lumpy</td> <td>2</td> </tr> <tr> <td></td> <td>Like sausage but with cracks on its surface</td> <td>3</td> </tr> <tr> <td></td> <td>Like sausage or snake, smooth &amp; soft</td> <td>4</td> </tr> <tr> <td></td> <td>Soft blobs with clear cut edges (passed easily)</td> <td>5</td> </tr> <tr> <td></td> <td>Fluffy pieces with ragged edges, a mushy stool</td> <td>6</td> </tr> <tr> <td></td> <td>Watery, no solid pieces</td> <td>7</td> </tr> </table> |  | Separate hard lumps, like nuts, hard to pass | 1 |  | Sausage-shaped but lumpy | 2 |  | Like sausage but with cracks on its surface | 3 |  | Like sausage or snake, smooth & soft | 4 |  | Soft blobs with clear cut edges (passed easily) | 5 |  | Fluffy pieces with ragged edges, a mushy stool | 6 |  | Watery, no solid pieces | 7 |
|                                                             | Separate hard lumps, like nuts, hard to pass                                                                                                                          | 1                                                                                                                                                                                                                                                                                                                                                                                                                                                                                                                                                                                                                                                                                                                                                                                                                                                                                                                                                                                                                                                                                                                                                                                                                                                                   |                                                                                     |                                              |   |                                                                                     |                          |   |                                                                                     |                                             |   |                                                                                     |                                      |   |                                                                                     |                                                 |   |                                                                                     |                                                |   |                                                                                     |                         |   |
|                                                             | Sausage-shaped but lumpy                                                                                                                                              | 2                                                                                                                                                                                                                                                                                                                                                                                                                                                                                                                                                                                                                                                                                                                                                                                                                                                                                                                                                                                                                                                                                                                                                                                                                                                                   |                                                                                     |                                              |   |                                                                                     |                          |   |                                                                                     |                                             |   |                                                                                     |                                      |   |                                                                                     |                                                 |   |                                                                                     |                                                |   |                                                                                     |                         |   |
|                                                             | Like sausage but with cracks on its surface                                                                                                                           | 3                                                                                                                                                                                                                                                                                                                                                                                                                                                                                                                                                                                                                                                                                                                                                                                                                                                                                                                                                                                                                                                                                                                                                                                                                                                                   |                                                                                     |                                              |   |                                                                                     |                          |   |                                                                                     |                                             |   |                                                                                     |                                      |   |                                                                                     |                                                 |   |                                                                                     |                                                |   |                                                                                     |                         |   |
|                                                             | Like sausage or snake, smooth & soft                                                                                                                                  | 4                                                                                                                                                                                                                                                                                                                                                                                                                                                                                                                                                                                                                                                                                                                                                                                                                                                                                                                                                                                                                                                                                                                                                                                                                                                                   |                                                                                     |                                              |   |                                                                                     |                          |   |                                                                                     |                                             |   |                                                                                     |                                      |   |                                                                                     |                                                 |   |                                                                                     |                                                |   |                                                                                     |                         |   |
|                                                             | Soft blobs with clear cut edges (passed easily)                                                                                                                       | 5                                                                                                                                                                                                                                                                                                                                                                                                                                                                                                                                                                                                                                                                                                                                                                                                                                                                                                                                                                                                                                                                                                                                                                                                                                                                   |                                                                                     |                                              |   |                                                                                     |                          |   |                                                                                     |                                             |   |                                                                                     |                                      |   |                                                                                     |                                                 |   |                                                                                     |                                                |   |                                                                                     |                         |   |
|                                                             | Fluffy pieces with ragged edges, a mushy stool                                                                                                                        | 6                                                                                                                                                                                                                                                                                                                                                                                                                                                                                                                                                                                                                                                                                                                                                                                                                                                                                                                                                                                                                                                                                                                                                                                                                                                                   |                                                                                     |                                              |   |                                                                                     |                          |   |                                                                                     |                                             |   |                                                                                     |                                      |   |                                                                                     |                                                 |   |                                                                                     |                                                |   |                                                                                     |                         |   |
|                                                             | Watery, no solid pieces                                                                                                                                               | 7                                                                                                                                                                                                                                                                                                                                                                                                                                                                                                                                                                                                                                                                                                                                                                                                                                                                                                                                                                                                                                                                                                                                                                                                                                                                   |                                                                                     |                                              |   |                                                                                     |                          |   |                                                                                     |                                             |   |                                                                                     |                                      |   |                                                                                     |                                                 |   |                                                                                     |                                                |   |                                                                                     |                         |   |
| <p>63. 过去三个月中，您出现排便急迫感的频率是多少？</p> <p>a. 排便急迫感会在什么时候出现？</p> <p>b. 您觉得这种情况有多严重？</p>                                                              | <p>0 从来没有或极少<br/>1 有时<br/>2 经常<br/>3 大多数时间<br/>4 总是这样</p> <p>1 餐后<br/>2 当您觉得饱/胀<br/>3 当您有上腹部痛时<br/>4 当您焦急或紧张时</p> <p>1 非常轻微<br/>2 轻微<br/>3 中等<br/>4 严重<br/>5 非常严重</p> |                                                                                                                                                                                                                                                                                                                                                                                                                                                                                                                                                                                                                                                                                                                                                                                                                                                                                                                                                                                                                                                                                                                                                                                                                                                                     |                                                                                     |                                              |   |                                                                                     |                          |   |                                                                                     |                                             |   |                                                                                     |                                      |   |                                                                                     |                                                 |   |                                                                                     |                                                |   |                                                                                     |                         |   |
| <p>64. 您频繁出现排松散、糊状或水样大便的时间超过六个月了吗？</p>                                                                                                         | <p>0 否<br/>1 是</p>                                                                                                                                                    |                                                                                                                                                                                                                                                                                                                                                                                                                                                                                                                                                                                                                                                                                                                                                                                                                                                                                                                                                                                                                                                                                                                                                                                                                                                                     |                                                                                     |                                              |   |                                                                                     |                          |   |                                                                                     |                                             |   |                                                                                     |                                      |   |                                                                                     |                                                 |   |                                                                                     |                                                |   |                                                                                     |                         |   |
| <p>65. 过去三个月中，您出现大便中含粘液或粘脓的频率是多少？</p>                                                                                                          | <p>0 从来没有或极少<br/>1 有时<br/>2 经常<br/>3 大多数时间<br/>4 总是这样</p>                                                                                                             |                                                                                                                                                                                                                                                                                                                                                                                                                                                                                                                                                                                                                                                                                                                                                                                                                                                                                                                                                                                                                                                                                                                                                                                                                                                                     |                                                                                     |                                              |   |                                                                                     |                          |   |                                                                                     |                                             |   |                                                                                     |                                      |   |                                                                                     |                                                 |   |                                                                                     |                                                |   |                                                                                     |                         |   |

# 亚洲功能性胃肠病问卷

日期: \_\_\_/\_\_\_/\_\_\_  
日 月 年

姓名: \_\_\_\_\_

|                                                                                                                                                                           |                                                                                                                                                |                                                                                                          |
|---------------------------------------------------------------------------------------------------------------------------------------------------------------------------|------------------------------------------------------------------------------------------------------------------------------------------------|----------------------------------------------------------------------------------------------------------|
| <p>66. 过去三个月中，出现腹部胀气或腹部膨胀的频率是多少？</p> <p>a)请在右图中标出这种腹胀的位置。如果不只一个部位，请只标出症状最严重的那一个部位。</p> <p>b) 这种腹胀在排便后是否能缓解？</p> <p>c) 这种腹胀是否与大便次数过多或过少有关？</p> <p>d) 这种腹胀是否与大便偏硬或偏软有关？</p> | <p>0 从来没有<br/>1 每月小于一天<br/>2 每月一天<br/>3 每月两至三天<br/>4 每周一天<br/>5 每周大于一天<br/>6 每天都有</p> <p>0 否<br/>1 是</p> <p>0 否<br/>1 是</p> <p>0 否<br/>1 是</p> | <p>若选0，跳至问题 68</p> 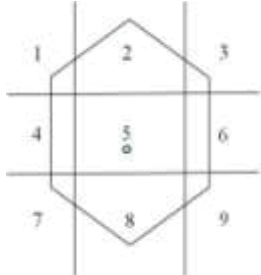   |
| <p>67. 这种腹部胀气或腹部膨胀是否超过六个月了？</p>                                                                                                                                           | <p>0 否<br/>1 是</p>                                                                                                                             |                                                                                                          |
| <p>68. 过去六个月中，您上腹中部或右侧出现持续性疼痛的频率是多少？（请在右图标出）</p> <p>a)请在右图中标出这种腹胀的位置。如果不只一个部位，请只标出症状最严重的那一个部位。</p>                                                                        | <p>0 从来没有<br/>1 每月小于一天<br/>2 每月一天<br/>3 每月两至三天<br/>4 每周一天<br/>5 每周大于一天<br/>6 每天都有</p>                                                          | <p>若选0，跳至问题 75</p>  |
| <p>69. 这种疼痛会持续30分钟或更长时间吗？</p>                                                                                                                                             | <p>0 从来没有或极少<br/>1 有时<br/>2 经常<br/>3 大多数时间<br/>4 总是这样</p>                                                                                      |                                                                                                          |

# 亚洲功能性胃肠病问卷

日期: \_\_\_\_/\_\_\_\_/\_\_\_\_  
           日    月    年

姓名: \_\_\_\_\_

|                                     |                                                                          |             |
|-------------------------------------|--------------------------------------------------------------------------|-------------|
| 70. 这种疼痛已经发展到持续且严重的程度了吗？            | 0 从来没有或极少<br>1 有时<br>2 经常<br>3 大多数时间<br>4 总是这样                           |             |
| 71. 这种疼痛在二次发作间期会完全消失吗？              | 0 从来没有或极少<br>1 有时<br>2 经常<br>3 大多数时间<br>4 总是这样                           |             |
| 72. 这种疼痛有多少次会使您停止日常活动，或迫使您去看医生或看急诊？ | 0 从来没有或极少<br>1 有时<br>2 经常<br>3 大多数时间<br>4 总是这样                           |             |
| 73. 您曾做过胆囊切除术吗？                     | 0 否<br>1 是                                                               | 若选0，跳至问题 75 |
| 74. 胆囊切除后，您出现这种疼痛的频率是多少？            | 0 从来没有或极少<br>1 有时<br>2 经常<br>3 大多数时间<br>4 总是这样                           |             |
| 75. 您受胃肠胀气的困扰有多大？                   | 0 从来没有或极少<br>1 有时<br>2 经常<br>3 大多数时间<br>4 总是这样                           |             |
| 76. 您有没有控制不住的肛门排气？                  | 0 从来没有或极少<br>1 有时<br>2 经常<br>3 大多数时间<br>4 总是这样                           |             |
| 77. 过去三个月中，您出现肛门漏出液状或固体粪便的频率有多少？    | 0 从来没有<br>1 每月小于一天<br>2 每月一天<br>3 每月两至三天<br>4 每周一天<br>5 每周大于一天<br>6 每天都有 | 若选0，跳至问题 80 |

# 亚洲功能性胃肠病问卷

日期: \_\_\_/\_\_\_/\_\_\_  
日 月 年

姓名: \_\_\_\_\_

|                                           |                                                                          |             |
|-------------------------------------------|--------------------------------------------------------------------------|-------------|
| 78. 过去三个月中，您发生大便渗漏时流出量是多少？                | 1 少量（污染衬裤）<br>2 中等（较污染衬裤严重，但非完全排便）<br>3 大量（完全排便）                         |             |
| 79. 过去三个月中，发生大便渗漏时流出物成分如何？                | 1 仅有液状/粘液<br>2 仅有粪便<br>3 两者都有                                            |             |
| 80. 过去三个月中，不排便时，您出现直肠、肛管疼痛或刺痛，及压迫感的频率是多少？ | 0 从来没有<br>1 每月小于一天<br>2 每月一天<br>3 每月两至三天<br>4 每周一天<br>5 每周大于一天<br>6 每天都有 | 若选0，跳至问题 84 |
| 81. 这种酸胀、疼痛或压迫感会持续多长时间？                   | 1 数秒至20分钟内然后完全消失<br>2 超过20分钟甚至几天或更长                                      |             |
| 82. 这种直肠肛管处的酸胀、疼痛或压迫感出现后会在当天完全消失吗？        | 0 否<br>1 是                                                               |             |
| 83. 这种直肠肛管处的酸胀、疼痛或压迫感是否在六个月前就开始了？         | 0 否<br>1 是                                                               |             |
| 84. 过去三个月中，您出现持续的或加重的声音嘶哑的频率是多少？          | 0 从来没有或极少<br>1 有时<br>2 经常<br>3 大多数时间<br>4 总是这样                           |             |
| 85. 过去三个月中，您出现持续的或加重的脖子或喉咙痛的频率是多少？        | 0 从来没有或极少<br>1 有时<br>2 经常<br>3 大多数时间<br>4 总是这样                           |             |
| 86. 过去三个月中，您出现用力时胸痛或与心脏问题相关的胸痛的频率是多少？     | 0 从来没有或极少<br>1 有时<br>2 经常<br>3 大多数时间<br>4 总是这样                           |             |

# 亚洲功能性胃肠病问卷

日期: \_\_\_/\_\_\_/\_\_\_  
日 月 年

姓名: \_\_\_\_\_

|                           |                                                                                                        |  |
|---------------------------|--------------------------------------------------------------------------------------------------------|--|
| 87. 过去三个月中，您出现吞咽困难的频率是多少？ | 0 从来没有或极少<br>1 有时<br>2 经常<br>3 大多数时间<br>4 总是这样                                                         |  |
| 88. 您是否满意目前的治疗？           | 1. 满意<br>2. 不满意，因为没有得到充分的解释<br>3. 不满意，因为没有得到充分的检查<br>4. 不满意，因为没有得到足够的药物治疗<br>5. 未就诊<br>6. 不满意，因为治疗没有效果 |  |



Tanggal / / (hr/bln/thn)

**Indonesian EAR3Q**

Inisial Subyek:

5. Luar biasa

4. Sangat baik

3. Baik

2. Cukup

1. Kurang

7. Keluhan apa yang paling anda rasakan mengganggu?

1. Nyeri abdomen
2. Perut tidak nyaman
3. Kembung
4. BAB yang tidak selesai / tidak lampias
5. Tidak dapat menikmati makanan
6. Pencernaan tidak baik
7. Rasa terbakar pada perut
8. Mengedan
9. BAB yang tak tertahankan

8. Apakah anda baru-baru ini merasakan gejala-gejala yang berkaitan dengan pencernaan?

1. Ya
2. Tidak

9. Berapa lama anda merasakan gejala saluran pencernaan yang baru-baru ini? .... bulan

10. Secara keseluruhan, sesungguhnya sudah berapa lama Anda merasakan gejala-gejala yang berkaitan dengan pencernaan?

1. Tidak pernah
2. Kurang dari 3 bulan terakhir
3. Lebih dari 3 bulan atau kurang dari 6 bulan
4. Lebih dari 6 bulan

**BAGIAN B**

Tujuan survei berikut adalah untuk mempelajari lebih jauh masalah kesehatan yang terkadang dirasakan pada perut dan usus. Kuesioner membutuhkan waktu sekitar 40 menit. Untuk menjawab setiap pertanyaan, lingkari nomor yang paling akurat menggambarkan gejala anda. Anda mungkin tidak merasakan gejala yang kami tanyakan, atau tidak dapat mengingatnya, jawablah sebaik yang anda bisa. Anda mungkin melewatkan beberapa pertanyaan, jadi harap periksa ulang jawaban anda.

1. Dalam 3 bulan terakhir, seberapa sering anda merasakan rasa mengganjal, rasa penuh atau ada yang tersangkut di tenggorokan anda?
  0. Tidak pernah → lanjutkan langsung ke pertanyaan No.4
  1. Kurang dari sehari dalam sebulan
  2. Sehari dalam sebulan
  3. Dua atau tiga hari dalam sebulan
  4. Sehari dalam seminggu
  5. Lebih dari sehari dalam seminggu
  6. Setiap hari
2. Apakah anda pernah merasakan perasaan tersebut dalam 6 bulan atau lebih?
  0. Tidak
  1. Ya
3. Apakah perasaan tersebut terjadi diantara makan (bukan saat makan)?
  0. Tidak
  1. Ya
    - a. Apakah perasaan tersebut timbul berkaitan dengan makan?
      0. Tidak
      1. Sebelum makan
      2. Selama makan
      3. Setelah makan
    - b. Biasanya seberapa berat perasaan tersebut?
      1. Sangat ringan
      2. Ringan
      3. Sedang
      4. Berat
      5. Sangat berat
4. Ketika makan atau minum, apakah menyakitkan untuk menelan?
  0. Tidak pernah atau jarang



1. Kadang-kadang
  2. Sering
  3. Kebanyakan
  4. Selalu
- a. Ketika makan atau minum, apakah anda merasa nyeri atau tidak nyaman saat menelan?
0. Tidak pernah atau jarang
  1. Kadang-kadang
  2. Sering
  3. Kebanyakan
  4. Selalu
5. Dalam 3 bulan terakhir, seberapa sering anda merasakan nyeri atau tidak nyaman pada bagian tengah dada (yang tidak berhubungan dengan penyakit jantung)?
0. Tidak pernah → lanjutkan langsung ke pertanyaan No.8
  1. Kurang dari sehari dalam sebulan
  2. Sehari dalam sebulan
  3. Dua atau tiga hari dalam sebulan
  4. Sehari dalam seminggu
  5. Lebih dari sehari dalam seminggu
  6. Setiap hari
6. Apakah anda merasakan nyeri dada ini selama 6 bulan atau lebih?
0. Tidak
  1. Ya
7. Saat anda merasakan nyeri dada, seberapa sering terasa seperti rasa panas membakar?
0. Tidak pernah atau jarang
  1. Kadang-kadang
  2. Sering
  3. Kebanyakan
  4. Selalu
8. Dalam tiga bulan terakhir, seberapa sering anda merasakan rasa panas yang tidak nyaman atau nyeri seperti terbakar di dada anda?
0. Tidak pernah → lanjutkan langsung ke pertanyaan No.10
  1. Kurang dari sehari dalam sebulan
  2. Sehari dalam sebulan
  3. Dua atau tiga hari dalam sebulan
  4. Sehari dalam seminggu

5. Lebih dari sehari dalam seminggu
6. Setiap hari
9. Apakah anda pernah merasakan rasa panas yang tidak nyaman atau nyeri seperti terbakar di dada anda) dalam 6 bulan atau lebih?
  0. Tidak
  1. Ya
10. Dalam 3 bulan terakhir, seberapa sering makanan atau minuman tersangkut setelah ditelan atau terasa turun dengan pelan di dada anda?
  0. Tidak pernah → lanjutkan langsung ke pertanyaan No.13
  1. Kurang dari sehari dalam sebulan
  2. Sehari dalam sebulan
  3. Dua atau tiga hari dalam sebulan
  4. Sehari dalam seminggu
  5. Lebih dari sehari dalam seminggu
  6. Setiap hari
11. Apakah gejala makanan yang tersangkut berhubungan dengan heartburn / rasa panas di dada?
  0. Tidak pernah atau jarang
  1. Kadang-kadang
  2. Sering
  3. Kebanyakan
  4. Selalu
  5. Sulit dijawab
12. Apakah anda memiliki masalah tersebut dalam 6 bulan atau lebih?
  0. Tidak
  1. Ya
13. Dalam 3 bulan terakhir, seberapa sering perut anda tidak nyaman dan terasa penuh setelah makan dengan porsi biasa?
  0. Tidak pernah → lanjutkan langsung ke pertanyaan No.15
  1. Kurang dari sehari dalam sebulan
  2. Sehari dalam sebulan
  3. Dua atau tiga hari dalam sebulan
  4. Sehari dalam seminggu
  5. Lebih dari sehari dalam seminggu
  6. Setiap hari
14. Apakah anda pernah merasakan rasa penuh dan tidak nyaman setelah makan dalam 6 bulan atau lebih?

0. Tidak
1. Ya
  - a. Apakah perasaan penuh dan tidak nyaman tersebut berhubungan dengan makan?
    0. Tidak
    1. Ya, setelah makan dengan porsi besar
    2. Ya, setelah makan dengan porsi biasa
    3. Ya, setelah makan dengan porsi sedikit
  - b. Biasanya dimana rasa penuh tersebut dirasakan?
    1. Perut bagian atas
    2. Perut bagian bawah
    3. Sekitar pusat
    4. Seluruh perut
    5. Dada
  - c. Tandai pada diagram dibawah ini lokasi rasa penuh tersebut. Jika anda memiliki lebih dari satu lokasi, tandai hanya pada tempat yang paling mengganggu anda.

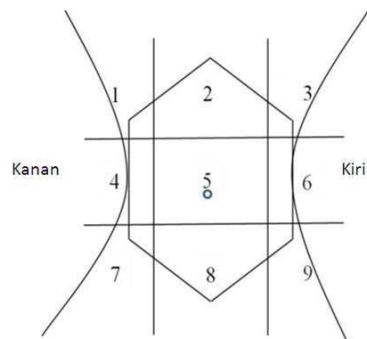

- d. Bagaimana rasa penuh tersebut berkurang / hilang?
  1. Dengan buang air besar
  2. Dengan buang angin
  3. Keduanya
  4. Tidak ada
  5. Sendawa
- e. Seberapa parah rasa penuh tersebut?
  1. Sangat ringan
  2. Ringan
  3. Sedang
  4. Berat
  5. Sangat berat

- f. Selama rasa penuh tersebut, apakah anda merasa ingin segera pergi ke kamar mandi?
0. Tidak
  1. Ya
15. Dalam 3 bulan terakhir, seberapa sering anda tidak dapat menghabiskan makanan porsi biasa?
0. Tidak pernah → lanjutkan langsung ke pertanyaan No.17
  1. Kurang dari sehari dalam sebulan
  2. Sehari dalam sebulan
  3. Dua atau tiga hari dalam sebulan
  4. Sehari dalam seminggu
  5. Lebih dari sehari dalam seminggu
  6. Setiap hari
16. Apakah anda pernah mengalami ketidakmampuan menghabiskan makanan porsi biasa dalam 6 bulan atau lebih?
0. Tidak
  1. Ya
17. Dalam 3 bulan terakhir, seberapa sering anda merasakan nyeri atau rasa terbakar di bagian tengah perut anda, diatas pusat anda, tapi tidak di dada anda?
0. Tidak pernah → lanjutkan langsung ke pertanyaan No.26
  1. Kurang dari sehari dalam sebulan
  2. Sehari dalam sebulan
  3. Dua atau tiga hari dalam sebulan
  4. Sehari dalam seminggu
  5. Lebih dari sehari dalam seminggu
  6. Setiap hari
- a. Tandai pada diagram dibawah ini, lokasi dari nyeri atau rasa terbakar. Jika anda mengalami beberapa lokasi, tandai hanya pada tempat yang anda rasakan paling mengganggu.

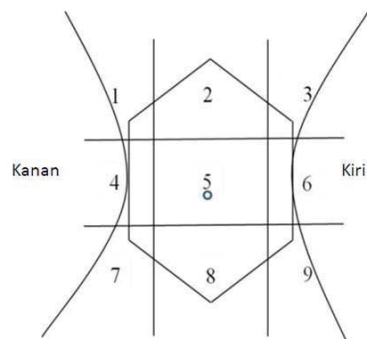

- b. Apakah anda memiliki:

1. Nyeri saja
  2. Rasa terbakar saja
  3. Nyeri dan rasa terbakar
18. Apakah anda merasakan nyeri atau rasa terbakar ini dalam 6 bulan atau lebih?
0. Tidak
  1. Ya
19. Apakah perasaan nyeri atau terbakar ini terjadi dan hilang sepenuhnya dalam satu hari yang sama?
0. Tidak pernah atau jarang
  1. Kadang-kadang
  2. Sering
  3. Kebanyakan
  4. Selalu
20. Biasanya, seberapa parah nyeri atau terbakar pada perut bagian tengah anda, diatas pusat?
1. Sangat ringan
  2. Ringan
  3. Sedang
  4. Berat
  5. Sangat berat
21. Bagaimana rasa nyeri atau terbakar ini dipengaruhi oleh makanan?
0. Tidak terpengaruh oleh makanan
  1. Bertambah setelah makan
  2. Berkurang setelah makan
22. Apakah rasa nyeri atau terbakar ini hilang dengan meminum antacid?
0. Tidak pernah atau jarang
  1. Kadang-kadang
  2. Sering
  3. Kebanyakan
  4. Selalu
23. Apakah nyeri atau rasa terbakar ini berkurang atau hilang setelah terasa BAB atau buang angin?
0. Tidak pernah atau jarang
  1. Kadang-kadang
  2. Sering
  3. Kebanyakan
  4. Selalu
- a. Apakah rasa nyeri atau terbakar tersebut berkurang dengan BAB atau buang angin?

0. Tidak
  1. Setelah BAB
  2. Setelah buang angin
  3. Keduanya
- b. Apakah rasa nyeri atau terbakar tersebut bertambah dengan BAB atau buang angin?
0. Tidak
  1. Setelah BAB
  2. Setelah buang angin
  3. Keduanya
24. Saat rasa nyeri atau terbakar ini tersebut dimulai, apakah anda biasanya merasakan perubahan BAB (baik berkurang atau bertambah?)
0. Tidak pernah atau jarang
  1. Kadang-kadang
  2. Sering
  3. Kebanyakan
  4. Selalu
25. Saat rasa nyeri atau rasa terbakar ini dimulai, apakah anda memiliki tinja yang lebih lembek atau lebih padat?
0. Tidak pernah atau jarang
  1. Kadang-kadang
  2. Sering
  3. Kebanyakan
  4. Selalu
26. Dalam 3 bulan terakhir, seberapa sering anda merasakan mual yang mengganggu?
0. Tidak pernah → lanjutkan langsung ke pertanyaan No.28
  1. Kurang dari sehari dalam sebulan
  2. Sehari dalam sebulan
  3. Dua atau tiga hari dalam sebulan
  4. Sehari dalam seminggu
  5. Lebih dari sehari dalam seminggu
  6. Setiap hari
27. Apakah mual ini dimulai lebih dari 6 bulan yang lalu?
0. Tidak
  1. Ya
28. Dalam 3 bulan terakhir, seberapa sering anda muntah?

0. Tidak pernah → lanjutkan langsung ke pertanyaan No. 33
  1. Kurang dari sehari dalam sebulan
  2. Sehari dalam sebulan
  3. Dua atau tiga hari dalam sebulan
  4. Sehari dalam seminggu
  5. Lebih dari sehari dalam seminggu
  6. Setiap hari
29. Apakah anda mengalami muntah ini dalam 6 bulan atau lebih?
0. Tidak
  1. Ya
30. Apakah anda sengaja membuat diri anda sendiri muntah?
0. Tidak pernah atau jarang
  1. Kadang-kadang
  2. Sering
  3. Kebanyakan
  4. Selalu
31. Apakah anda mengalami muntah-muntah dalam setahun yang terjadi dalam episode yang terpisah beberapa hari kemudian berhenti?
0. Tidak pernah atau jarang → lanjutkan langsung ke pertanyaan No. 33
  1. Kadang-kadang
  2. Sering
  3. Kebanyakan
  4. Selalu
32. Apakah anda setidaknya memiliki 3 episode selama 1 tahun sebelumnya?
0. Tidak
  1. Ya
33. Dalam 3 bulan terakhir, seberapa sering anda merasakan makanan anda yang telah ditelan kembali ke mulut anda?
0. Tidak pernah → lanjutkan langsung ke pertanyaan No. 39
  1. Kurang dari sehari dalam sebulan
  2. Sehari dalam sebulan
  3. Dua atau tiga hari dalam sebulan
  4. Sehari dalam seminggu
  5. Lebih dari sehari dalam seminggu
  6. Setiap hari

34. Apakah anda memiliki masalah ini (makanan kembali ke mulut anda setelah ditelan) selama 6 bulan atau lebih?
0. Tidak
  1. Ya
35. Saat makanan muncul kembali ke mulut anda, apakah makanan tersebut biasanya bertahan di mulut anda beberapa saat sampai anda menelannya kembali atau meludahkannya?
0. Tidak pernah atau jarang
  1. Kadang-kadang
  2. Sering
  3. Kebanyakan
  4. Selalu
36. Apakah anda merasakan gelombang sebelum makanan tersebut sampai ke mulut anda?
0. Tidak pernah atau jarang
  1. Kadang-kadang
  2. Sering
  3. Kebanyakan
  4. Selalu
37. Saat makanan tiba di mulut anda, seberapa sering anda muntah atau merasa mual di perut anda?
0. Tidak pernah atau jarang
  1. Kadang-kadang
  2. Sering
  3. Kebanyakan
  4. Selalu
38. Apakah makanan berhenti muncul ke mulut anda kembali jika asin atau asam?
0. Tidak pernah atau jarang
  1. Kadang-kadang
  2. Sering
  3. Kebanyakan
  4. Selalu
39. Dalam 3 bulan terakhir, seberapa sering anda merasakan sendawa yang mengganggu?
0. Tidak pernah → lanjutkan langsung ke pertanyaan No.41
  1. Kurang dari sehari dalam sebulan
  2. Sehari dalam sebulan
  3. Dua atau tiga hari dalam sebulan
  4. Sehari dalam seminggu



5. Lebih dari sehari dalam seminggu
  6. Setiap hari
40. Apakah sendawa yang mengganggu ini dimulai lebih dari 6 bulan yang lalu?
0. Tidak
  1. Ya
    - a. Apakah sendawa tersebut dimulai sebelum makan?
      0. Tidak
      1. Ya
    - b. Apakah anda mengalami sendawa selama makan?
      0. Tidak
      1. Ya
    - c. Apakah anda sendawa setelah makan?
      0. Tidak
      1. Ya
    - d. Apakah anda mengalami sendawa tidak berkaitan dengan makanan?
      0. Tidak
      1. Ya
    - e. Biasanya seberapa parah sendawa tersebut?
      1. Sangat ringan
      2. Ringan
      3. Sedang
      4. Berat
      5. Sangat berat
    - f. Apakah sendawa tersebut membaik setelah:
      1. BAB
      2. Buang angin
      3. Makan
    - g. Apakah sendawa tersebut terjadi bersamaan dengan
      1. Kembung
      2. Nyeri abdomen
      3. Rasa terbakar pada perut
      4. Makanan kembali naik ke mulut
      5. Cairan kembali naik ke mulut
    - h. Apakah sendawa tersebut hilang dengan
      1. Makanan

2. Buang angin
  3. BAB
  4. Antasid atau obat penurun asam lambung
  5. Tidak ada satupun di atas
41. Dalam 3 bulan terakhir, seberapa sering anda mengalami nyeri atau rasa tidak nyaman di perut anda?
0. Tidak pernah → lanjutkan langsung ke pertanyaan No. 52
  1. Kurang dari sehari dalam sebulan
  2. Sehari dalam sebulan
  3. Dua atau tiga hari dalam sebulan
  4. Sehari dalam seminggu
  5. Lebih dari sehari dalam seminggu
  6. Setiap hari
- a. Tandai dalam diagram dibawah ini lokasi nyeri tersebut. Jika terjadi pada lebih dari satu lokasi, tandai hanya pada tempat yang anda rasakan paling mengganggu.

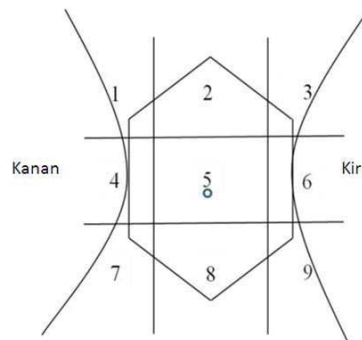

42. Apakah anda hanya merasakan nyeri (bukan rasa tidak nyaman, bukan juga campuran nyeri dan tidak nyaman)?
0. Tidak pernah atau jarang
  1. Kadang-kadang
  2. Sering
  3. Kebanyakan
  4. Selalu
- a. Apakah anda mengalami
1. Hanya nyeri
  2. Hanya tidak nyaman
  3. Nyeri dan tidak nyaman
43. Untuk perempuan: apakah rasa tidak nyaman atau nyeri ini terjadi hanya selama menstruasi dan tidak terjadi saat lain?

0. Tidak
  1. Ya
  2. Pertanyaan tidak dapat dijawab karena pasien laki-laki, atau perempuan yang telah menopause
44. Saat anda merasakan nyeri ini, seberapa sering hal tersebut membatasi aktivitas sehari-hari anda (contohnya bekerja, pekerjaan rumah tangga, dan aktivitas sosial)?
0. Tidak pernah atau jarang
  1. Kadang-kadang
  2. Sering
  3. Kebanyakan
  4. Selalu
45. Apakah anda mengalami rasa tidak nyaman atau nyeri dalam 6 bulan atau lebih?
0. Tidak
  1. Ya
46. Seberapa sering rasa tidak nyaman atau nyeri ini membaik atau menghilang setelah terasa BAB?
0. Tidak pernah atau jarang
  1. Kadang-kadang
  2. Sering
  3. Kebanyakan
  4. Selalu
- a. Seberapa sering rasa tidak nyaman atau nyeri tersebut memburuk setelah BAB?
0. Tidak pernah atau jarang
  1. Kadang-kadang
  2. Sering
  3. Kebanyakan
  4. Selalu
47. Saat anda merasakan rasa tidak nyaman dan nyeri, apakah BAB anda semakin sering?
0. Tidak pernah atau jarang
  1. Kadang-kadang
  2. Sering
  3. Kebanyakan
  4. Selalu
48. Saat rasa tidak nyaman atau nyeri ini dimulai, apakah BAB anda semakin jarang?
0. Tidak pernah atau jarang
  1. Kadang-kadang
  2. Sering

3. Kebanyakan
  4. Selalu
49. Saat rasa tidak nyaman atau nyeri ini dimulai, apakah tinja anda semakin lembek?
0. Tidak pernah atau jarang
  1. Kadang-kadang
  2. Sering
  3. Kebanyakan
  4. Selalu
50. Saat rasa tidak nyaman atau nyeri ini dimulai, seberapa sering anda mengalami tinja yang mengeras?
0. Tidak pernah atau jarang
  1. Kadang-kadang
  2. Sering
  3. Kebanyakan
  4. Selalu
51. Seberapa sering rasa tidak nyaman atau nyeri ini hilang dengan bergerak atau mengubah posisi?
0. Tidak pernah atau jarang
  1. Kadang-kadang
  2. Sering
  3. Kebanyakan
  4. Selalu

**Anda mungkin ingin mengambil istirahat 5 menit sebelum melanjutkan ke pertanyaan No.52**

52. Dalam 3 bulan terakhir, seberapa sering anda mengalami BAB yang kurang dari 3 kali (0-2) seminggu ?
0. Tidak pernah atau jarang
  1. Kadang-kadang
  2. Sering
  3. Kebanyakan
  4. Selalu
  5. Sulit ditentukan
53. Dalam 3 bulan terakhir, seberapa sering anda mengalami tinja yang keras?
0. Tidak pernah atau jarang
  1. Kadang-kadang
  2. Sering
  3. Kebanyakan
  4. Selalu

54. Dalam 3 bulan terakhir, seberapa sering anda mengedan selama BAB?
0. Tidak pernah atau jarang
  1. Kadang-kadang
  2. Sering
  3. Kebanyakan
  4. Selalu
55. Dalam 3 bulan terakhir, seberapa sering anda merasa tidak selesainya pengosongan perut setelah BAB?
0. Tidak pernah atau jarang
  1. Kadang-kadang
  2. Sering
  3. Kebanyakan
  4. Selalu
56. Dalam 3 bulan terakhir, seberapa sering anda merasakan sensasi bahwa tinja anda tidak akan bisa lewat (misalkan tersumbat) saat mengalami BAB?
0. Tidak pernah atau jarang
  1. Kadang-kadang
  2. Sering
  3. Kebanyakan
  4. Selalu
- a. Apakah anda merasakan kesulitan mengeluarkan tinja karena
1. Terlalu besar
  2. Terlalu tipis
  3. Terlalu keras
  4. Terlalu kering
  5. Bukan salah satu di atas
- b. Apakah anda merasakan kesulitan mengeluarkan tinja karena
1. Tidak ada keinginan BAB
  2. Lemahnya tekanan
  3. Dapat menekan keluar namun tersumbat
57. Dalam 3 bulan terakhir, seberapa sering anda menekan pantat atau sekitarnya untuk mengeluarkan tinja untuk menyelesaikan BAB?
0. Tidak pernah atau jarang
  1. Kadang-kadang
  2. Sering
  3. Kebanyakan

4. Selalu
  - a. Dalam 3 bulan terakhir, apakah anda harus memasukkan jari anda untuk mengeluarkan tinja?
    0. Tidak
    1. Ya
  - b. Dalam 3 bulan terakhir, apakah anda harus menyiram dengan air untuk mengeluarkan tinja?
    0. Tidak
    1. Ya
  - c. Dalam 3 bulan terakhir, apakah anda harus memasukkan supositoria untuk mengeluarkan tinja?
    0. Tidak
    1. Ya
  - d. Dalam 3 bulan terakhir, apakah anda harus memasukkan enema untuk mengeluarkan tinja?
    0. Tidak
    1. Ya
58. Dalam 3 bulan terakhir, seberapa sering anda mengalami kesulitan rileks atau membiarkan tinja keluar selama BAB?
  0. Tidak pernah atau jarang
  1. Kadang-kadang
  2. Sering
  3. Kebanyakan
  4. Selalu
59. Apakah ada gejala konstipasi yang tertulis dalam pertanyaan 52-58 diatas dimulai lebih dari 6 bulan yang lalu?
  0. Tidak
  1. Ya
60. Dalam 3 bulan terakhir, seberapa sering anda mengalami 4 atau lebih BAB dalam sehari?
  0. Tidak pernah atau jarang
  1. Kadang-kadang
  2. Sering
  3. Kebanyakan
  4. Selalu
  5. Sulit untuk ditentukan
61. Dalam 3 bulan terakhir, seberapa sering anda mengeluarkan tinja lembek atau encer?
  0. Tidak pernah atau jarang
  1. Kadang-kadang
  2. Sering

3. Kebanyakan
  4. Selalu
62. Dalam 3 bulan terakhir, apakah setidaknya tiga per empat bagian dari tinja anda lembek atau encer?
0. Tidak
  1. Ya
  2. Sulit untuk ditentukan
- a. Bagaimana kebiasaan buang air besar anda?
    1. Konstipasi
    2. Diare
    3. Kadang konstipasi kadang diare
    4. Bukan salah satu di atas
  - b. Berapa kali anda buang air besar per minggu? ..... kali seminggu
  - c. Tandai tipe tinja anda saat anda sedang sehat\*
  - d. Tandai tipe tinja anda ketika anda sedang sulit buang air besar / konstipasi\*
  - e. Tandai tipe tinja anda ketika anda sedang diare\*
  - f. Tandai tipe tinja anda yang paling sering dialami\*
  - g. Tandai tipe tinja anda ketika anda merasa paling parah\*

**Type 1**

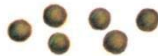

Butiran keras terpisah, seperti kotoran kambing (sulit dikeluarkan)

**Type 2**

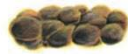

Tinja seperti sosis yang permukaannya berbenjol-benjol

**Type 3**

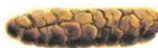

Bentuk tinja seperti sosis dengan retakan di permukaannya

**Type 4**

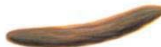

Bentuk tinja mirip sosis atau ular dengan permukaan licin dan lembut

**Type 5**

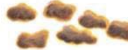

Gumpalan lunak dengan tepi yang rata (dapat lewat dengan mudah)

**Type 6**

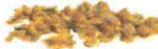

Potongan tinja lembek dengan tepian yang tidak rata

**Type 7**

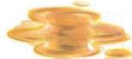

Tinja encer, tidak ada bagian yang padat, sepenuhnya cairan

\* Tandai sesuai *Bristol Stool Scale* (BSS) diagram dan isilah sesuai nomor gambar tinja tersebut

63. Dalam 3 bulan terakhir, seberapa sering anda harus terburu-buru ke toilet saat BAB?
0. Tidak pernah atau jarang
  1. Kadang-kadang
  2. Sering

3. Kebanyakan
4. Selalu
- a. Kapan hal ini terjadi?
  1. Setelah makan
  2. Saat merasa penuh atau kembung
  3. Saat nyeri ulu hati
  4. Saat gelisah atau stres
- b. Bagaimana anda mendefinisikan keparahannya?
  1. Sangat ringan
  2. Ringan
  3. Sedang
  4. Berat
  5. Sangat berat
64. Apakah anda mulai mengalami tinja lembek dan encer lebih dari 6 bulan yang lalu?
  0. Tidak
  1. Ya
65. Dalam 3 bulan terakhir, seberapa sering terdapat lendir saat BAB?
  0. Tidak pernah atau jarang
  1. Kadang-kadang
  2. Sering
  3. Kebanyakan
  4. Selalu
66. Dalam 3 bulan terakhir, seberapa sering perut anda kembung atau distensi?
  0. Tidak pernah → lanjutkan langsung ke pertanyaan No.68
  1. Kurang dari sehari dalam sebulan
  2. Sehari dalam sebulan
  3. Dua atau tiga hari dalam sebulan
  4. Sehari dalam seminggu
  5. Lebih dari sehari dalam seminggu
  6. Setiap hari
  - a. Tandai pada diagra di bawah, lokasi dari kembung atau distensi. Jika anda memiliki lebih dari satu lokasi, tandai satu tempat yang paling mengganggu



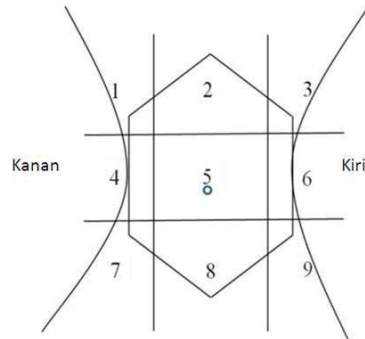

- b. Apakah rasa kembung atau distensi ini hilang dengan buang air besar?
0. Tidak
  1. Ya
- c. Apakah rasa kembung atau distensi ini berkaitan dengan sering atau tidaknya buang air besar?
0. Tidak
  1. Ya
- d. Apakah rasa kembung atau distensi ini berhubungan dengan tinja yang lebih padat atau lembek?
0. Tidak
  1. Ya
67. Apakah gejala kembung atau distensi anda dimulai lebih dari 6 bulan yang lalu?
0. Tidak
  1. Ya
68. Dalam 6 bulan terakhir, seberapa sering anda mengalami nyeri tajam pada bagian tengah atau kanan perut bagian atas anda?
0. Tidak pernah → lanjutkan langsung ke pertanyaan No.75
  1. Kurang dari sehari dalam sebulan
  2. Sehari dalam sebulan
  3. Dua atau tiga hari dalam sebulan
  4. Sehari dalam seminggu
  5. Lebih dari sehari dalam seminggu
  6. Setiap hari
- a. Tandai pada diagram di bawah ini, lokasi dari nyeri. Jika anda memiliki lebih dari satu lokasi, tandai tempat yang paling mengganggu anda.

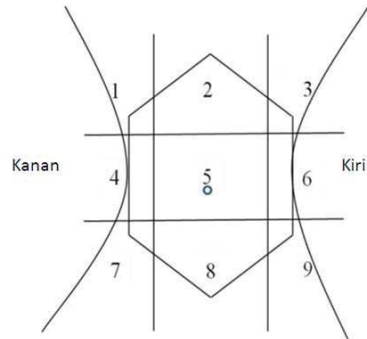

69. Apakah nyeri ini berlangsung selama 30 menit atau lebih?
0. Tidak pernah atau jarang
  1. Kadang-kadang
  2. Sering
  3. Kebanyakan
  4. Selalu
70. Apakah nyeri ini kemudian terasa semakin berat dan tajam?
0. Tidak pernah atau jarang
  1. Kadang-kadang
  2. Sering
  3. Kebanyakan
  4. Selalu
71. Apakah nyeri ini hilang sama sekali di antara kekambuhannya?
0. Tidak pernah atau jarang
  1. Kadang-kadang
  2. Sering
  3. Kebanyakan
  4. Selalu
72. Apakah nyeri ini membatasi aktivitas anda, atau menyebabkan anda mendatangi dokter atau unit gawat darurat sesegera mungkin?
0. Tidak pernah atau jarang
  1. Kadang-kadang
  2. Sering
  3. Kebanyakan
  4. Selalu
73. Apakah kantong empedu anda pernah diangkat?
0. Tidak → Lanjutkan ke pertanyaan No.75

1. Ya
74. Seberapa sering anda mengalami nyeri ini sejak kantung empedu anda diangkat?
0. Tidak pernah atau jarang
  1. Kadang-kadang
  2. Sering
  3. Kebanyakan
  4. Selalu
75. Seberapa sering anda terganggu oleh perut kembung?
0. Tidak pernah atau jarang
  1. Kadang-kadang
  2. Sering
  3. Kebanyakan
  4. Selalu
76. Apakah anda mengalami kesulitan buang angin?
0. Tidak pernah atau jarang
  1. Kadang-kadang
  2. Sering
  3. Kebanyakan
  4. Selalu
77. Dalam 3 bulan terakhir, seberapa sering anda secara tidak sengaja buang air besar, baik cair maupun padat?
0. Tidak pernah → lanjutkan langsung ke pertanyaan No.80
  1. Kurang dari sehari dalam sebulan
  2. Sehari dalam sebulan
  3. Dua atau tiga hari dalam sebulan
  4. Sehari dalam seminggu
  5. Lebih dari sehari dalam seminggu
  6. Setiap hari
78. Dalam 3 bulan terakhir, saat ketidaksengajaan tersebut terjadi, seberapa banyak tinja yang keluar?
1. Sedikit sekali jumlahnya/hanya menodai celana
  2. Jumlah sedang (lebih dari menodai celana, namun lebih sedikit daripada buang air besar biasa)
  3. Jumlah yang banyak (seperti buang air besar lengkap)
79. Dalam 1 tahun terakhir, saat ketidaksengajaan tersebut terjadi, bagaimana komposisi tinja tersebut?
1. Cairan/lendir saja
  2. Tinja saja

3. Baik cairan/lendir dan tinja
80. Dalam 3 bulan terakhir, seberapa sering anda mengalami nyeri atau tertekan di anus atau rektum anda saat anda tidak ingin BAB?
0. Tidak pernah → lanjutkan langsung ke pertanyaan No.84
  1. Kurang dari sehari dalam sebulan
  2. Sehari dalam sebulan
  3. Dua atau tiga hari dalam sebulan
  4. Sehari dalam seminggu
  5. Lebih dari sehari dalam seminggu
  6. Setiap hari
81. Seberapa lama rasa nyeri atau tertekan itu dirasakan?
1. Dari beberapa detik sampai 20 menit dan menghilang sama sekali
  2. Lebih dari 20 menit dan sampai beberapa hari atau lebih
82. Apakah rasa nyeri di anus dan rektum itu terjadi lalu hilang dalam 1 hari yang sama?
0. Tidak
  1. Ya
83. Apakah nyeri atau rasa tertekan di saluran anus atau rektum tersebut dimulai sejak lebih dari 6 bulan yang lalu?
0. Tidak
  1. Ya
84. Dalam 3 bulan terakhir, seberapa sering anda mengalami suara serak yang terus menerus dan memberat?
0. Tidak pernah atau jarang
  1. Kadang-kadang
  2. Sering
  3. Kebanyakan
  4. Selalu
85. Dalam 3 bulan terakhir, seberapa sering anda mengalami sakit tenggorokan atau nyeri leher yang terus menerus atau memberat?
0. Tidak pernah atau jarang
  1. Kadang-kadang
  2. Sering
  3. Kebanyakan
  4. Selalu
86. Dalam 3 bulan terakhir, seberapa sering anda mengalami nyeri dada saat beraktivitas, atau nyeri dada yang berkaitan dengan sakit jantung?

0. Tidak pernah atau jarang
  1. Kadang-kadang
  2. Sering
  3. Kebanyakan
  4. Selalu
87. Dalam 3 bulan terakhir, seberapa sering anda mengalami kesulitan menelan?
0. Tidak pernah atau jarang
  1. Kadang-kadang
  2. Sering
  3. Kebanyakan
  4. Selalu
88. Apakah anda puas dengan kunjungan anda ke dokter berhubungan dengan keluhan anda yang paling mengganggu?
1. Ya
  2. Tidak, karena dokter tidak mempedulikan keluhan saya
  3. Tidak, karena dokter tidak memberikan penjelasan cukup
  4. Tidak, karena dokter tidak melakukan pemeriksaan menyeluruh
  5. Saya tidak berobat ke dokter untuk keluhan ini
  6. Tidak, karena terapi ini tidak efektif

**BAGIAN C (Diisi oleh pewawancara)**

1. Dalam 3 bulan terakhir, apakah anda meminum obat
  - a. H<sub>2</sub>RA
    1. Ya
    2. Tidak
  - b. PPI
    1. Ya
    2. Tidak
  - c. Prokinetik
    1. Ya
    2. Tidak
  - d. Serat (e.g., Vegeta)
    1. Ya
    2. Tidak
  - e. Probiotik

- 1. Ya
- 2. Tidak
- f. Laksatif
  - 1. Ya
  - 2. Tidak
- g. Antispasmodik
  - 1. Ya
  - 2. Tidak
- h. Obat-obatan tradisional
  - 1. Ya
  - 2. Tidak
- i. Penenang dan anti depresi
  - 1. Ya
  - 2. Tidak
- 2. Apakah obat-obatan tersebut membantu menghilangkan gejala?
  - 1. Membaik
  - 2. Tidak ada perubahan
  - 3. Memburuk
  - 4. Belum berobat (Lanjutkan ke no.4)
- 3. Tandai 3 alasan ketidakpuasan anda dengan terapi sebelumnya berdasarkan peringkat (berikan nomor 1 sampai 3, no.1 adalah yang terpenting)
  - a. Tidak memperbaiki kebiasaan buang air besar
  - b. Efeknya tidak dapat ditentukan
  - c. Tidak bekerja dengan cepat
  - d. Tidak efektif menghilangkan banyak gejala
  - e. Tidak mudah digunakan
  - f. Tidak dapat menghilangkan kembung
  - g. Efek samping yang tidak menyenangkan
  - h. Biayanya tinggi
- 4. Seberapa banyak gejala di bawah ini mempengaruhi kualitas hidup anda?

|                  | 1. Tidak berpengaruh sama sekali | 2. Sedikit berpengaruh | 3. Agak berpengaruh | 4. Banyak berpengaruh | 5. Sangat berpengaruh |
|------------------|----------------------------------|------------------------|---------------------|-----------------------|-----------------------|
| a. Rasa terbakar |                                  |                        |                     |                       |                       |
| b. Sendawa       |                                  |                        |                     |                       |                       |
| c. Kembung       |                                  |                        |                     |                       |                       |
| d. Rasa penuh    |                                  |                        |                     |                       |                       |

|                                         |  |  |  |  |  |
|-----------------------------------------|--|--|--|--|--|
| e. Gejala yang berkaitan dengan makanan |  |  |  |  |  |
| f. Rasa tidak nyaman pada perut         |  |  |  |  |  |
| g. Nyeri abdomen                        |  |  |  |  |  |
| h. Sering/jarang buang air besar        |  |  |  |  |  |
| i. Buang air besar tidak lampias        |  |  |  |  |  |
| j. Padat/lembek konsistensi tinja       |  |  |  |  |  |
| k. k.Mengedan/ ingin segera (urgen) BAB |  |  |  |  |  |

5. Jika anda mencari informasi mengenai penyakit anda, sumber informasi mana yang memberikan informasi yang paling sesuai? Harap berikan peringkat 1-5, dengan no1 adalah yang paling sesuai
- Spesialis gastroenterologi
  - Dokter umum
  - Farmasi
  - Internet
  - Perawat
  - Pasien lain
  - Teman atau keluarga
  - Perkumpulan pasien
  - Majalah
  - Buku
  - Televisi
  - Koran
6. Kepada siapa saja anda telah berobat sejak anda pertama kali merasakan gejala? Anda bisa memilih lebih dari 1
- Dokter umum
  - Farmasi
  - Spesialis gastroenterologi
  - Spesialis lain (spesialis geriatri, spesialis kandungan, dsb.). Harap diperjelas spesialis apa? .....
  - Pengobatan alternatif (Pengobatan China, homeopati, dsb)
  - Perawat
  - Ini adalah konsultasi yang pertama
7. Apakah diagnosa klinisi yang merawat pasien ini? (Untuk dilihat di status pasien)
8. Jumlah tahun edukasi formal ..... tahun, SD/SMP/SMA/Diploma/S1/S2/S3

**Supplementary Table 6**

**EAR3Q**

날짜 : \_\_/\_\_/\_\_ (일/월/년)

Initials: \_\_\_\_\_

**SECTION B**

이 조사는 사람들이 때때로 가질수 있는 위, 장 증상에 관해 자세히 알아보고자 진행됩니다. 설문지 작성은 40분 가량 소요됩니다. 각 물음에 대해 당신의 증상을 정확하게 표현하는 보기에 표시해주십시오. 질문 중 해당하는 증상이 없다면 문항에 따라 답하지 않고 지시에 따라 다음 문항으로 갈 수 있습니다. 답변을 확실하게 할 수 없거나 문제에 대한 답을 기억할 수 없다면 가능한 최선의 답을 해주시면 됩니다. 누락되는 문항이 없도록 모든 문항에 답변해 주십시오.

|                                                                                                             |                                                                                                                                                                                                                                                              |                                  |
|-------------------------------------------------------------------------------------------------------------|--------------------------------------------------------------------------------------------------------------------------------------------------------------------------------------------------------------------------------------------------------------|----------------------------------|
| <p>1. 최근 3 개월 동안 목에 덩어리가 걸려있거나, 팍 찬 느낌 또는 붙어있는 느낌이 얼마나 자주 있었습니까?</p>                                        | <p>③ 전혀 없음 →→→→→→<br/>                 ① 한 달에 하루 미만<br/>                 ② 한 달에 하루<br/>                 ③ 한 달에 2-3 일<br/>                 ④ 일주일에 하루<br/>                 ⑤ 일주일에 2 일 이상<br/>                 ⑥ 매일</p>                                         | <p><b>없으면 4 번 문항으로 가십시오.</b></p> |
| <p>2. 이러한 증상이 6개월 이상 있었습니까?</p>                                                                             | <p>③ 아니오<br/>                 ① 예</p>                                                                                                                                                                                                                        |                                  |
| <p>3. 이러한 느낌은 식사 사이에 일어납니까? (식사하고 있지 않을 때)</p> <p>a. 이 느낌은 식사와 관련하여 일어납니까?</p> <p>b. 보통 이 느낌은 얼마나 심합니까?</p> | <p>③ 아니오<br/>                 ① 예</p> <p>③ 아니오<br/>                 ① 식전<br/>                 ② 식사 중<br/>                 ③ 식후</p> <p>① 매우 약함<br/>                 ② 약함<br/>                 ③ 보통<br/>                 ④ 심함<br/>                 ⑤ 매우 심함</p> |                                  |



# EAR3Q

날짜 : \_\_\_/\_\_\_/\_\_\_ (일/월/년)

Initials: \_\_\_\_\_

|                                                                                           |                                                                                                                                                                                                                                                                   |                                      |
|-------------------------------------------------------------------------------------------|-------------------------------------------------------------------------------------------------------------------------------------------------------------------------------------------------------------------------------------------------------------------|--------------------------------------|
| <p>4. 먹거나 마실 때 삼키는 것이 아릅니까?</p> <p>a. 먹거나 마실 때 삼키는 동안 통증이나 불편감이 있습니까 ?</p>                | <p>⓪ 전혀 또는 거의 없음<br/>                 ① 가끔<br/>                 ② 자주<br/>                 ③ 거의 대부분<br/>                 ④ 항상</p> <p>⓪ 전혀 또는 거의 없음<br/>                 ① 가끔<br/>                 ② 자주<br/>                 ③ 거의 대부분<br/>                 ④ 항상</p> |                                      |
| <p>5. 최근 3 개월 동안 가슴 중앙으로 통증이나 불편감이 얼마나 자주 있었습니까?<br/>                 (심장 문제와 관련이 없는)</p> | <p>⓪ 전혀 없음 →→→→→<br/>                 ① 한 달에 하루 미만<br/>                 ② 한 달에 하루<br/>                 ③ 한 달에 2-3 일<br/>                 ④ 일주일에 하루<br/>                 ⑤ 일주일에 2 일 이상<br/>                 ⑥ 매일</p>                                               | <p><b>없으면 8번 문항으로<br/>가십시오.</b></p>  |
| <p>6. 이러한 가슴 통증이 6 개월 이상 있었습니까?</p>                                                       | <p>⓪ 아니오<br/>                 ① 예</p>                                                                                                                                                                                                                             |                                      |
| <p>7. 가슴 통증이 있을 때, 타는(화끈거리는) 듯한 느낌이 있었습니까?</p>                                            | <p>⓪ 전혀 또는 거의 없음<br/>                 ① 가끔<br/>                 ② 자주<br/>                 ③ 거의 대부분<br/>                 ④ 항상</p>                                                                                                                                  |                                      |
| <p>8. 최근 3개월 동안 가슴 쓰림이 얼마나 자주 있었습니까? (가슴 안쪽으로 타는 듯한 또는 화끈 거리는 불편감 또는 통증)</p>              | <p>⓪ 전혀 없음 →→→→→<br/>                 ① 한 달에 하루 미만<br/>                 ② 한 달에 하루<br/>                 ③ 한 달에 2-3 일<br/>                 ④ 일주일에 하루<br/>                 ⑤ 일주일에 2 일 이상<br/>                 ⑥ 매일</p>                                               | <p><b>없으면 10번 문항으로<br/>가십시오.</b></p> |
| <p>9. 가슴쓰림 증상이 6개월 이상 있었습니까?</p>                                                          | <p>⓪ 아니오<br/>                 ① 예</p>                                                                                                                                                                                                                             |                                      |

# EAR3Q

날짜 : \_\_/\_\_/\_\_ (일/월/년)

Initials: \_\_\_\_\_

|                                                                               |                                                                                                                                 |                                   |
|-------------------------------------------------------------------------------|---------------------------------------------------------------------------------------------------------------------------------|-----------------------------------|
| <p>10. 최근 3개월 동안, 음식이나 음료를 삼킨 후 목에 걸리거나 가슴 안 쪽에서 느리게 넘어간 적이 얼마나 자주 있었습니까?</p> | <p>⓪ 전혀 없음 →→→→→</p> <p>① 한 달에 하루 미만</p> <p>② 한 달에 하루</p> <p>③ 한 달에 2-3 일</p> <p>④ 일주일에 하루</p> <p>⑤ 일주일에 2 일 이상</p> <p>⑥ 매일</p> | <p><i>없으면 13번 문항으로 가십시오.</i></p>  |
| <p>11. 음식이 걸리는 증상이 가슴쓰림과 관련되어 있었습니까?</p>                                      | <p>⓪ 전혀 또는 거의 없음</p> <p>① 가끔</p> <p>② 자주</p> <p>③ 거의 대부분</p> <p>④ 항상</p> <p>⑤ 대답하기 어려움</p>                                      |                                   |
| <p>12. 이러한 증상이 6 개월 이상 있었습니까?</p>                                             | <p>⓪ 아니오</p> <p>① 예</p>                                                                                                         |                                   |
| <p>13. 최근 3 개월간 1 인분 양의 식사 후 불편할 정도의 포만감을 느낀 적이 얼마나 자주 있었습니까?</p>             | <p>⓪ 전혀 없음 →→→→→</p> <p>① 한 달에 하루 미만</p> <p>② 한 달에 하루</p> <p>③ 한 달에 2-3 일</p> <p>④ 일주일에 하루</p> <p>⑤ 일주일에 2 일 이상</p> <p>⑥ 매일</p> | <p><i>없으면 15 번 문항으로 가십시오.</i></p> |
| <p>14. 식사 후 불편할 정도의 포만감이 6 개월 이상 있었습니까?</p> <p>a) 이러한 포만감이 식사와 관계됩니까?</p>     | <p>⓪ 아니오</p> <p>① 예</p><br><p>⓪ 아니오</p> <p>① 예, 많은 양의 식사 후</p> <p>② 예, 보통 양의 식사 후</p> <p>③ 예, 소량의 식사 후</p>                      |                                   |

# EAR3Q

날짜 : \_\_/\_\_/\_\_ (일/월/년)

Initials: \_\_\_\_\_

|                                                                                                                                                                                                                         |                                                                                                                                                                                           |                                                                                                |
|-------------------------------------------------------------------------------------------------------------------------------------------------------------------------------------------------------------------------|-------------------------------------------------------------------------------------------------------------------------------------------------------------------------------------------|------------------------------------------------------------------------------------------------|
| <p>b) 보통 이러한 복부 포만감이 어디에 위치합니까?</p> <p>c) 오른쪽 그림에 표시해 주십시오. 한 곳 이상의 경우에는 가장 불편한 부위 하나만을 표시하십시오.</p> <p>d) 어떤 경우 복부 포만감이 가장 호전됩니까?</p> <p>e) 복부 포만감의 심한 정도를 어떻게 표현하시겠습니까?</p> <p>f) 복부 포만감이 있으면 귀하는 화장실에 급히 가야만 합니까?</p> | <p>① 상복부<br/>② 하복부<br/>③ 배꼽주위<br/>④ 복부전체<br/>⑤ 가슴</p> <p>① 대변을 보면서<br/>② 방귀를 끼어서<br/>③ 둘다<br/>④ 없음<br/>⑤ 트립</p> <p>① 매우약함<br/>② 약함<br/>③ 중간<br/>④ 심함<br/>⑤ 매우 심함</p> <p>① 예<br/>② 아니오</p> | <p>c)</p> 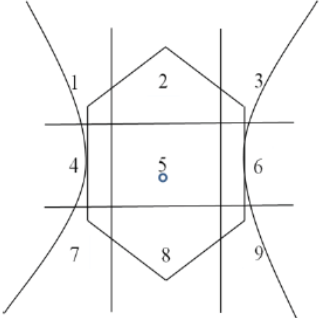 |
| <p>15. 최근 3개월동안 1인분 양의 식사를 다 먹지 못한 적이 얼마나 자주 있었습니까?</p>                                                                                                                                                                 | <p>① 전혀 없음 →→→→→</p> <p>② 한 달에 하루 미만<br/>③ 한 달에 하루<br/>④ 한 달에 2-3일<br/>⑤ 일주일에 하루<br/>⑥ 일주일에 2일 이상<br/>⑦ 매일</p>                                                                            | <p><b>없으면 17번 문항으로 가십시오.</b></p>                                                               |

# EAR3Q

날짜 : \_\_\_/\_\_\_/\_\_\_ (일/월/년)

Initials: \_\_\_\_\_

|                                                                                                                                                                                      |                                                                                                                                                                      |                                                                                                                           |
|--------------------------------------------------------------------------------------------------------------------------------------------------------------------------------------|----------------------------------------------------------------------------------------------------------------------------------------------------------------------|---------------------------------------------------------------------------------------------------------------------------|
| <p>16. 1 인분 양의 식사를 다 먹지 못하는 증상이 6 개월 이상 있었습니까?</p>                                                                                                                                   | <p>ⓐ 아니오<br/>① 예</p>                                                                                                                                                 |                                                                                                                           |
| <p>17. 지난 3 개월 동안 복부 가운데의(가슴이 아닌 배꼽 위쪽) 통증이나 쓰린(화끈거리는) 증상이 얼마나 자주 있었습니까?<br/>(오른쪽 표에 표시해 주십시오)</p> <p>a) 오른쪽 그림에 표시해 주십시오.<br/>한 곳 이상의 경우에는 가장 불편한 부위 하나만을 표시하십시오.</p> <p>b) 증상은</p> | <p>ⓐ 전혀 없음 →→→→→<br/>① 한 달에 하루 미만<br/>② 한 달에 하루<br/>③ 한 달에 2-3일<br/>④ 일주일에 하루<br/>⑤ 일주일에 2일 이상<br/>⑥ 매일</p> <p>① 통증만 있었다<br/>② 쓰린 증상만 있었다<br/>③ 통증과 쓰린 증상 모두 있었다</p> | <p>없으면 26 번 문항으로 가십시오.</p> <p>a)</p> 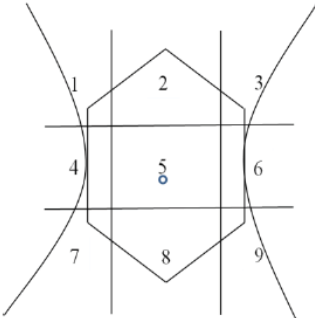 |
| <p>18. 복부 통증이나 쓰린(화끈거리는) 증상이 6 개월 이상 있었습니까?</p>                                                                                                                                      | <p>ⓐ 아니오<br/>① 예</p>                                                                                                                                                 |                                                                                                                           |
| <p>19. 복부 통증이나 쓰린(화끈거리는) 증상이 생기면 그 날 안에 완전히 없어집니까?</p>                                                                                                                               | <p>ⓐ 전혀 또는 거의 없음<br/>① 가끔<br/>② 자주<br/>③ 거의 대부분<br/>④ 항상</p>                                                                                                         |                                                                                                                           |
| <p>20. 복부 가운데의(가슴이 아닌 배꼽 위쪽) 통증이나 쓰린(화끈거리는) 증상은 보통 얼마나 심했습니까?</p>                                                                                                                    | <p>① 아주 약간<br/>② 약간<br/>③ 중간 정도<br/>④ 심함<br/>⑤ 매우 심함</p>                                                                                                             |                                                                                                                           |

# EAR3Q

날짜 : \_\_/\_\_/\_\_ (일/월/년)

Initials: \_\_\_\_\_

|                                                                                                                                                                                     |                                                                                                                                                            |  |
|-------------------------------------------------------------------------------------------------------------------------------------------------------------------------------------|------------------------------------------------------------------------------------------------------------------------------------------------------------|--|
| <p>21. 복부 통증이나 쓰린(화끈거리는) 증상이 식사와 관련이 있었습니까?</p>                                                                                                                                     | <p>① 식사와 관련 없음<br/>② 식사에 의해 악화<br/>③ 식사에 의해 완화</p>                                                                                                         |  |
| <p>22. 복부 통증이나 쓰린(화끈거리는) 증상이 제산제를 복용하면 호전되었습니까?</p>                                                                                                                                 | <p>① 전혀 또는 거의 없음<br/>② 가끔<br/>③ 자주<br/>④ 거의 대부분<br/>⑤ 항상</p>                                                                                               |  |
| <p>23. 복부 통증이나 쓰린(화끈거리는) 증상은 보통 배변 또는 방귀가 나온 후 호전되거나 없어집니까?</p> <p>a) 복부 통증이나 쓰린(화끈거리는) 증상은 보통 배변 또는 방귀가 나온 후 호전됩니까?</p> <p>b) 복부 통증이나 쓰린(화끈거리는) 증상은 보통 배변 또는 방귀가 나온 후 더 나빠집니까?</p> | <p>① 전혀 또는 거의 없음<br/>② 가끔<br/>③ 자주<br/>④ 거의 대부분<br/>⑤ 항상</p> <p>① 아니오<br/>② 배변후<br/>③ 방귀가 나온 후<br/>④ 모두</p> <p>① 아니오<br/>② 배변후<br/>③ 방귀가 나온 후<br/>④ 모두</p> |  |
| <p>24. 복부 통증이나 쓰린(화끈거리는) 증상이 시작될 때 보통 배변 횟수의 변화가 있었습니까? (증가 또는 감소)</p>                                                                                                              | <p>① 전혀 또는 거의 없음<br/>② 가끔<br/>③ 자주<br/>④ 거의 대부분<br/>⑤ 항상</p>                                                                                               |  |
| <p>25. 복부 통증이나 쓰린(화끈거리는) 증상이 시작될 때 보통 변이 물러지거나 딱딱해졌습니까?</p>                                                                                                                         | <p>① 전혀 또는 거의 없음<br/>② 가끔<br/>③ 자주<br/>④ 거의 대부분<br/>⑤ 항상</p>                                                                                               |  |

# EAR3Q

날짜 : \_\_/\_\_/\_\_ (일/월/년)

Initials: \_\_\_\_\_

|                                                   |                                                                                                                                                                                                                                                                           |                                   |
|---------------------------------------------------|---------------------------------------------------------------------------------------------------------------------------------------------------------------------------------------------------------------------------------------------------------------------------|-----------------------------------|
| <p>26. 최근 3개월 동안 메스꺼움(불편할 정도로)이 얼마나 자주 있었습니까?</p> | <p> <input type="radio"/> 전혀 없음 →→→→→<br/> <input type="radio"/> 한 달에 하루 미만<br/> <input type="radio"/> 한 달에 하루<br/> <input type="radio"/> 한 달에 2-3 일<br/> <input type="radio"/> 일주일에 하루<br/> <input type="radio"/> 일주일에 2 일 이상<br/> <input type="radio"/> 매일         </p> | <p><i>없으면 28 번 문항으로 가십시오.</i></p> |
| <p>27. 이러한 메스꺼움이 6개월 이전부터 시작되었습니까?</p>            | <p> <input type="radio"/> 아니오<br/> <input type="radio"/> 예         </p>                                                                                                                                                                                                   |                                   |
| <p>28. 최근 3개월 동안 구토를 얼마나 자주 하였습니까?</p>            | <p> <input type="radio"/> 전혀 없음 →→→→→<br/> <input type="radio"/> 한 달에 하루 미만<br/> <input type="radio"/> 한 달에 하루<br/> <input type="radio"/> 한 달에 2-3 일<br/> <input type="radio"/> 일주일에 하루<br/> <input type="radio"/> 일주일에 2 일 이상<br/> <input type="radio"/> 매일         </p> | <p><i>없으면 33번 문항으로 가십시오.</i></p>  |
| <p>29. 이러한 구토를 6개월 이상(6개월 전부터) 하였습니까?</p>         | <p> <input type="radio"/> 아니오<br/> <input type="radio"/> 예         </p>                                                                                                                                                                                                   |                                   |
| <p>30. 귀하 자신이 자의적으로 구토한 적이 있었습니까?</p>             | <p> <input type="radio"/> 전혀 또는 거의 없음<br/> <input type="radio"/> 가끔<br/> <input type="radio"/> 자주<br/> <input type="radio"/> 거의 대부분<br/> <input type="radio"/> 항상         </p>                                                                                            |                                   |
| <p>31. 최근 일 년간 지속기간이 일 주 이내인 주기적인 구토가 있었습니까?</p>  | <p> <input type="radio"/> 전혀 또는 거의 없음 →→→→→<br/> <input type="radio"/> 가끔<br/> <input type="radio"/> 자주<br/> <input type="radio"/> 거의 대부분<br/> <input type="radio"/> 항상         </p>                                                                                      | <p><i>없으면 33번 문항으로 가십시오</i></p>   |
| <p>32. 최근 일 년간 적어도 3회 이상 주기적인 구토를 하였습니까?</p>      | <p> <input type="radio"/> 아니오<br/> <input type="radio"/> 예         </p>                                                                                                                                                                                                   |                                   |

# EAR3Q

날짜 : \_\_\_/\_\_\_/\_\_\_ (일/월/년)

Initials: \_\_\_\_\_

|                                                                    |                                                                                                                                                                                                                     |                                  |
|--------------------------------------------------------------------|---------------------------------------------------------------------------------------------------------------------------------------------------------------------------------------------------------------------|----------------------------------|
| <p>33. 최근 3개월 동안 음식물이 입으로 다시 넘어온 적(되새김: 구토와 다름)이 얼마나 자주 있었습니까?</p> | <p>① 전혀 없음 →→→→→<br/>                 ① 한 달에 하루 미만<br/>                 ② 한 달에 하루<br/>                 ③ 한 달에 2-3 일<br/>                 ④ 일주일에 하루<br/>                 ⑤ 일주일에 2 일 이상<br/>                 ⑥ 매일</p> | <p><i>없으면 39번 문항으로 가십시오.</i></p> |
| <p>34. 이러한 되새김 증상(음식물이 입으로 다시 넘어옴)이 6개월 이전부터 있었습니까?</p>            | <p>① 아니오<br/>                 ② 예</p>                                                                                                                                                                               |                                  |
| <p>35. 입으로 넘어온 음식물을 보통 입안에 잠시 머금었다가 삼키거나 뱉어냅니까?</p>                | <p>① 전혀 또는 거의 없음<br/>                 ② 가끔<br/>                 ③ 자주<br/>                 ④ 거의 대부분<br/>                 ⑤ 항상</p>                                                                                    |                                  |
| <p>36. 음식물이 입으로 넘어오기 전에 헛구역질이 있습니까?</p>                            | <p>① 전혀 또는 거의 없음<br/>                 ② 가끔<br/>                 ③ 자주<br/>                 ④ 거의 대부분<br/>                 ⑤ 항상</p>                                                                                    |                                  |
| <p>37. 음식이 입으로 넘어올 때 얼마나 자주 토하거나 곧 토할 것 같은 느낌이 듭니까?</p>            | <p>① 전혀 또는 거의 없음<br/>                 ② 가끔<br/>                 ③ 자주<br/>                 ④ 거의 대부분<br/>                 ⑤ 항상</p>                                                                                    |                                  |
| <p>38. 넘어오는 음식이 시큼해지면 더 이상 음식이 입으로 넘어오지 않습니까?</p>                  | <p>① 전혀 또는 거의 없음<br/>                 ② 가끔<br/>                 ③ 자주<br/>                 ④ 거의 대부분<br/>                 ⑤ 항상</p>                                                                                    |                                  |

# EAR3Q

날짜 : \_\_\_/\_\_\_/\_\_\_ (일/월/년)

Initials: \_\_\_\_\_

|                                                                                                                                                                                                                           |                                                                                                                                                                                                                                                                                                                                                                                                                                                                                                                                                                                    |                                  |
|---------------------------------------------------------------------------------------------------------------------------------------------------------------------------------------------------------------------------|------------------------------------------------------------------------------------------------------------------------------------------------------------------------------------------------------------------------------------------------------------------------------------------------------------------------------------------------------------------------------------------------------------------------------------------------------------------------------------------------------------------------------------------------------------------------------------|----------------------------------|
| <p>39. 최근 3개월 동안 트림(불편할 정도의)이 얼마나 자주 있었습니까?</p>                                                                                                                                                                           | <p> <input type="radio"/> 전혀 없음      →→→→→<br/> <input type="radio"/> 한 달에 하루 미만<br/> <input type="radio"/> 한 달에 하루<br/> <input type="radio"/> 한 달에 2-3 일<br/> <input type="radio"/> 일주일에 하루<br/> <input type="radio"/> 일주일에 2 일 이상<br/> <input type="radio"/> 매일         </p>                                                                                                                                                                                                                                                                                                     | <p><b>없으면 41번 문항으로 가십시오.</b></p> |
| <p>40. 이러한 트림(불편할 정도의)이 6 개월 이전부터 시작되었습니까?</p> <p>a) 트림은 식사 전에 일어납니까?</p> <p>b) 트림은 식사 동안에 일어납니까?</p> <p>c) 트림은 식사 후에 일어납니까?</p> <p>d) 트림은 식사와 관계 없이 일어납니까?</p> <p>e) 보통 트림은 얼마나 심합니까?</p> <p>f) 이러한 트림은 어느 경우 호전됩니까?</p> | <p> <input type="radio"/> 아니오<br/> <input type="radio"/> 예         </p> <p> <input type="radio"/> 매우약함<br/> <input type="radio"/> 약함<br/> <input type="radio"/> 중간<br/> <input type="radio"/> 심함<br/> <input type="radio"/> 매우심함         </p> <p> <input type="radio"/> 배변으로<br/> <input type="radio"/> 방귀 낀 후<br/> <input type="radio"/> 먹어서         </p> |                                  |



# EAR3Q

날짜 : \_\_\_/\_\_\_/\_\_\_ (일/월/년)

Initials: \_\_\_\_\_

|                                                                                                                    |                                                                                                                                         |                                                                                                                          |
|--------------------------------------------------------------------------------------------------------------------|-----------------------------------------------------------------------------------------------------------------------------------------|--------------------------------------------------------------------------------------------------------------------------|
| <p>g) 트림은 다음 중 어떤 증상과 동시에 일어납니까?</p> <p>h) 귀하의 트림은 다음 중 어떤 경우 호전 됩니까?</p>                                          | <p>① 팽만감<br/>② 복통<br/>③ 가슴쓰림<br/>④ 음식의 입으로의 역류<br/>⑤ 액체의 입으로의 역류</p> <p>① 식사<br/>② 방귀뽀<br/>③ 배변후<br/>④ 재산제 혹은 산분비 억제제<br/>⑤ 해당사항 없음</p> |                                                                                                                          |
| <p>41. 최근 3개월 동안 복부 불편감이나 통증이 얼마나 자주 있었습니까?</p> <p>a) 오른쪽 그림에 표시해 주십시오.<br/>한 곳 이상의 경우에는 가장 불편한 부위 하나만을 표시하십시오</p> | <p>① 전혀 없음 →→→→→<br/>① 한 달에 하루 미만<br/>② 한 달에 하루<br/>③ 한 달에 2-3 일<br/>④ 일주일에 하루<br/>⑤ 일주일에 2 일 이상<br/>⑥ 매일</p>                           | <p>없으면 52번 문항으로 가십시오</p> <p>a)</p> 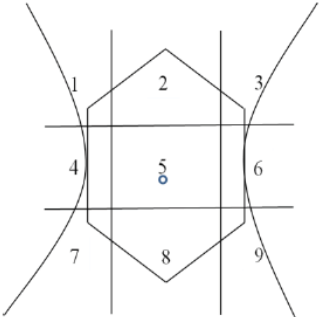 |
| <p>42. 귀하는 통증만 있습니까?<br/>(불편함 또는 불편함과 통증이 같이 있는 것이 아님)</p> <p>a) 다음 중 어느 증상입니까?</p>                                | <p>① 전혀 또는 거의 없음<br/>① 가끔<br/>② 자주<br/>③ 거의 대부분<br/>④ 항상</p> <p>① 통증만<br/>② 불편함만</p>                                                    |                                                                                                                          |

# EAR3Q

날짜 : \_\_/\_\_/\_\_ (일/월/년)

Initials: \_\_\_\_\_

|                                                                                       |                                                                                                                                                                                                                                                                                                                    |  |
|---------------------------------------------------------------------------------------|--------------------------------------------------------------------------------------------------------------------------------------------------------------------------------------------------------------------------------------------------------------------------------------------------------------------|--|
|                                                                                       | ③ 통증과 불편함                                                                                                                                                                                                                                                                                                          |  |
| 43. (여성만 해당) 복부 통증이나 불편감이 오직 생리기간에만 있고 다른 때는 없었습니까?                                   | <input type="radio"/> 아니오<br><input type="radio"/> 예<br><input type="radio"/> 갱년기이거나 남성이므로 답할 수 없음                                                                                                                                                                                                                 |  |
| 44. 복통이 있을 때 일상생활에 지장을 받은 적이 얼마나 자주 있었습니까? (직장일, 가사일, 사회 활동 등)                        | <input type="radio"/> 전혀 또는 거의 없음<br><input type="radio"/> 가끔<br><input type="radio"/> 자주<br><input type="radio"/> 거의 대부분<br><input type="radio"/> 항상                                                                                                                                                              |  |
| 45. 이러한 복부 통증이나 불편감이 6개월 이상 있었습니까?                                                    | <input type="radio"/> 아니오<br><input type="radio"/> 예                                                                                                                                                                                                                                                               |  |
| 46. 이러한 불편감이나 통증이 배변 후 얼마나 자주 호전되거나 없어집니까?<br><br>a) 이러한 불편감이나 통증이 배변 후 얼마나 자주 악화됩니까? | <input type="radio"/> 전혀 또는 거의 없음<br><input type="radio"/> 가끔<br><input type="radio"/> 자주<br><input type="radio"/> 거의 대부분<br><input type="radio"/> 항상<br><br><input type="radio"/> 전혀 또는 거의 없음<br><input type="radio"/> 가끔<br><input type="radio"/> 자주<br><input type="radio"/> 거의 대부분<br><input type="radio"/> 항상 |  |
| 47. 복부 통증이나 불편감이 시작되면서, 배변 횟수가 더 많아졌습니까?                                              | <input type="radio"/> 전혀 또는 거의 없음<br><input type="radio"/> 가끔<br><input type="radio"/> 자주<br><input type="radio"/> 거의 대부분<br><input type="radio"/> 항상                                                                                                                                                              |  |
| 48. 복부 통증이나 불편감이 시작되면서, 배변 횟수가 더 줄었습니까?                                               | <input type="radio"/> 전혀 또는 거의 없음<br><input type="radio"/> 가끔<br><input type="radio"/> 자주<br><input type="radio"/> 거의 대부분<br><input type="radio"/> 항상                                                                                                                                                              |  |

# EAR3Q

날짜 : \_\_/\_\_/\_\_ (일/월/년)

Initials: \_\_\_\_\_

|                                                                                                |                                                                             |  |
|------------------------------------------------------------------------------------------------|-----------------------------------------------------------------------------|--|
| <p>49. 복부 통증이나 불편감이 시작되면서, 무른 대변을 보셨습니까?</p>                                                   | <p>⓪ 전혀 또는 거의 없음<br/>① 가끔<br/>② 자주<br/>③ 거의 대부분<br/>④ 항상</p>                |  |
| <p>50. 복부 통증이나 불편감이 시작되면서, 굳은(단단한) 대변을 얼마나 자주 보셨습니까?</p>                                       | <p>⓪ 전혀 또는 거의 없음<br/>① 가끔<br/>② 자주<br/>③ 거의 대부분<br/>④ 항상</p>                |  |
| <p>51. 움직이거나 자세를 바꾸면 호전되는 통증이나 불편감이 얼마나 자주 있었습니까?<br/><br/>* 문항 52번으로 가기 전에 5분간 휴식을 취하십시오.</p> | <p>⓪ 전혀 또는 거의 없음<br/>① 가끔<br/>② 자주<br/>③ 거의 대부분<br/>④ 항상</p>                |  |
| <p>52. 최근 3개월 동안 일주일에 3회 미만(0-2회)으로 배변한 경우가 얼마나 자주 있었습니까??</p>                                 | <p>⓪ 전혀 또는 거의 없음<br/>① 가끔<br/>② 자주<br/>③ 거의 대부분<br/>④ 항상<br/>⑤ 기억이 잘 안남</p> |  |
| <p>53. 최근 3개월 동안 굳거나 덩어리진 변을 본 경우가 얼마나 자주 보았습니까?</p>                                           | <p>⓪ 전혀 또는 거의 없음<br/>① 가끔<br/>② 자주<br/>③ 거의 대부분<br/>④ 항상</p>                |  |
| <p>54. 최근 3개월 동안 대변을 보기 위해 과도하게 힘을 준 적이 얼마나 자주 있었습니까?</p>                                      | <p>⓪ 전혀 또는 거의 없음<br/>① 가끔<br/>② 자주<br/>③ 거의 대부분<br/>④ 항상</p>                |  |
| <p>55. 최근 3개월 동안 배변 후 잔변감을 얼마나 자주 느꼈습니까?</p>                                                   | <p>⓪ 전혀 또는 거의 없음<br/>① 가끔<br/>② 자주<br/>③ 거의 대부분<br/>④ 항상</p>                |  |

# EAR3Q

날짜 : \_\_/\_\_/\_\_ (일/월/년)

Initials: \_\_\_\_\_

|                                                                                                                                                                                                                                                                           |                                                                                                                                                                                                                                                                                                                                                                            |  |
|---------------------------------------------------------------------------------------------------------------------------------------------------------------------------------------------------------------------------------------------------------------------------|----------------------------------------------------------------------------------------------------------------------------------------------------------------------------------------------------------------------------------------------------------------------------------------------------------------------------------------------------------------------------|--|
| <p>56. 최근 3개월 동안 배변할 때 변이 나오지 않는(대변이 막히는 것 같은) 느낌이 얼마나 자주 있었습니까?</p> <p>a) 대변을 보기 어려운 적이 있었었다면 그 이유는 대변이?</p> <p>b) 대변을 어렵게 본 적이 있었다면 그 이유는</p>                                                                                                                           | <p>⓪ 전혀 또는 거의 없음<br/>                 ① 가끔<br/>                 ② 자주<br/>                 ③ 거의 대부분<br/>                 ④ 항상</p> <p>① 너무 커서<br/>                 ② 너무 얇아서<br/>                 ③ 너무 딱딱하여<br/>                 ④ 너무 건조해서<br/>                 ⑤ 해당사항 없음</p> <p>① 다급한 변의가 없음<br/>                 ② 밀어내는 힘이 약해서<br/>                 ③ 밀어낼 수 있었지만 걸리게 되어</p> |  |
| <p>57. 최근 3개월 동안 완전히 배변하기 위해 손으로 항문 주위를 누르거나 대변을 제거한 적이 얼마나 자주 있었습니까?</p> <p>a) 최근 3개월 동안 대변을 제거하기 위해 손가락을 넣은 적이 있습니까?</p> <p>b) 최근 3개월 동안 대변을 제거하기 위해 물로 세척한 적이 있습니까?</p> <p>c) 최근 3개월 동안 대변을 제거하기 위해 좌약을 넣은 적이 있습니까?</p> <p>d) 최근 3개월 동안 대변을 제거하기 위해 관장을 한 적이 있습니까?</p> | <p>⓪ 전혀 또는 거의 없음<br/>                 ① 가끔<br/>                 ② 자주<br/>                 ③ 거의 대부분<br/>                 ④ 항상</p> <p>⓪ 아니오<br/>                 ① 예</p> <p>⓪ 아니오<br/>                 ① 예</p> <p>⓪ 아니오<br/>                 ① 예</p> <p>⓪ 아니오<br/>                 ① 예</p>                                                                                   |  |

# EAR3Q

날짜 : \_\_\_/\_\_\_/\_\_\_ (일/월/년)

Initials: \_\_\_\_\_

|                                                                                                                                                |                                                                                                                                                                                                |                                     |
|------------------------------------------------------------------------------------------------------------------------------------------------|------------------------------------------------------------------------------------------------------------------------------------------------------------------------------------------------|-------------------------------------|
| <p>58. 최근 3개월 동안 배변시에 대변이 나오도록 항문 괄약근을 이완시키는데 어려움이 얼마나 자주 있었습니까?</p>                                                                           | <p>ⓐ 전혀 또는 거의 없음<br/>                 ① 가끔<br/>                 ② 자주<br/>                 ③ 거의 대부분<br/>                 ④ 항상</p>                                                               |                                     |
| <p>59. 위의 52-58 문항에 제시된 변비 증상이 6개월 이전에 생겼습니까?</p>                                                                                              | <p>ⓐ 아니오<br/>                 ① 예</p>                                                                                                                                                          |                                     |
| <p>60. 최근 3개월 동안 하루에 4회 이상 배변한 경우가 얼마나 자주 있었습니까?</p>                                                                                           | <p>ⓐ 전혀 또는 거의 없음<br/>                 ① 가끔<br/>                 ② 자주<br/>                 ③ 거의 대부분<br/>                 ④ 항상<br/>                 ⑤ 기억이 잘 안남</p>                               |                                     |
| <p>61. 최근 3개월 동안 무른 변을 보거나 물설사를 한 경우가 얼마나 자주 있었습니까?</p>                                                                                        | <p>ⓐ 전혀 또는 거의 없음 →→→→<br/>                 ① 가끔<br/>                 ② 자주<br/>                 ③ 거의 대부분<br/>                 ④ 항상</p>                                                          | <p><i>없으면 63번 문항으로<br/>가십시오</i></p> |
| <p>62. 최근 3개월 동안 대변 횟수 중 적어도 네 번 중 세 번 이상(3/4 이상)에서 무른 변이나 죽 또는 물설사였습니까?</p> <p>a) 당신의 배변 습관이 어떠하다고 느끼십니까?</p> <p>b) 일주일에 평균 배변 횟수는 얼마입니까?</p> | <p>ⓐ 아니오<br/>                 ① 예<br/>                 ② 답하기 어려움</p> <p>① 변비<br/>                 ② 설사<br/>                 ③ 가끔 변비, 가끔 설사<br/>                 ④ 해당사항 없음</p> <p>_____ 회/주</p> |                                     |

# EAR3Q

날짜 : \_\_/\_\_/\_\_ (일/월/년)

Initials: \_\_\_\_\_

|                                                                                                                                                                                                                                                                                                                 |                                                                                                                                                      |                                                                                                                                                                                                                                                                                                                                                                                                                                                                                                                                                                                                                                                                                                                                                                                                                                                             |
|-----------------------------------------------------------------------------------------------------------------------------------------------------------------------------------------------------------------------------------------------------------------------------------------------------------------|------------------------------------------------------------------------------------------------------------------------------------------------------|-------------------------------------------------------------------------------------------------------------------------------------------------------------------------------------------------------------------------------------------------------------------------------------------------------------------------------------------------------------------------------------------------------------------------------------------------------------------------------------------------------------------------------------------------------------------------------------------------------------------------------------------------------------------------------------------------------------------------------------------------------------------------------------------------------------------------------------------------------------|
| <p>*c) 귀하가 좋은 상태일 때 보는 변의 형태를 그림에서 골라 표시하십시오.</p> <p>*d) 귀하가 변비일 때 보는 변의 형태를 그림에서 골라 표시하십시오.</p> <p>*e) 귀하가 설사할 때 보는 변의 형태를 그림에서 골라 표시하십시오.</p> <p>*f) 귀하가 평소 가장 많이 보는 대변의 형태를 그림에서 골라 표시하십시오.</p> <p>*g) 귀하가 좋지 않다고 느낄 때 대변의 형태를 그림에서 골라 표시하십시오.</p> <p>* 오른쪽 브리스톨 대변 형태 도표(BSS)를 참고하여 빈칸에 적절한 숫자를 기입하십시오.</p> | <p>BSS no. _____</p>                        | <p>Bristol Stool Scale Form (BSS)</p> <p>1  분리된 단단한 덩어리, 토끼 똥 같은 대변</p> <p>2  덩어리가 뭉친 소시지 모양 대변</p> <p>3  표면이 갈라진 소시지 모양 대변</p> <p>4  매끈하고 부드러운 소시지 또는 뱀 모양 대변</p> <p>5  뚜렷한 모서리를 가지는 부드러운 방울 모양 대변</p> <p>6  잘 풀어지고 곤죽 같은 대변</p> <p>7  건더기가 없는 물변</p> |
| <p>63. 최근 3 개월 동안 배변을 위해 급히 화장실에 가야 했던 적이 얼마나 자주 있었습니까?</p> <p>a) 언제 이것이 일어납니까?</p>                                                                                                                                                                                                                             | <p>① 전혀 또는 거의 없음</p> <p>① 가끔</p> <p>② 자주</p> <p>③ 거의 대부분</p> <p>④ 항상</p> <p>① 식사후</p> <p>② 배부를 때</p> <p>③ 명치끝 통증이 있을 때</p> <p>④ 불안하거나 스트레스를 받을 때</p> |                                                                                                                                                                                                                                                                                                                                                                                                                                                                                                                                                                                                                                                                                                                                                                                                                                                             |

# EAR3Q

날짜 : \_\_\_/\_\_\_/\_\_\_ (일/월/년)

Initials: \_\_\_\_\_

|                                                                                                                                                       |                                                                                                                                                        |                                           |
|-------------------------------------------------------------------------------------------------------------------------------------------------------|--------------------------------------------------------------------------------------------------------------------------------------------------------|-------------------------------------------|
| <p>b) 심한 정도를 어떻게 표현하시겠습니까?</p>                                                                                                                        | <p>① 아주 약간<br/>② 약간<br/>③ 중간 정도<br/>④ 심함<br/>⑤ 매우 심함</p>                                                                                               |                                           |
| <p>64. 잦은 무른 변이나 물설사를 보게 된 것이 6개월 이전부터 시작되었습니까?</p>                                                                                                   | <p>① 아니오<br/>② 예</p>                                                                                                                                   |                                           |
| <p>65. 최근 3개월 동안 점액변을 본 적이 얼마나 자주 있습니까?</p>                                                                                                           | <p>① 전혀 또는 거의 없음<br/>② 가끔<br/>③ 자주<br/>④ 거의 대부분<br/>⑤ 항상</p>                                                                                           |                                           |
| <p>66. 최근 3개월 동안 팽만감이나 팽창감이 얼마나 자주 있었습니까?</p> <p>a) 팽만감이나 팽창감을 오른쪽 표에 표시해 주십시오. 위치가 한군데 이상이면 가장 심한 위치에 표시하십시오.</p> <p>b) 팽만감이나 팽창감이 배변으로 호전되었습니까?</p> | <p>① 전혀 없음                      →→→→→→<br/>② 한 달에 하루 미만<br/>③ 한 달에 하루<br/>④ 한 달에 2-3일<br/>⑤ 일주일에 하루<br/>⑥ 일주일에 2일 이상<br/>⑦ 매일</p> <p>① 아니오<br/>② 예</p> | <p><b>없으면 68번 문항으로 가십시오</b></p> <p>a)</p> |

# EAR3Q

날짜 : \_\_/\_\_/\_\_ (일/월/년)

Initials: \_\_\_\_\_

|                                                                                                               |                                                                                                                                     |                                           |
|---------------------------------------------------------------------------------------------------------------|-------------------------------------------------------------------------------------------------------------------------------------|-------------------------------------------|
| <p>c) 팽만감이나 팽창감이 배변 횟수의 변화 (자주 보거나 덜 보는)와 관련되었습니까?</p> <p>d) 팽만감이나 팽창감이 대변 형태의 변화 (딱딱해지거나 무른 변)와 관련되었습니까?</p> | <p>⓪ 아니오<br/>① 예</p> <p>⓪ 아니오<br/>① 예</p>                                                                                           |                                           |
| <p>67. 6개월 이전부터 팽만감이나 팽창감이 있었습니까?</p>                                                                         | <p>⓪ 아니오<br/>① 예</p>                                                                                                                |                                           |
| <p>68. 최근 6개월 동안 상복부 가운데나 우측(우상복부)에 끊임없이 계속되는 통증이 얼마나 자주 있었습니까?</p> <p>a) 위치가 한군데 이상이면 가장 심한 위치에 표시하십시오.</p>  | <p>⓪ 전혀 없음                      →→→→→</p> <p>① 한 달에 하루 미만<br/>② 한 달에 하루<br/>③ 한 달에 2-3일<br/>④ 일주일에 하루<br/>⑤ 일주일에 2일 이상<br/>⑥ 매일</p> | <p><i>없으면 75번 문항으로 가십시오</i></p> <p>a)</p> |
| <p>69. 이러한 상복부 또는 우상복부 통증이 30분 이상 계속되었습니까?</p>                                                                | <p>⓪ 전혀 또는 거의 없음<br/>① 가끔<br/>② 자주<br/>③ 거의 대부분<br/>④ 항상</p>                                                                        |                                           |



# EAR3Q

날짜 : \_\_/\_\_/\_\_ (일/월/년)

Initials: \_\_\_\_\_

|                                                                        |                                                              |                                     |
|------------------------------------------------------------------------|--------------------------------------------------------------|-------------------------------------|
| <p>70. 상복부 또는 우상복부 통증은 지속적이며 심각할 정도로 심해집니까?</p>                        | <p>⓪ 전혀 또는 거의 없음<br/>① 가끔<br/>② 자주<br/>③ 거의 대부분<br/>④ 항상</p> |                                     |
| <p>71. 증상과 증상 사이 이러한 통증은 완전히 사라집니까?</p>                                | <p>⓪ 전혀 또는 거의 없음<br/>① 가끔<br/>② 자주<br/>③ 거의 대부분<br/>④ 항상</p> |                                     |
| <p>72. 이러한 통증 때문에 귀하가 일상활동을 할 수 없었거나, 급하게 의사를 찾거나 응급실로 간 적이 있었습니까?</p> | <p>⓪ 전혀 또는 거의 없음<br/>① 가끔<br/>② 자주<br/>③ 거의 대부분<br/>④ 항상</p> |                                     |
| <p>73. 이전에 담낭절제술을 받았습니까?</p>                                           | <p>⓪ 아니오                    →→→→→<br/>① 예</p>                | <p><i>없으면 75번 문항으로<br/>가십시오</i></p> |
| <p>74. 담낭절제술을 받은 후에 이러한 통증이 얼마나 자주 있었습니까?</p>                          | <p>⓪ 전혀 또는 거의 없음<br/>① 가끔<br/>② 자주<br/>③ 거의 대부분<br/>④ 항상</p> |                                     |
| <p>75. 방귀 때문에 얼마나 당신은 불편합니까?</p>                                       | <p>⓪ 전혀 또는 거의 없음<br/>① 가끔<br/>② 자주<br/>③ 거의 대부분<br/>④ 항상</p> |                                     |
| <p>76. 방귀를 참기 어렵습니까?</p>                                               | <p>⓪ 전혀 또는 거의 없음<br/>① 가끔<br/>② 자주<br/>③ 거의 대부분<br/>④ 항상</p> |                                     |

# EAR3Q

날짜 : \_\_\_/\_\_\_/\_\_\_ (일/월/년)

Initials: \_\_\_\_\_

|                                                                      |                                                                                                                                                                                                                   |                                 |
|----------------------------------------------------------------------|-------------------------------------------------------------------------------------------------------------------------------------------------------------------------------------------------------------------|---------------------------------|
| <p>77. 최근 3개월 동안 무르거나 딱딱한 변을 실수로 지린 적이 얼마나 자주 있었습니까?</p>             | <p>⓪ 전혀 없음 →→→→→<br/>                 ① 한 달에 하루 미만<br/>                 ② 한 달에 하루<br/>                 ③ 한 달에 2-3일<br/>                 ④ 일주일에 하루<br/>                 ⑤ 일주일에 2일 이상<br/>                 ⑥ 매일</p> | <p><i>없으면 80번 문항으로 가십시오</i></p> |
| <p>78. 최근 3개월 동안 변실금이 있었을 때 그 양은 어느 정도였습니까?</p>                      | <p>① 적은 양 (물을 정도)<br/>                 ② 중간 정도 (물은 것보다 많고 배변 때보다 적은)<br/>                 ③ 많은 양(배변한 만큼)</p>                                                                                                      |                                 |
| <p>79. 지난 해 변실금이 일어났을 때 지린 변의 형태는 어떠했습니까?</p>                        | <p>① 물/점액만<br/>                 ② 대변만<br/>                 ③ 물/점액/대변 모두</p>                                                                                                                                       |                                 |
| <p>80. 최근 3개월 동안 배변중인 경우를 제외하고 항문이나 직장의 통증 또는 압박감이 얼마나 자주 있었습니까?</p> | <p>⓪ 전혀 없음 →→→→→<br/>                 ① 한 달에 하루 미만<br/>                 ② 한 달에 하루<br/>                 ③ 한 달에 2-3일<br/>                 ④ 일주일에 하루<br/>                 ⑤ 일주일에 2일 이상<br/>                 ⑥ 매일</p> | <p><i>없으면 84번 문항으로 가십시오</i></p> |
| <p>81. 이러한 통증, 압박감은 얼마나 오래갑니까?</p>                                   | <p>① 수초부터 20분까지 그리고 완전히 사라진다.<br/>                 ② 20분 이상 수일 이상도 지속된다</p>                                                                                                                                       |                                 |
| <p>82. 항문과 직장의 통증은 생겼다가 같은 날에 완전히 사라집니까?</p>                         | <p>⓪ 아니오<br/>                 ① 예</p>                                                                                                                                                                             |                                 |
| <p>83. 항문관이나 직장의 통증, 압박감이 6개월 이전부터 시작되었습니까?</p>                      | <p>⓪ 아니오<br/>                 ① 예</p>                                                                                                                                                                             |                                 |

# EAR3Q

날짜 : \_\_/\_\_/\_\_ (일/월/년)

Initials: \_\_\_\_\_

|                                                                             |                                                                                                                                                                                                             |  |
|-----------------------------------------------------------------------------|-------------------------------------------------------------------------------------------------------------------------------------------------------------------------------------------------------------|--|
| <p>84. 최근 3개월 동안<br/>선목소리가 지속되거나 악화된<br/>적이 얼마나 자주 있었습니까?</p>               | <p>⓪ 전혀 또는 거의 없음<br/>① 가끔<br/>② 자주<br/>③ 거의 대부분<br/>④ 항상</p>                                                                                                                                                |  |
| <p>85. 최근 3개월 동안 목과<br/>인후 통증이 지속되거나<br/>악화된 적이 얼마나 자주<br/>있었습니까?</p>       | <p>⓪ 전혀 또는 거의 없음<br/>① 가끔<br/>② 자주<br/>③ 거의 대부분<br/>④ 항상</p>                                                                                                                                                |  |
| <p>86. 최근 3개월 동안 운동시<br/>발생하는 흉통이나 심장 문제와<br/>관련된 흉통이 얼마나 자주<br/>있었습니까?</p> | <p>⓪ 전혀 또는 거의 없음<br/>① 가끔<br/>② 자주<br/>③ 거의 대부분<br/>④ 항상</p>                                                                                                                                                |  |
| <p>87. 최근 3개월 동안<br/>연하곤란(삼키기 어려움)이<br/>얼마나 자주 있었습니까?</p>                   | <p>⓪ 전혀 또는 거의 없음<br/>① 가끔<br/>② 자주<br/>③ 거의 대부분<br/>④ 항상</p>                                                                                                                                                |  |
| <p>88. 당신은 이 문제로 이전에<br/>의사를 방문한 것을<br/>만족합니까?</p>                          | <p>① 예<br/>② 아니오, 왜냐하면 의사가 내<br/>불만을 무시하였으므로<br/>③ 아니오, 왜냐하면 의사가 충분한<br/>설명을 하지 않았으므로<br/>④ 아니오, 왜냐하면 의사가 충분한<br/>조사를 하지 않았으므로<br/>⑤ 아니오, 나는 이문제로 의사를<br/>방문한 적이 없습니다.<br/>⑥ 아니오, 왜냐하면 치료 효과가<br/>없었으므로</p> |  |

วันที่: \_\_\_\_/\_\_\_\_/\_\_\_\_  
                   วัน          เดือน          ปี

รหัส: \_\_\_\_\_

ส่วนที่ 2.

จุดประสงค์ของแบบสอบถามต่อไปนี้เป็นเพื่อศึกษาเกี่ยวกับปัญหาสุขภาพทางด้านกระเพาะอาหารและลำไส้ทางคนอาจมีปัญหา

ด

เป็นครั้งคราว คำถามทั้งหมดจะใช้เวลาประมาณ 40 นาที ในการตอบคำถามกรณ "วงกลม" หมายเลขหน้าข้อความตรงกับอาการที่ท่านมีอาการ ทานอาจจะพบว่าท่านมีอาการอะไรเลยที่อยู่ในคำถามต่อไป ถ้าเป็นเช่นนั้น แบบสอบถามจะแจ้งให้ท่านขามการตอบในบางขอที่ท่านไม่จำเป็นต้องตอบ ถ้าท่านไม่มั่นใจว่าจะตอบอย่างไร หรือท่านไม่สามารถตอบเนื่องจากจำไม่ได้ จงพยายามตอบตามที่ท่านคิดว่าเป็นคำตอบที่ดีที่สุด ขณะตอบแบบสอบถามพยายามระมัดระวังและตรวจสอบว่าท่านได้ตอบคำถามครบทุกคำถามแล้ว

|                                                                                                                                      |                                                                                                                                                                                                                     |                                                                                                                    |
|--------------------------------------------------------------------------------------------------------------------------------------|---------------------------------------------------------------------------------------------------------------------------------------------------------------------------------------------------------------------|--------------------------------------------------------------------------------------------------------------------|
| <p>1. ในช่วง 3 เดือนที่ผ่านมา<br/>           ท่านมีอาการคล้ายกับมูกอน จกที่คือ<br/>           แน่นคอหรือมบางสงติดอยู่ในคอหรือไม่</p> | <p><input type="radio"/> ไม่เคย      →→→→→</p> <p>1 น้อยกว่า 1 วันต่อเดือน</p> <p>2 หนึ่งวันต่อเดือน</p> <p>3 สองถึงสามวันต่อเดือน</p> <p>4 หนึ่งวันต่อสัปดาห์</p> <p>5 มากกว่า 1 วันต่อสัปดาห์</p> <p>6 ทุกวัน</p> | <p><b>ข้ามไปทำข้อ 4</b></p> <p><input type="radio"/> คำถามเขาใจง่าย</p> <p><input type="radio"/> ไม่เขาใจคำถาม</p> |
| <p>2. ท่านมีอาการนานาน 6 เดือนหรือมากกว่าหรือไม่</p>                                                                                 | <p><input type="radio"/> ไม่ใช่</p> <p>1 ใช่</p>                                                                                                                                                                    | <p><input type="radio"/> คำถามเขาใจง่าย</p> <p><input type="radio"/> ไม่เขาใจคำถาม</p>                             |
| <p>3. อาการเกิดขึ้นขณะที่ท่านไม่ได้รับประทานอาหารใช่หรือไม่</p>                                                                      | <p><input type="radio"/> ไม่ใช่</p> <p>1 ใช่</p> <p><input type="radio"/> ไม่ใช่</p> <p>1 เป็นก่อนรับประทานอาหาร</p>                                                                                                | <p><input type="radio"/> คำถามเขาใจง่าย</p> <p><input type="radio"/> ไม่เขาใจคำถาม</p>                             |

# EAR3Q

วัน: \_\_\_\_/\_\_\_\_/\_\_\_\_

วัน      เดือน      ปี

รหัส: \_\_\_\_\_

|                                                                                                                        |                                                                                                                                                                                                        |                                                                                                                                                                             |
|------------------------------------------------------------------------------------------------------------------------|--------------------------------------------------------------------------------------------------------------------------------------------------------------------------------------------------------|-----------------------------------------------------------------------------------------------------------------------------------------------------------------------------|
| <p>ก. อาการเกิดขึ้นสมพันธกับการรับประทานอาหารหรือไม่</p> <p>ข. โดยปกติ ความรุนแรงของอาการ ม่มากนักน้อยเพียงใด</p>      | <p>2 เป็นขณะรับประทานอาหาร</p> <p>3 เป็นหลังรับประทานอาหาร</p> <p>1 มีอาการน้อยมาก</p> <p>2 มีอาการน้อย</p> <p>3 มีอาการปานกลาง</p> <p>4 มีอาการรุนแรง</p> <p>5 มีอาการรุนแรงมากที่สุด</p>             | <p><input type="radio"/> คางามเขาใจกาย</p> <p><input type="radio"/> ไม่เขาใจคางาม</p> <p><input type="radio"/> คางามเขาใจกาย</p> <p><input type="radio"/> ไม่เขาใจคางาม</p> |
| <p>4. ขณะทีทานรบประทานอาหารหรือดื่มทานมมีอาการ เจ็บขณะกลืนหรือไม่</p>                                                  | <p><input type="radio"/> ไม่เคย หรือ นอยครงมาก</p> <p>1 บางครง</p> <p>2 บอยๆ</p> <p>3 เกอบททครง</p> <p>4 ททครง</p>                                                                                     | <p><input type="radio"/> คางามเขาใจกาย</p> <p><input type="radio"/> ไม่เขาใจคางาม</p>                                                                                       |
| <p>ก. ขณะทีทานรบประทานอาหารหรือดื่มทานม ความสกกเจ็บหรือดอดไม่สบายขณะกลืนหรือไม่</p>                                    | <p><input type="radio"/> ไม่เคย หรือ นอยครงมาก</p> <p>1 บางครง</p> <p>2 บอยๆ</p> <p>3 เกอบททครง</p> <p>4 ททครง</p>                                                                                     | <p><input type="radio"/> คางามเขาใจกาย</p> <p><input type="radio"/> ไม่เขาใจคางาม</p>                                                                                       |
| <p>5. ในชวง 3 เดือนทีผ่านมา ทานมมีอาการเจ็บหรือแน่นไม่สบายบริเวณตรงกลางหนอกบอยแคไหน (โดยทีอาการไม่เกวยกับโรคหัวใจ)</p> | <p><input type="radio"/> ไม่เคย      →→→→→</p> <p>1 นอยกวา 1 วันตอเดือน</p> <p>2 หนึ่งวันตอเดือน</p> <p>3 สองถึงสามวันตอเดือน</p> <p>4 หนึ่งวันตอสปดาห</p> <p>5 มากกว่า 1 วันตอสปดาห</p> <p>6 ททวน</p> | <p><b>ชามไปทาขอ 8</b></p> <p><input type="radio"/> คางามเขาใจกาย</p> <p><input type="radio"/> ไม่เขาใจคางาม</p>                                                             |
| <p>6.ทานมมีอาการเจ็บหรือแน่นไม่สบายบริเวณตรงกลางหนอกน นานเทากบหรมมากกว่า 6 เดือน หรือไม่</p>                           | <p><input type="radio"/> ไม่ใช่</p> <p>1 ใช่</p>                                                                                                                                                       | <p><input type="radio"/> คางามเขาใจกาย</p>                                                                                                                                  |

# EAR3Q

วันที่: \_\_\_\_ / \_\_\_\_ / \_\_\_\_  
                   วัน           เดือน           ปี

รหัส: \_\_\_\_\_

|                                                                                                                                                                                               |                                                                                                                                                                                                |                                                                                                        |
|-----------------------------------------------------------------------------------------------------------------------------------------------------------------------------------------------|------------------------------------------------------------------------------------------------------------------------------------------------------------------------------------------------|--------------------------------------------------------------------------------------------------------|
|                                                                                                                                                                                               |                                                                                                                                                                                                | <input type="radio"/> ไม่เข้าใจคำถาม                                                                   |
| 7. เมื่อทานมีอาการเจ็บหน้าอก<br>อาการเจ็บหน้าอกนม<br>ลักษณะคล้ายแสบรอนบ่อยครั้งมากน้อยแค่ไหน                                                                                                  | <input type="radio"/> ไม่เคย หรอ น้อยครั้งมาก<br>1 บางครั้ง<br>2 บ่อยๆ<br>3 เกือบทุกครั้ง<br>4 ทุกครั้ง                                                                                        | <input type="radio"/> คำถามเข้าใจง่าย<br><input type="radio"/> ไม่เข้าใจคำถาม                          |
| 8. ในช่วง 3 เดือนที่ผ่านมา<br>ทานมีอาการแสบรอน บริเวณกลางหน้าอก<br>บ่อยมากน้อยแค่ไหน                                                                                                          | <input type="radio"/> ไม่เคย               →→→→→→<br>1 น้อยกว่า 1 วันต่อเดือน<br>2 หนึ่งวันต่อเดือน<br>3 สองถึงสามวันต่อเดือน<br>4 หนึ่งวันต่อสัปดาห์<br>5 มากกว่า 1 วันต่อสัปดาห์<br>6 ทุกวัน | <b>ข้ามไปทำข้อ 10</b><br><input type="radio"/> คำถามเข้าใจง่าย<br><input type="radio"/> ไม่เข้าใจคำถาม |
| 9. ทานมีอาการแสบรอนที่หน้าอกน<br>มานานเท่ากับ หรือมากกว่า 6 เดือนหรือไม่                                                                                                                      | <input type="radio"/> ไม่ใช่<br>1 ใช่                                                                                                                                                          | <input type="radio"/> คำถามเข้าใจง่าย<br><input type="radio"/> ไม่เข้าใจคำถาม                          |
| 10. ในช่วง 3 เดือนที่ผ่านมา<br>ที่ทานมีอาการรับประทานอาหาร<br>อาหารหรือดื่มน้ำแล้วรู้สึกอาหารหรือน้ำติดหลังจาก<br>กลืน<br>หรือรู้สึกอาหารหรือน้ำผ่านลงหน้าอกลงไปได้ ซ้ำๆ<br>บ่อยมากน้อยแค่ไหน | <input type="radio"/> ไม่เคย               →→→→→→<br>1 น้อยกว่า 1 วันต่อเดือน<br>2 หนึ่งวันต่อเดือน<br>3 สองถึงสามวันต่อเดือน<br>4 หนึ่งวันต่อสัปดาห์<br>5 มากกว่า 1 วันต่อสัปดาห์<br>6 ทุกวัน | <b>ข้ามไปทำข้อ 12</b><br><input type="radio"/> คำถามเข้าใจง่าย<br><input type="radio"/> ไม่เข้าใจคำถาม |
| 11. เมื่อทานมีอาการรับประทานอาหารแล้ว<br>สก                                       ติด<br>อาการระคายเคืองหรืออาการแสบรอนหน้าอก<br>หรือไม่                                                      | <input type="radio"/> ไม่เคยเกิดขึ้นหรือเกิดขึ้นน้อยครั้งมาก<br>1 เกิดบางครั้ง<br>2 เกิดบ่อยๆ<br>3 เกิดเกือบทุกครั้ง<br>4 เกิดทุกครั้ง                                                         | <input type="radio"/> คำถามเข้าใจง่าย<br><input type="radio"/> ไม่เข้าใจคำถาม                          |

# EAR3Q

วัน: \_\_\_\_ / \_\_\_\_ / \_\_\_\_

รหัส: \_\_\_\_\_

วัน      เดือน      ปี

|                                                                                                                                                                                                                                                                                                                                                                                                                                               |                                                                                                                                                                                                                                                                                                                                                                                                                             |                                                                                                                       |
|-----------------------------------------------------------------------------------------------------------------------------------------------------------------------------------------------------------------------------------------------------------------------------------------------------------------------------------------------------------------------------------------------------------------------------------------------|-----------------------------------------------------------------------------------------------------------------------------------------------------------------------------------------------------------------------------------------------------------------------------------------------------------------------------------------------------------------------------------------------------------------------------|-----------------------------------------------------------------------------------------------------------------------|
|                                                                                                                                                                                                                                                                                                                                                                                                                                               | 5 ยากที่จะตอบคำถาม                                                                                                                                                                                                                                                                                                                                                                                                          |                                                                                                                       |
| <p>12. อาการรับประทานอาหารแล้วรู้สึกติดที่สมพงษ์กบ</p> <p>อาการแสบร้อนหน้าอกเป็นมานานมากกว่าหรือเท่ากับ 6 เดือน ใช่หรือไม่</p>                                                                                                                                                                                                                                                                                                                | <p><input type="radio"/> ไม่ใช่</p> <p><input type="radio"/> ใช่</p>                                                                                                                                                                                                                                                                                                                                                        | <p><input type="radio"/> คำถามเข้าใจง่าย</p> <p><input type="radio"/> ไม่เข้าใจคำถาม</p>                              |
| <p>13. ในช่วง 3 เดือนที่ผ่านมา ทานรสไม่สบายท้องจากอาการคล้ายอาหารค้างอยู่ในกระเพาะอาหารนานกว่าปกติ หลงรับประทานอาหารปริมาณปกติ หรือไม่อย่างไร</p>                                                                                                                                                                                                                                                                                             | <p><input type="radio"/> ไม่เคย      →→→→→</p> <p>1 น้อยกว่า 1 วันต่อเดือน</p> <p>2 หนึ่งวันต่อเดือน</p> <p>3 สองถึงสามวันต่อเดือน</p> <p>4 หนึ่งวันต่อสัปดาห์</p> <p>5 มากกว่า 1 วันต่อสัปดาห์</p> <p>6 ทกววน</p>                                                                                                                                                                                                          | <p><b>ข้ามไปทำข้อ 15</b></p> <p><input type="radio"/> คำถามเข้าใจง่าย</p> <p><input type="radio"/> ไม่เข้าใจคำถาม</p> |
| <p>14. อาการไม่สบายท้องจากอาการคล้ายอาหารค้างอยู่ในกระเพาะอาหารนานกว่าปกติ หลงรับประทานอาหารปริมาณปกติ เป็นมานานเท่ากับหรือมากกว่า 6 เดือน ใช่หรือไม่</p> <p>ก) อาการไม่สบายท้องจากอาการคล้ายอาหารค้างอยู่ในกระเพาะอาหารนานกว่าปกติใน สมพงษ์กบการรับประทานอาหารหรือไม่ และถ้าสมพงษ์กบการรับประทานอาหาร จะสมพงษ์กบปริมาณอาหารเท่าใด</p> <p>ข) โดยปกติ ทานมีอาการไม่สบายท้องจากอาการคล้ายอาหารค้างอยู่ในกระเพาะอาหารนานกว่าปกติ ที่บริเวณใด</p> | <p><input type="radio"/> ไม่ใช่</p> <p><input type="radio"/> ใช่</p> <p><input type="radio"/> ไม่สมพงษ์กบ</p> <p><input type="radio"/> สมพงษ์กบ</p> <p>1 สมพงษ์กบขนาดอาหารปริมาณมากกว่าปกติที่รับประทาน</p> <p>2 สมพงษ์กบขนาดอาหารปริมาณปกติที่รับประทาน</p> <p>3 สมพงษ์กบขนาดอาหารปริมาณน้อยกว่าปกติที่รับประทาน</p> <p>1 ช่องท้องด้านบน</p> <p>2 ช่องท้องด้านล่าง</p> <p>3 รอบๆสะดือ</p> <p>4 ทวทงของทง</p> <p>5 หนาก</p> | <p><input type="radio"/> คำถามเข้าใจง่าย</p> <p><input type="radio"/> ไม่เข้าใจคำถาม</p>                              |

# EAR3Q

วัน: \_\_\_\_/\_\_\_\_/\_\_\_\_

วัน      เดือน      ปี

รหัส: \_\_\_\_\_

|                                                                                                                                                                                                                                                                                                                                                                                                                                                                                                                                                                                                                                                                                                                                   |                                                                                                                                                                                                                                                                                                                                 |                     |
|-----------------------------------------------------------------------------------------------------------------------------------------------------------------------------------------------------------------------------------------------------------------------------------------------------------------------------------------------------------------------------------------------------------------------------------------------------------------------------------------------------------------------------------------------------------------------------------------------------------------------------------------------------------------------------------------------------------------------------------|---------------------------------------------------------------------------------------------------------------------------------------------------------------------------------------------------------------------------------------------------------------------------------------------------------------------------------|---------------------|
| <p>ค) กรณีระบตาแห้งที่ท่านรู้สึกมีอาการไม่สบาย<br/>         ทงจากอาการคลายอาหารคางอยในกระเพาะ<br/>         อาหารนานกวาปกติ ที่แผนภาพดานขวาโดยการ<br/>         กากบาท บริเวณตาแห้งนั้น ถ้ามีอาการมากกว่า<br/>         1 ตาแห้ง ให้ระบตาแห้งที่อาการรบกวนทานมาก<br/>         ที่สุด</p> <p>ง) อาการไม่สบายทงจากอาการคลายอาหารคางอย<br/>         ในกระเพาะอาหารนานกวาปกติของท่าน ส่วนใหญ่<br/>         ดีขึ้นได้ด้วยวิธีใด</p> <p>จ) อาการไม่สบายทงจากอาการคลายอาหารคาง<br/>         อยในกระเพาะอาหารนานกวาปกติของท่าน<br/>         รนแรง เพียงใด</p> <p>ด) ระวังที่ท่านมีอาการไม่สบายทงจากอาการ<br/>         คลายอาหารคางอยในกระเพาะอาหารนานกวาปกติ<br/>         ของท่าน ท่านจะต้องรบเขาหองนาเพื่อถ่ายอจาระ<br/>         หรือไม</p> | <p>1 โดยการถ่ายอจาระ</p> <p>2 โดยการฝายลม</p> <p>3 โดยการฝายลมและถ่ายอจาระ</p> <p>4 ไมดีขึ้นทงโดยการฝายลมหรือถ่ายอจาระ</p> <p>5 เรอ(ปนลม)</p><br><p>1 อาการนอยมาก</p> <p>2 อาการนอย</p> <p>3 อาการปานกลาง</p> <p>4 อาการรนแรง</p> <p>5 อาการรนแรงมาก</p><br><p><input type="radio"/> ไมใช่</p> <p><input type="radio"/> ใช่</p> |                     |
| <p>15. ในช่วง 3 เดือนที่ผ่านมา บอยคองมากนอยแคไหนที่</p>                                                                                                                                                                                                                                                                                                                                                                                                                                                                                                                                                                                                                                                                           | <p><input type="radio"/> ไมเคย      →→→→→</p>                                                                                                                                                                                                                                                                                   | <p>ขามไปทาขอ 17</p> |



# EAR3Q

วันที่: \_\_\_\_/\_\_\_\_/\_\_\_\_

วัน      เดือน      ปี

รหัส: \_\_\_\_\_

|                                                                                                                                                                                                                                                                                                                                     |                                                                                                                                                                                                                                                                                                                                                                                                                      |                                                                                                                                                                                                                                               |
|-------------------------------------------------------------------------------------------------------------------------------------------------------------------------------------------------------------------------------------------------------------------------------------------------------------------------------------|----------------------------------------------------------------------------------------------------------------------------------------------------------------------------------------------------------------------------------------------------------------------------------------------------------------------------------------------------------------------------------------------------------------------|-----------------------------------------------------------------------------------------------------------------------------------------------------------------------------------------------------------------------------------------------|
| <p>ทานไม่สามารถรับประทานอาหารในปริมาณปกติได้หมด</p>                                                                                                                                                                                                                                                                                 | <p>1 น้อยกว่า 1 วันต่อเดือน<br/>                 2 หนึ่งวันต่อเดือน<br/>                 3 สองถึงสามวันต่อเดือน<br/>                 4 หนึ่งวันต่อสัปดาห์<br/>                 5 มากกว่า 1 วันต่อสัปดาห์<br/>                 6 ทกววน</p>                                                                                                                                                                            | <p><input type="radio"/> คางามเขาใจกาย<br/> <input type="radio"/> ไม่เขาใจคากาม</p>                                                                                                                                                           |
| <p>16. ทานไม่สามารถรับประทานอาหารปริมาณปกติได้หมด นานเทากบหรอมากกว่า 6 เดือนหรือไม</p>                                                                                                                                                                                                                                              | <p><input type="radio"/> ไมไซ<br/> <input type="radio"/> ไช</p>                                                                                                                                                                                                                                                                                                                                                      | <p><input type="radio"/> คากามเขาใจกาย<br/> <input type="radio"/> ไม่เขาใจคากาม</p>                                                                                                                                                           |
| <p>17. ในชวง 3 เดือนที่ผ่านมา ทานมีอาการปวดทองหรือ แสบรอนทองที่บริเวณตรงกลางของทองเหนอต่อสะดืออ(ลนป) แต่ไมสงขึ้นไปถึงหนออหรือไม</p> <p>ก)<br/>                 โปรดชี้ตาแหน่งที่มีอาการปวดหรือแสบรอนทองในรูปदानขวามืออ ถามีอาการมากกว่า 1 ตาแหน่ง ให้ระบตาแหน่งที่อาการรบกวนทานมากที่สุด</p> <p>ข) ทานมีอาการแสบหรือปวดทองแบบใด</p> | <p><input type="radio"/> ไมเคย      →→→→</p> <p>1 น้อยกว่า 1 วันต่อเดือน<br/>                 2 หนึ่งวันต่อเดือน<br/>                 3 สองถึงสามวันต่อเดือน<br/>                 4 หนึ่งวันต่อสัปดาห์<br/>                 5 มากกว่า 1 วันต่อสัปดาห์<br/>                 6 ทกววน</p> <p>1 อาการปวดทองอยางเดียว<br/>                 2 อาการแสบรอนทองอยางเดียว<br/>                 3 อาการทงปวดทองและแสบรอนทอง</p> | <p><b>ขามไปทาชอ 26</b></p> <p><input type="radio"/> คากามเขาใจกาย<br/> <input type="radio"/> ไม่เขาใจคากาม</p> <div style="text-align: center;"> 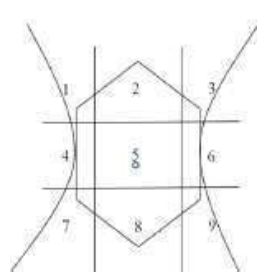 </div> |
| <p>18. ทานมีอาการปวดทองหรือแสบรอนทอง นานเทากบ หรอมากกว่า 6 เดือน ไชหรือไม</p>                                                                                                                                                                                                                                                       | <p><input type="radio"/> ไมไซ<br/> <input type="radio"/> ไช</p>                                                                                                                                                                                                                                                                                                                                                      | <p><input type="radio"/> คากามเขาใจกาย<br/> <input type="radio"/> ไม่เขาใจคากาม</p>                                                                                                                                                           |

# EAR3Q

วัน: \_\_\_\_/\_\_\_\_/\_\_\_\_

รหัส: \_\_\_\_\_

วัน      เดือน      ปี

|                                                                                                                                                 |                                                                                                                                                               |                                                                                       |
|-------------------------------------------------------------------------------------------------------------------------------------------------|---------------------------------------------------------------------------------------------------------------------------------------------------------------|---------------------------------------------------------------------------------------|
| <p>19. อาการปวดท้องหรือแสบรอนท้องนเป็นแลวหาย<br/>สนทภายในวันเดียวหรือไม่</p>                                                                    | <p><input type="radio"/> ไม่เคยเกิดขึ้นหรือเกิดขึ้นน้อยครั้งมาก</p> <p>1 เกิดบางครั้ง</p> <p>2 เกิดบ่อยๆ</p> <p>3 เกิดเกือบทุกครั้ง</p> <p>4 เกิดทุกครั้ง</p> | <p><input type="radio"/> คางามเขาใจกาย</p> <p><input type="radio"/> ไม่เขาใจคางาม</p> |
| <p>20. โดยปกติ อาการปวดท้องหรือแสบรอนท้องที่บริเวณ<br/>ตรงกลางของท้องเหนือตอสะดือ (ลนป) แต่ไม่สงขึ้นไป<br/>เหนือหนอก มีควมรนแรงมากนอยแค่ไหน</p> | <p>1 มีอาการนอยมาก</p> <p>2 มีอาการนอย</p> <p>3 มีอาการปานกลาง</p> <p>4 มีอาการมาก</p> <p>5 มีอาการมากที่สุด</p>                                              | <p><input type="radio"/> คางามเขาใจกาย</p> <p><input type="radio"/> ไม่เขาใจคางาม</p> |
| <p>21. การรประทานอาหารมีผลต่ออาการปวดท้องหรือ<br/>แสบรอนท้องที่บริเวณตรงกลางของท้องเหนือตอสะดือ<br/>แต่ ไม่สงขึ้นไปเหนือหนอกน หรือไม อยางไร</p> | <p>1 การรประทานอาหารไม่มีผล</p> <p>2 อาการปวดท้องแย่งลงหลจากรรประทานอาหาร</p> <p>3 อาการปวดท้องนอยลงหลจรรรประทานอาหาร</p>                                     | <p><input type="radio"/> คางามเขาใจกาย</p> <p><input type="radio"/> ไม่เขาใจคางาม</p> |
| <p>22. อาการปวดท้องหรือแสบรอนท้องน ดีชนหลจการ<br/>รประทานยาลดกรดในกร ะเพาะอาหาร (antacid)<br/>หรือไม่</p>                                       | <p><input type="radio"/> ไม่เคยเกิดขึ้นหรือเกิดขึ้นน้อยครั้งมาก</p> <p>1 เกิดบางครั้ง</p> <p>2 เกิดบ่อยๆ</p> <p>3 เกิดเกือบทุกครั้ง</p> <p>4 เกิดทุกครั้ง</p> | <p><input type="radio"/> คางามเขาใจกาย</p> <p><input type="radio"/> ไม่เขาใจคางาม</p> |
| <p>22. อาการปวดท้องหรือแสบรอนท้องน มกดีชน<br/>หรืออาการหายไปหลจถายอจจระหรือการฝาย<br/>ลม ไซหรือไม่</p>                                          | <p><input type="radio"/> ไม่เคยเกิดขึ้นหรือเกิดขึ้นน้อยครั้งมาก</p> <p>1 เกิดบางครั้ง</p> <p>2 เกิดบ่อยๆ</p> <p>3 เกิดเกือบทุกครั้ง</p> <p>4 เกิดทุกครั้ง</p> | <p><input type="radio"/> คางามเขาใจกาย</p> <p><input type="radio"/> ไม่เขาใจคางาม</p> |

# EAR3Q

วันที่: \_\_\_\_ / \_\_\_\_ / \_\_\_\_

วัน เดือน ปี

รหัส: \_\_\_\_\_

|                                                                                                                                                                                                                                                                                      |                                                                                                                                                                                                                                                                                                                                                                                                                                                                                                                                  |                                                                                      |
|--------------------------------------------------------------------------------------------------------------------------------------------------------------------------------------------------------------------------------------------------------------------------------------|----------------------------------------------------------------------------------------------------------------------------------------------------------------------------------------------------------------------------------------------------------------------------------------------------------------------------------------------------------------------------------------------------------------------------------------------------------------------------------------------------------------------------------|--------------------------------------------------------------------------------------|
| <p>23) อาการปวดท้องหรือแสบร้อนท้องน จะดีขึ้นหรือหยุดปวดหลังจากการถ่ายอุจจาระหรือผายลม หรือไม่</p> <p>ก) อาการปวดท้องหรือแสบร้อนท้องนดีขึ้นหลังจากการถ่ายอุจจาระหรือผายลม หรือไม่</p> <p>ข) อาการปวดท้องหรือแสบร้อนท้องนเป็นมากขึ้นหรือแผลงหลังจากการถ่ายอุจจาระหรือผายลม หรือไม่</p> | <p><input type="radio"/> ไม่เคยเกิดขึ้นหรือเกิดขึ้นน้อยครั้งมาก</p> <p>1 เกิดบางครั้ง</p> <p>2 เกิดบ่อยๆ</p> <p>3 เกิดเกือบทุกครั้ง</p> <p>4 เกิดทุกครั้ง</p><br><p><input type="radio"/> ไม่ดีขึ้นทั้งโดยถ่ายอุจจาระหรือผายลม</p> <p>1 ดีขึ้นหลังจากถ่ายอุจจาระ</p> <p>2 ดีขึ้นหลังจากผายลม</p> <p>3 อาการดีขึ้นทั้งหลังจากถ่ายจากอุจจาระและผายลม</p> <p><input type="radio"/> ไม่แยลงทั้งหลังถ่ายอุจจาระหรือผายลม</p> <p>1 แยลงหลังจากถ่ายอุจจาระ</p> <p>2 แยลงหลังจากผายลม</p> <p>3 แยลงทั้งหลังจากถ่ายจากอุจจาระและผายลม</p> | <p><input type="radio"/> คางามเขาใจกาย</p> <p><input type="radio"/> ไมเขาใจคากาม</p> |
| <p>24. เมื้อทานมอาการปวดท้องหรือแสบร้อนท้องนทาน จะมีการเปลี่นแปลงของจนวนครงของการถ่ายอุจจาระ หรือไม่ (จนวนครงการถ่ายอุจจาระมากขน หรอนอยลง)</p>                                                                                                                                       | <p><input type="radio"/> ไม่เคยเกิดขึ้นหรือเกิดขึ้นน้อยครั้งมาก</p> <p>1 เกิดบางครั้ง</p> <p>2 เกิดบ่อยๆ</p> <p>3 เกิดเกือบทุกครั้ง</p> <p>4 เกิดทุกครั้ง</p>                                                                                                                                                                                                                                                                                                                                                                    | <p><input type="radio"/> คากามเขาใจกาย</p> <p><input type="radio"/> ไมเขาใจคากาม</p> |
| <p>25. เมื้อทานมอาการปวดท้องหรือแสบร้อนท้องนทาน มีมีการเปลี่นแปลงของลักษณะของอุจจาระเป็นนมลง หรือแข็งขึ้นหรือไม่</p>                                                                                                                                                                 | <p><input type="radio"/> ไม่เคยเกิดขึ้นหรือเกิดหรอนานๆเกิดครง</p> <p>1 เกิดบางครั้ง</p> <p>2 เกิดบ่อยๆ</p> <p>3 เกิดเกือบทุกครั้ง</p> <p>4 เกิดทุกครั้ง</p>                                                                                                                                                                                                                                                                                                                                                                      | <p><input type="radio"/> คากามเขาใจกาย</p> <p><input type="radio"/> ไมเขาใจคากาม</p> |

# EAR3Q

วัน: \_\_\_\_ / \_\_\_\_ / \_\_\_\_  
วัน      เดือน      ปี

รหัส: \_\_\_\_\_

|                                                                                                                  |                                                                                                                                                                                                                    |                                                                                                                       |
|------------------------------------------------------------------------------------------------------------------|--------------------------------------------------------------------------------------------------------------------------------------------------------------------------------------------------------------------|-----------------------------------------------------------------------------------------------------------------------|
| <p>26. ในช่วง 3 เดือนที่ผ่านมา<br/>         บอยมากน้อยแค่ไหนที่ท่าน<br/>         มีอาการคลื่นไส้ที่รบกวนท่าน</p> | <p><input type="radio"/> ไม่เคย      →→→→→</p> <p>1 น้อยกว่า 1 วันต่อเดือน</p> <p>2 หนึ่งวันต่อเดือน</p> <p>3 สองถึงสามวันต่อเดือน</p> <p>4 หนึ่งวันต่อสัปดาห์</p> <p>5 มากกว่า 1 วันต่อสัปดาห์</p> <p>6 ทกวัน</p> | <p><b>ข้ามไปทำข้อ 28</b></p> <p><input type="radio"/> คางามเข้าใจง่าย</p> <p><input type="radio"/> ไม่เข้าใจคางาม</p> |
| <p>27. ท่านมีอาการคลื่นไส้นานมานานมากกว่า 6<br/>         เดือน ใช่หรือไม่</p>                                    | <p><input type="radio"/> ไม่ใช่</p> <p><input type="radio"/> ใช่</p>                                                                                                                                               | <p><input type="radio"/> คางามเข้าใจง่าย</p> <p><input type="radio"/> ไม่เข้าใจคางาม</p>                              |
| <p>28. ในช่วง 3 เดือนที่ผ่านมา<br/>         ท่านมีอาการอาเจียน บอยมากน้อยแค่ไหน</p>                              | <p><input type="radio"/> ไม่เคย      →→→→→</p> <p>1 น้อยกว่า 1 วันต่อเดือน</p> <p>2 หนึ่งวันต่อเดือน</p> <p>3 สองถึงสามวันต่อเดือน</p> <p>4 หนึ่งวันต่อสัปดาห์</p> <p>5 มากกว่า 1 วันต่อสัปดาห์</p> <p>6 ทกวัน</p> | <p><b>ข้ามไปทำข้อ 33</b></p> <p><input type="radio"/> คางามเข้าใจง่าย</p> <p><input type="radio"/> ไม่เข้าใจคางาม</p> |
| <p>29.<br/>         ท่านมีอาการอาเจียนเป็นมานานเทากบหรือ</p>                                                     | <p><input type="radio"/> ไม่ใช่</p> <p><input type="radio"/> ใช่</p>                                                                                                                                               | <p><input type="radio"/> คางามเข้าใจง่าย</p> <p><input type="radio"/> ไม่เข้าใจคางาม</p>                              |
| <p>30. ท่านกระตุนให้ตัวเองอาเจียน หรือไม่</p>                                                                    | <p><input type="radio"/> ไม่เคยเกิดข่นหรือเกิดข่นน้อยครงมาก</p> <p>1 เกิดบางครั้ง</p> <p>2 เกิดบอยๆ</p> <p>3 เกิดเกือบทกครง</p> <p>4 เกิดทกครง</p>                                                                 | <p><input type="radio"/> คางามเข้าใจง่าย</p> <p><input type="radio"/> ไม่เข้าใจคางาม</p>                              |
| <p>31. ในปีที่ผ่านมมา อาการอาเจียนเกิดเป็นขวงๆ<br/>         ขวงละ ประมาณ 2-3 วันแลวหายไป ใช่หรือไม่</p>          | <p><input type="radio"/> ไม่เคยเกิดข่นหรือเกิดข่นน้อยครงมาก →→→→→</p> <p>1 เกิดบางครั้ง</p> <p>2 เกิดบอยๆ</p> <p>3 เกิดเกือบทกครง</p> <p>4 เกิดทกครง</p>                                                           | <p><b>ข้ามไปทำข้อ 33</b></p> <p><input type="radio"/> คางามเข้าใจง่าย</p> <p><input type="radio"/> ไม่เข้าใจคางาม</p> |

# EAR3Q

วันที่: \_\_\_\_/\_\_\_\_/\_\_\_\_

รหัส: \_\_\_\_\_

วัน      เดือน      ปี

|                                                                                                                                         |                                                                                                                                                                                                   |                                                                                                                 |
|-----------------------------------------------------------------------------------------------------------------------------------------|---------------------------------------------------------------------------------------------------------------------------------------------------------------------------------------------------|-----------------------------------------------------------------------------------------------------------------|
| <p>32. ทานมี้อาการอาเจียนอย่างน้อย 3 ครั้งในเวลาใน 1 ปีที่ผ่านมา ใช่หรือไม่</p>                                                         | <p><input type="radio"/> ไม่ใช่</p> <p><input type="radio"/> ใช่</p>                                                                                                                              | <p><input type="radio"/> คางามเขาใจาย</p> <p><input type="radio"/> ไม่เขาใจคากาม</p>                            |
| <p>33. ในซวง 3 เดือนที่ผ่านมา ทานมี้อาการอาหาร ยอนขนมาในปากของทาน บอยมากนอยแคไหน</p>                                                    | <p><input type="radio"/> ไม่เคย      →→→→</p> <p>1 นอยกว่า 1 วนตอเดือน</p> <p>2 หนึ่งวนตอเดือน</p> <p>3 สองถึงสามวนตอเดือน</p> <p>4 หนึ่งวนตอสปดาห</p> <p>5 มากกว่า 1 วนตอสปดาห</p> <p>6 ทกวน</p> | <p><b>ซามไปทาซอ 39</b></p> <p><input type="radio"/> คางามเขาใจาย</p> <p><input type="radio"/> ไม่เขาใจคากาม</p> |
| <p>34. ทานมี้อาการอาหารยอนขนมาในปาก นานมา กวาทรอเทากบ 6 เดือน ใช่หรือไม่</p>                                                            | <p><input type="radio"/> ไม่ใช่</p> <p><input type="radio"/> ใช่</p>                                                                                                                              | <p><input type="radio"/> คางามเขาใจาย</p> <p><input type="radio"/> ไม่เขาใจคากาม</p>                            |
| <p>35. เมื่้อมี้อาการอาหารยอนกลบขนมาในปากของทาน อาหารมจะคองยในปากของทานระยะเวลาหนึ่งก่อนที่ มนจะถกกลืนลงไปหรือบวนทิงออกมาใช่หรือไม่</p> | <p><input type="radio"/> ไม่เคยเกิดขนหรือเกิดขนนอยคองมาก</p> <p>1 เกิดบางคอง</p> <p>2 เกิดบอยๆ</p> <p>3 เกิดเกอบทกคอง</p> <p>4 เกิดทกคอง</p>                                                      | <p><input type="radio"/> คางามเขาใจาย</p> <p><input type="radio"/> ไม่เขาใจคากาม</p>                            |
| <p>36. ทานมี้อาการชยอนก่อนที่จะมี้อาหารยอนขนมาใน ปากทานหรือไม่</p>                                                                      | <p><input type="radio"/> ไม่เคยเกิดขนหรือเกิดขนนอยคองมาก</p> <p>1 เกิดบางคอง</p> <p>2 เกิดบอยๆ</p> <p>3 เกิดเกอบทกคอง</p> <p>4 เกิดทกคอง</p>                                                      | <p><input type="radio"/> คางามเขาใจาย</p> <p><input type="radio"/> ไม่เขาใจคากาม</p>                            |
| <p>37. เมื่้อทานมี้อาการอาหารยอนขนมาในปากของ ทาน ทานมี้อาการอาเจียนหรือรอกไมสบายในทอง ของทาน (คลื่่นไส้) บอยมากนอยแคไหน</p>             | <p><input type="radio"/> ไม่เคยเกิดขนหรือเกิดขนนอยคองมาก</p> <p>1 เกิดบางคอง</p> <p>2 เกิดบอยๆ</p> <p>3 เกิดเกอบทกคอง</p> <p>4 เกิดทกคอง</p>                                                      | <p><input type="radio"/> คางามเขาใจาย</p> <p><input type="radio"/> ไม่เขาใจคากาม</p>                            |
| <p>38. อาหารที่ียอนขนมาหยดอยในปากของทาน</p>                                                                                             | <p><input type="radio"/> ไม่เคยเกิดขนหรือเกิดขนนอยคองมาก</p> <p>1 เกิดบางคอง</p>                                                                                                                  | <p><input type="radio"/> คางามเขาใจาย</p> <p><input type="radio"/> ไม่เขาใจคากาม</p>                            |

# EAR3Q

วัน: \_\_\_\_/\_\_\_\_/\_\_\_\_

วัน      เดือน      ปี

รหัส: \_\_\_\_\_

|                                                                                                                                                                                                                                                                                                                                                      |                                                                                                                                                                                                                           |                                                                                                     |
|------------------------------------------------------------------------------------------------------------------------------------------------------------------------------------------------------------------------------------------------------------------------------------------------------------------------------------------------------|---------------------------------------------------------------------------------------------------------------------------------------------------------------------------------------------------------------------------|-----------------------------------------------------------------------------------------------------|
|                                                                                                                                                                                                                                                                                                                                                      | 2 เกือบบ่อยๆ<br>3 เกือบทุกทศวรรษ<br>4 เกือบทุกทศวรรษ                                                                                                                                                                      |                                                                                                     |
| 39. ในช่วง 3 เดือนที่ผ่านมา<br>ท่านมีอาการเรื้อรัง<br>หนักจนต้องหยุดทำงาน บ่อยมากน้อย<br>แค่ไหน                                                                                                                                                                                                                                                      | <input type="radio"/> ไม่เคย      →→→→→<br>1 น้อยกว่า 1 วันต่อเดือน<br>2 หนึ่งวันต่อเดือน<br>3 สองถึงสามวันต่อเดือน<br>4 หนึ่งวันต่อสัปดาห์<br>5 มากกว่า 1 วันต่อสัปดาห์<br>6 ทุกวัน                                      | <b>ข้ามไปทำข้อ 41</b><br><input type="radio"/> คางามเขาใจกาย<br><input type="radio"/> ไม่เขาใจคางาม |
| 40. อาการเรื้อรังที่รบกวนต่อชีวิตประจำวัน<br>น เรม เปนมานานมากกว่า 6 เดือน ใช่หรือไม่<br><br>ก) ท่านมีอาการเรื้อรังก่อนอาหารหรือไม่<br><br>ข)<br>ท่านมีอาการเรื้อรังระหว่างรับประทานอาหารใช่<br>หรือไม่<br><br>ค)<br>ท่านมีอาการเรื้อรังหลังรับประทานอาหารใช่<br>หรือไม่<br><br>ง)<br>ท่านมีอาการเรื้อรังที่ไม่สมพินธกกับการรับประทานอาหารใช่หรือไม่ | <input type="radio"/> ไม่ใช่<br>1 ใช่<br><br><input type="radio"/> ไม่ใช่<br>1 ใช่<br><br><input type="radio"/> ไม่ใช่<br>1 ใช่<br><br><input type="radio"/> ไม่ใช่<br>1 ใช่<br><br><input type="radio"/> ไม่ใช่<br>1 ใช่ | <input type="radio"/> คางามเขาใจกาย<br><input type="radio"/> ไม่เขาใจคางาม                          |

# EAR3Q

วัน: \_\_\_\_ / \_\_\_\_ / \_\_\_\_  
วัน      เดือน      ปี

รหัส: \_\_\_\_\_

|                                                                                                                                     |                                                                                                                                                                                                                                                                 |                                                                                                     |
|-------------------------------------------------------------------------------------------------------------------------------------|-----------------------------------------------------------------------------------------------------------------------------------------------------------------------------------------------------------------------------------------------------------------|-----------------------------------------------------------------------------------------------------|
| <p>จ) โดยปกติอาการเรอมีีความรุนแรงมากน้อยเพียงใด</p>                                                                                | <p>1 มีีอาการน้อยมาก<br/>                 2 มีีอาการน้อย<br/>                 3 มีีอาการปานกลาง<br/>                 4 มีีอาการมาก<br/>                 5 มีีอาการมากที่สุด</p>                                                                                 |                                                                                                     |
| <p>ด) โดยปกติอาการเรอจะดีขึ้นหลังจากสัั้งใดต่อไปน</p>                                                                               | <p>1 การถ่ายอจจาระ<br/>                 2 การผายลม<br/>                 3 การรับประทานอาหาร</p>                                                                                                                                                                 |                                                                                                     |
| <p>ข) อาการเรอเกิดขึ้นเวลาเดียวกับอาการใดต่อไปน</p>                                                                                 | <p>1 อาการท้องอืด<br/>                 2 อาการปวดท้อง<br/>                 3 อาการแสบรอนหนาก<br/>                 4 อาการขยอนอาหารขึ้นมาที่ี่ปาก<br/>                 5 อาการขยอนน้าขึ้นมาที่ี่ปาก</p>                                                          |                                                                                                     |
| <p>ณ) อาการเรอของท่านบรรเทาลงด้วยวิธีใดต่อไปน</p>                                                                                   | <p>1 รับประทานอาหาร<br/>                 2 ผายลม<br/>                 3. หลังการถ่ายอจจาระ<br/>                 4. ยานาลดกรดหรือยาที่ลดกรดในกระเพาะอาหาร<br/>                 5. ไม่ดีขึ้นด้วยวิธีใดข้างตน</p>                                                  |                                                                                                     |
| <p>41. ใน 3 เดือนที่ผ่านมา<br/>                 ท่านมีีอาการรอกคอดหรือ<br/>                 ปวดที่ี่สวนใดสวนหนึ่งของท้องหรือไม่</p> | <p>0 ไม่เคย      →→→→→<br/>                 1 น้อยกว่า 1 วันต่อเดือน<br/>                 2 หนึ่งวันต่อเดือน<br/>                 3 สองถึงสามวันต่อเดือน<br/>                 4 หนึ่งวันต่อสปดาห์<br/>                 5 มากกว่า 1 วันต่อสปดาห์      6 ทกวน</p> | <p><b>ขามไปทาขอ 52</b><br/>                 0 คาถามเขาใจาย<br/>                 0 ไม่เขาใจคาถาม</p> |

# EAR3Q

วน: \_\_\_\_/\_\_\_\_/\_\_\_\_

วัน      เดือน      ปี

รหัส: \_\_\_\_\_

|                                                                                                                                                                          |                                                                                                                                       |                                                                                     |
|--------------------------------------------------------------------------------------------------------------------------------------------------------------------------|---------------------------------------------------------------------------------------------------------------------------------------|-------------------------------------------------------------------------------------|
| <p>ก) โปรดระบุดาแหน่งที่ท่านรอกอดดหรือปวดทอง ในรปดานขวา</p> <p>ถาทานมีอาการมากกว่า หนึ่งดาแหน่ง</p> <p>ใหระบุดาแหน่งที่มีอาการ</p> <p>รบกวนทานมากที่สุด</p>              |                                                                                                                                       | 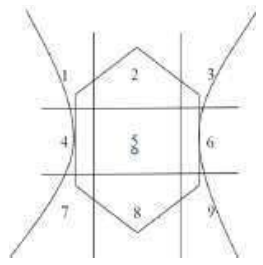 |
| <p>42. ทานมีอาการปวดทองอยางเดียวหรือไม (อาการปวดทองที่ไม่ใช่อาการรอกอดดไมสบายในทองและไมใช่ ม อาการรอกอดดไมสบายทองรวมกบอาการปวดทอง)</p>                                   | <p><input type="radio"/> ไมเคยเกดขนหรือเกดขนนอยครงมาก</p> <p>1 เกดบางครง</p> <p>2 เกดบอยๆ</p> <p>3 เกดเกอบทกครง</p> <p>4 เกดทกครง</p> | <p><input type="radio"/> คาถามเขาใจาย</p> <p><input type="radio"/> ไมเขาใจคาถาม</p> |
| <p>ก) ทานมีอาการอะไรบาง</p>                                                                                                                                              | <p>1 ปวดทองอยางเดียว</p> <p>2 ไมสบาย/รอกอดดทองอยางเดียว</p> <p>3 ปวดทองและรอกอดดมสบายทองรวมกันทง 2 อยาง</p>                           |                                                                                     |
| <p>43. สาหรบผปวยหญิง อาการรอกอดดไมสบายทองหรือปวดทองน</p> <p>เกดขนเฉพาะขงที่มีประจาเดียนเพีย</p> <p>อยางเดียว และไมเกดขงเวลาอื่น ใหรือไม</p>                              | <p><input type="radio"/> ไมใช่</p> <p>1 ใช่</p> <p>2 ไมสามารถบอกไดเนองจากหมดประจาเดียนแลวหรือผปวยเป้นผชาย</p>                         | <p><input type="radio"/> คาถามเขาใจาย</p> <p><input type="radio"/> ไมเขาใจคาถาม</p> |
| <p>44. เมื่้อท่านมีอาการรอกอดดหรือปวดทองน</p> <p>บอยมาก</p> <p>แคไหนที่อาการนจากดการประกอบกิจวตร</p> <p>ประจาวนของทาน (เซน ทางาน, ทางานบาน, และ การเขาจกรรมทางสังคม)</p> | <p><input type="radio"/> ไมเคยเกดขนหรือเกดขนนอยครงมาก</p> <p>1 เกดบางครง</p> <p>2 เกดบอยๆ</p> <p>3 เกดเกอบทกครง</p> <p>4 เกดทกครง</p> | <p><input type="radio"/> คาถามเขาใจาย</p> <p><input type="radio"/> ไมเขาใจคาถาม</p> |
| <p>45.</p> <p>ทานมีอาการรอกอดดไมสบายทองหรือปวดทอง น</p> <p>นานเทาบทหรอมากกว่า 6 เดือน ใหรือไม</p>                                                                        | <p><input type="radio"/> ไมใช่</p> <p>1 ใช่</p>                                                                                       | <p><input type="radio"/> คาถามเขาใจาย</p> <p><input type="radio"/> ไมเขาใจคาถาม</p> |



# EAR3Q

วัน: \_\_\_\_/\_\_\_\_/\_\_\_\_

รหัส: \_\_\_\_\_

วัน      เดือน      ปี

|                                                                                                                                                                                  |                                                                                                                                                                                                                                                                                                                                |                                                                                    |
|----------------------------------------------------------------------------------------------------------------------------------------------------------------------------------|--------------------------------------------------------------------------------------------------------------------------------------------------------------------------------------------------------------------------------------------------------------------------------------------------------------------------------|------------------------------------------------------------------------------------|
| <p>46. อาการอดดอดไม่สบายท้องหรือปวดท้องนึ้นหรือหายสนทหลังจากทานถ่ายอจจาระ บอยมากนอยแคไหน</p> <p>ก) อาการอดดอดไม่สบายท้องหรือปวดท้องน แกลงหลังจากทานถ่ายอจจาระ บอยมากนอยแคไหน</p> | <p><input type="radio"/> ไม่เคยเกิดขึ้นหรือเกิดขึ้นน้อยครั้งมาก</p> <p>1 เกิดบางครั้ง</p> <p>2 เกิดบ่อยๆ</p> <p>3 เกิดเกือบทุกครั้ง</p> <p>4 เกิดทุกครั้ง</p><br><p><input type="radio"/> ไม่เคยเกิดขึ้นหรือเกิดขึ้นน้อยครั้งมาก</p> <p>1 เกิดบางครั้ง</p> <p>2 เกิดบ่อยๆ</p> <p>3 เกิดเกือบทุกครั้ง</p> <p>4 เกิดทุกครั้ง</p> |                                                                                    |
| <p>47. เมื่้อทานนมมี้อการรสกอดดอดไม่่สบายท้องหรือปวดท้องนทานมี้อการถ่ายอจจาระบอยมากชนหรือไม</p>                                                                                  | <p><input type="radio"/> ไม่เคยเกิดขึ้นหรือเกิดขึ้นน้อยครั้งมาก</p> <p>1 เกิดบางครั้ง</p> <p>2 เกิดบ่อยๆ</p> <p>3 เกิดเกือบทุกครั้ง</p> <p>4 เกิดทุกครั้ง</p>                                                                                                                                                                  | <p><input type="radio"/> คากามเขาใจาย</p> <p><input type="radio"/> ไมเขาใจากาม</p> |
| <p>48. เมื่้อทานนมมี้อการรสกอดดอดไม่่สบายท้องหรือปวดท้องนทานมี้อการถ่ายอจจาระนอยครงลงหรือไม</p>                                                                                  | <p><input type="radio"/> ไม่เคยเกิดขึ้นหรือเกิดขึ้นน้อยครั้งมาก</p> <p>1 เกิดบางครั้ง</p> <p>2 เกิดบ่อยๆ</p> <p>3 เกิดเกือบทุกครั้ง</p> <p>4 เกิดทุกครั้ง</p>                                                                                                                                                                  | <p><input type="radio"/> คากามเขาใจาย</p> <p><input type="radio"/> ไมเขาใจากาม</p> |
| <p>49. เมื่้อทานนมมี้อการรสกอดดอดไม่่สบายท้องหรือปวดท้องนทานถ่ายอจจาระลักษณะเหลวมากชนหรือไม</p>                                                                                  | <p><input type="radio"/> ไม่เคยเกิดขึ้นหรือเกิดขึ้นน้อยครั้งมาก</p> <p>1 เกิดบางครั้ง</p> <p>2 เกิดบ่อยๆ</p> <p>3 เกิดเกือบทุกครั้ง</p> <p>4 เกิดทุกครั้ง</p>                                                                                                                                                                  | <p><input type="radio"/> คากามเขาใจาย</p> <p><input type="radio"/> ไมเขาใจากาม</p> |
| <p>50. เมื่้อทานนมมี้อการรสกอดดอดไม่่สบายท้องหรือปวดท้องนทานถ่ายอจจาระลักษณะแข็งมากชน บอย</p>                                                                                    | <p><input type="radio"/> ไม่เคยเกิดขึ้นหรือเกิดขึ้นน้อยครั้งมาก</p> <p>1 เกิดบางครั้ง</p> <p>2 เกิดบ่อยๆ</p>                                                                                                                                                                                                                   | <p><input type="radio"/> คากามเขาใจาย</p> <p><input type="radio"/> ไมเขาใจากาม</p> |

# EAR3Q

วันที่: \_\_\_\_/\_\_\_\_/\_\_\_\_

รหัส: \_\_\_\_\_

วัน      เดือน      ปี

|                                                                                                                                                                                                     |                                                                                                                                                                                               |                                                                                       |
|-----------------------------------------------------------------------------------------------------------------------------------------------------------------------------------------------------|-----------------------------------------------------------------------------------------------------------------------------------------------------------------------------------------------|---------------------------------------------------------------------------------------|
|                                                                                                                                                                                                     | <p>3 เกือบทุกครั้ง</p> <p>4 เกดทุกครั้ง</p>                                                                                                                                                   |                                                                                       |
| <p>51. อาการปวดท้องหรือคอตรงไม่สบายท้องน<br/>สามารถดีขึ้นโดยการขยับตัวหรือเปลี่้ยันทาทาง<br/>บ่อย มากน้อยแค่ไหน</p> <p><b>*ทานอาจพักการตอบคำถามสัก 5 นาที<br/>ก่อนทำ การตอบคำถามต่อในข้อ 52</b></p> | <p><input type="radio"/> ไม่เคยเกิดขึ้นหรือเกิดขึ้นน้อยครั้งมาก</p> <p>1 เกดบางครั้ง</p> <p>2 เกดบ่อยๆ</p> <p>3 เกดเกือบทุกครั้ง</p> <p>4 เกดทุกครั้ง</p>                                     | <p><input type="radio"/> คางามเขาใจกาย</p> <p><input type="radio"/> ไม่เขาใจคางาม</p> |
| <p>52. ในช่วง 3 เดือนที่ผ่านมา<br/>บ่อยมากน้อยแค่ไหนที่ท่าน ถ่ายอุจจาระน้อยกว่า 3<br/>ครั้งต่อสัปดาห์ (0-2 ครั้งต่อ สัปดาห์)</p>                                                                    | <p><input type="radio"/> ไม่เคยเกิดขึ้นหรือเกิดขึ้นน้อยครั้งมาก</p> <p>1 เกดบางครั้ง</p> <p>2 เกดบ่อยๆ</p> <p>3 เกดเกือบทุกครั้ง</p> <p>4 เกดทุกครั้ง</p> <p>5 จาไม่ได้หรือยากที่จะบอกได้</p> | <p><input type="radio"/> คางามเขาใจกาย</p> <p><input type="radio"/> ไม่เขาใจคางาม</p> |
| <p>53. ในช่วง 3 เดือนที่ผ่านมา<br/>ท่านถ่ายอุจจาระปนก้อน แข็ง บ่อยมณ กากแค่ไหน</p>                                                                                                                  | <p><input type="radio"/> ไม่เคยเกิดขึ้นหรือเกิดขึ้นน้อยครั้งมาก</p> <p>1 เกดบางครั้ง</p> <p>2 เกดบ่อยๆ</p> <p>3 เกดเกือบทุกครั้ง</p> <p>4 เกดทุกครั้ง</p>                                     | <p><input type="radio"/> คางามเขาใจกาย</p> <p><input type="radio"/> ไม่เขาใจคางาม</p> |
| <p>54. ในช่วง 3 เดือนที่ผ่านมา<br/>ท่านตองเบงมาก<br/>ขณะถ่ายอุจจาระบ่อยมากน้อยแค่ไหน</p>                                                                                                            | <p><input type="radio"/> ไม่เคยเกิดขึ้นหรือเกิดขึ้นน้อยครั้งมาก</p> <p>1 เกดบางครั้ง</p> <p>2 เกดบ่อยๆ</p> <p>3 เกดเกือบทุกครั้ง</p> <p>4 เกดทุกครั้ง</p>                                     | <p><input type="radio"/> คางามเขาใจกาย</p> <p><input type="radio"/> ไม่เขาใจคางาม</p> |
| <p>55. ในช่วง 3 เดือนที่ผ่านมา<br/>ท่านรศกว่าถ่ายไม่สด<br/>หลังจากถ่ายอุจจาระบ่อยมากน้อยแค่ไหน</p>                                                                                                  | <p><input type="radio"/> ไม่เคยเกิดขึ้นหรือเกิดขึ้นน้อยครั้งมาก</p> <p>1 เกดบางครั้ง</p> <p>2 เกดบ่อยๆ</p>                                                                                    | <p><input type="radio"/> คางามเขาใจกาย</p> <p><input type="radio"/> ไม่เขาใจคางาม</p> |

# EAR3Q

วัน: \_\_\_\_/\_\_\_\_/\_\_\_\_

วัน      เดือน      ปี

รหัส: \_\_\_\_\_

|                                                                                                                                                                                                                                                                                                                                 |                                                                                                                                                                                                                                                                                                                                                                                                                                                                   |                                                                                       |
|---------------------------------------------------------------------------------------------------------------------------------------------------------------------------------------------------------------------------------------------------------------------------------------------------------------------------------|-------------------------------------------------------------------------------------------------------------------------------------------------------------------------------------------------------------------------------------------------------------------------------------------------------------------------------------------------------------------------------------------------------------------------------------------------------------------|---------------------------------------------------------------------------------------|
|                                                                                                                                                                                                                                                                                                                                 | <p>3 เกิดเกือบทุกครั้ง</p> <p>4 เกิดทุกครั้ง</p>                                                                                                                                                                                                                                                                                                                                                                                                                  |                                                                                       |
| <p>56. ในช่วง 3 เดือนที่ผ่านมา</p> <p>ท่านรู้สึกว่าไม่สามารถเบง อัจจระออกได้ (เช่น คลายมืออะไรคนอย) ขณะถ่าย อัจจระ บ่อยครั้งมากน้อยแค่ไหน</p> <p>ก) ท่านเบงอัจจระออกยาก เพราะเหตุใดดังต่อไปนี้</p> <p>ข) ท่านถ่ายอัจจระได้ยากเพราะเหตุต่อไปนี้หรือไม่</p>                                                                       | <p><input type="radio"/> ไม่เคยเกิดขึ้นหรือเกิดขึ้นน้อยครั้งมาก</p> <p>1 เกิดบางครั้ง</p> <p>2 เกิดบ่อยๆ</p> <p>3 เกิดเกือบทุกครั้ง</p> <p>4 เกิดทุกครั้ง</p><br><p>1 อัจจระใหญ่มากเกินไป</p> <p>2 อัจจระเล็ก/บางมากเกินไป</p> <p>3 อัจจระแข็งมากเกินไป</p> <p>4 อัจจระแหว่งมากเกินไป</p> <p>5 ไม่ใช่ทั้ง 4 ข้อข้างต้น</p><br><p>1 ไม่มีความรู้สึกปวดถ่ายอัจจระ</p> <p>2 ไม่มีแรงเบงอัจจระหรือมีแรงเบงน้อยไป</p> <p>3 สามารถเบงได้แต่มนติดหรือมีอะไรมาอุดกั้น</p> | <p><input type="radio"/> คางามเขาใจกาย</p> <p><input type="radio"/> ไม่เขาใจคางาม</p> |
| <p>57. ในช่วง 3 เดือนที่ผ่านมา</p> <p>บ่อยมากน้อยแค่ไหนที่</p> <p>ท่านต้องไชนวดคที่กนหรือรอบๆกน หรือต้องลง อัจจระออกมาเพื่อที่จะได้ถ่ายอัจจระได้</p> <p>ก) ในช่วง 3 เดือนที่ผ่านมา</p> <p>ท่านต้องไชนวดลงไปหรือ</p> <p>ทวารหนักเพื่อทำให้ถ่ายอัจจระได้หรือไม่</p> <p>ข) ในช่วง 3 เดือนที่ผ่านมา</p> <p>ท่านต้องฉดนาหรือทวาร</p> | <p><input type="radio"/> ไม่เคยเกิดขึ้นหรือเกิดขึ้นน้อยครั้งมาก</p> <p>1 เกิดบางครั้ง</p> <p>2 เกิดบ่อยๆ</p> <p>3 เกิดเกือบทุกครั้ง</p> <p>4 เกิดทุกครั้ง</p><br><p><input type="radio"/> ไม่ใช่</p> <p>1 ใช่</p><br><p><input type="radio"/> ไม่ใช่</p> <p>1 ใช่</p><br><p><input type="radio"/> ไม่ใช่                      1 ใช่</p>                                                                                                                           | <p><input type="radio"/> คางามเขาใจกาย</p> <p><input type="radio"/> ไม่เขาใจคางาม</p> |

# EAR3Q

วัน: \_\_\_\_ / \_\_\_\_ / \_\_\_\_

รหัส: \_\_\_\_\_

วัน      เดือน      ปี

|                                                                                                                                                                                     |                                                                                                                                                                                            |                                                                                                                |
|-------------------------------------------------------------------------------------------------------------------------------------------------------------------------------------|--------------------------------------------------------------------------------------------------------------------------------------------------------------------------------------------|----------------------------------------------------------------------------------------------------------------|
| <p>ง) ในช่วง 3 เดือนที่ผ่านมา<br/>ท่านต้องสวนยาระบายที่</p>                                                                                                                         | <p><input type="radio"/> ไม่ใช่<br/><input type="radio"/> ใช่</p>                                                                                                                          |                                                                                                                |
| <p>58. ในช่วง 3 เดือนที่ผ่านมา บ่อยครั้งมากน้อยแค่ไหนที่ท่านไม่สามารถจะเบ่งเพื่อให้อุจจาระออกมาได้ขณะถ่ายอุจจาระ</p>                                                                | <p><input type="radio"/> ไม่เคยเกิดขึ้นหรือเกิดขึ้นน้อยครั้งมาก<br/>1 เกิดบางครั้ง<br/>2 เกิดบ่อยๆ<br/>3 เกิดเกือบทุกครั้ง<br/>4 เกิดทุกครั้ง</p>                                          | <p><input type="radio"/> คางามเข้าใจง่าย<br/><input type="radio"/> ไม่เข้าใจคางาม</p>                          |
| <p>59. ท่านมีอาการท้องผูกตามข้อใดข้อหนึ่งของข้อ 52-58 โดยที่เรมมีอาการมานานมากกว่า 6 เดือน<br/>ใช่หรือไม่</p>                                                                       | <p><input type="radio"/> ไม่ใช่<br/><input type="radio"/> ใช่</p>                                                                                                                          | <p><input type="radio"/> คางามเข้าใจง่าย<br/><input type="radio"/> ไม่เข้าใจคางาม</p>                          |
| <p>60. ในช่วง 3 เดือนที่ผ่านมา ท่านถ่ายอุจจาระมากกว่า หรือเท่ากับ 4 ครั้งตอวัน บ่อยมากน้อยแค่ไหน</p>                                                                                | <p><input type="radio"/> ไม่เคยเกิดขึ้นหรือเกิดขึ้นน้อยครั้งมาก<br/>1 เกิดบางครั้ง<br/>2 เกิดบ่อยๆ<br/>3 เกิดเกือบทุกครั้ง<br/>4 เกิดตลอดเวลา<br/>5 ยากที่จะจำได้หรือยากที่จะตอบคางาม</p>  | <p><input type="radio"/> คางามเข้าใจง่าย<br/><input type="radio"/> ไม่เข้าใจคางาม</p>                          |
| <p>61. ในช่วง 3 เดือนที่ผ่านมา ท่านถ่ายอุจจาระเหลว และๆ หรือปนนา บ่อยมากน้อยแค่ไหน</p>                                                                                              | <p><input type="radio"/> ไม่เคยเกิดขึ้นหรือเกิดขึ้นน้อยครั้งมาก→→→<br/>1 เกิดบางครั้ง<br/>2 เกิดบ่อยๆ<br/>3 เกิดเกือบทุกครั้ง<br/>4 เกิดทุกครั้ง</p>                                       | <p><b>ข้ามไปทาขอ 63</b><br/><input type="radio"/> คางามเข้าใจง่าย<br/><input type="radio"/> ไม่เข้าใจคางาม</p> |
| <p>62. ในช่วง 3 เดือนที่ผ่านมา ท่านถ่ายอุจจาระลักษณะ เหลว และๆ หรือปนนาอย่างน้อย ¼ ของการถ่าย อุจจาระทั้งหมด<br/>ใช่หรือไม่<br/>ก) ท่านรศกวาการขับถ่ายอุจจาระของท่านเป็นอย่างไร</p> | <p><input type="radio"/> ไม่ใช่<br/><input type="radio"/> ใช่<br/>2 ยากที่จะบอกได้<br/><br/>1 ทองผก<br/>2 ทองเสี๋ย<br/>3 บางครั้งทองผกและบางครั้งทองเสี๋ย<br/>4 ไม่ตรงตามขอใดข้างตนเลย</p> | <p><input type="radio"/> คางามเข้าใจง่าย<br/><input type="radio"/> ไม่เข้าใจคางาม</p>                          |

# EAR3Q

วันที่: \_\_\_\_/\_\_\_\_/\_\_\_\_

วัน      เดือน      ปี

รหัส: \_\_\_\_\_

|                                                                                                                                                                                                                                                                                                                                                                                                                                                                                                                                                                                                                                                                                 |                                                                                                                                                                                                                       |                                                                                     |
|---------------------------------------------------------------------------------------------------------------------------------------------------------------------------------------------------------------------------------------------------------------------------------------------------------------------------------------------------------------------------------------------------------------------------------------------------------------------------------------------------------------------------------------------------------------------------------------------------------------------------------------------------------------------------------|-----------------------------------------------------------------------------------------------------------------------------------------------------------------------------------------------------------------------|-------------------------------------------------------------------------------------|
| <p>ข) โดยเฉลี่ย ทานถ่ายอุจจาระครั้งต่อสัปดาห์</p> <p>_____ ครั้ง/สัปดาห์</p> <p>*ค) อุจจาระที่ทานถ่ายออกมาตามปกติมีลักษณะเป็นแบบไหนเมื่อ ทานรสกปกติ</p> <p>BSS no. _____</p> <p>*ง) อุจจาระที่ทานถ่ายออกมาตามปกติมีลักษณะเป็นแบบไหนเมื่อทานทองผก</p> <p>BSS no. _____</p> <p>*จ) อุจจาระที่ทานถ่ายออกมาตามปกติมีลักษณะเป็นแบบไหนเมื่อทานทองเสี</p> <p>BSS no. _____</p> <p>*ฉ) อุจจาระที่ทานถ่ายออกมาตามปกติส่วนใหญ่มีลักษณะเป็นแบบไหน</p> <p>BSS no. _____</p> <p>*ช) อุจจาระที่ทานถ่ายออกมาตามปกติมีลักษณะเป็นแบบไหนเมื่อรสกแยที่่สุด</p> <p>BSS no. _____</p> <p>*ให้ดูตามรูป Bristol Stool Scale จากรูปขวามื่อแล้ว</p> <p>เลือกตัวเลขให้ตรงกับลักษณะอุจจาระที่ถ่ายออกมา</p> | <div style="text-align: center;"> 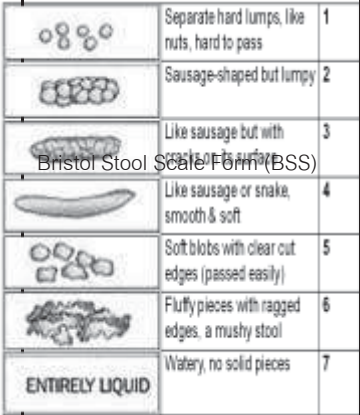 <p>Bristol Stool Scale Form (BSS)</p> </div>                                                    |                                                                                     |
| <p>63. ใน 3 เดือนที่ผ่านมา</p> <p>ทานต่อเขาของนาอย่างแรงรบ</p> <p>เพื่อถ่ายอุจจาระบ่อยมากนอยแคไหน</p> <p>ก. อาการที่ตองรบเขาของนา เพื่อถ่ายอุจจาระ</p> <p>มกเกิดชน ตอนไหน</p>                                                                                                                                                                                                                                                                                                                                                                                                                                                                                                   | <p><input type="radio"/> ไม่เคยเกิดชนหรือเกิดชนนอยครงมก</p> <p>1 เกิดบางครั้ง</p> <p>2 เกิดบ่อยๆ</p> <p>3 เกิดเกือบทกครง</p> <p>4 เกิดทกครง</p> <p>1 หลงรบประทานอาหาร</p> <p>2 เมื่อรสกแน่นทองหรือทองอืด</p> <p>3</p> | <p><input type="radio"/> คาถามเขาใจาย</p> <p><input type="radio"/> ไมเขาใจคาถาม</p> |

เมื่อมีอาการปวดท้องบริเวณลนป

4 เมื่อทานวิตกกงวลหรือเครยด

# EAR3Q

วันที่: \_\_\_\_/\_\_\_\_/\_\_\_\_

วัน      เดือน      ปี

รหัส: \_\_\_\_\_

|                                                                                                                                                                                                                                                                                                              |                                                                                                                                                                                                                                                              |                                                                                                                                                                                                     |
|--------------------------------------------------------------------------------------------------------------------------------------------------------------------------------------------------------------------------------------------------------------------------------------------------------------|--------------------------------------------------------------------------------------------------------------------------------------------------------------------------------------------------------------------------------------------------------------|-----------------------------------------------------------------------------------------------------------------------------------------------------------------------------------------------------|
| <p>ข. ท่านจะให้ความรุนแรงของอาการที่ต้องรบเราหงอนา<br/>อย่างไร</p>                                                                                                                                                                                                                                           | <p>1 มีอาการเล็กน้อยมาก<br/>2 มีอาการเล็กน้อย<br/>3 มีอาการปานกลาง<br/>4 มีอาการรุนแรง<br/>5 มีอาการรุนแรงมาก</p>                                                                                                                                            |                                                                                                                                                                                                     |
| <p>64. ท่านเริ่มมีอาการถ่ายอุจจาระปนลักษณะเหลว<br/>และๆ หรือเป็นนา นานมากกว่า 6 เดือน ใช่หรือไม่</p>                                                                                                                                                                                                         | <p><input type="radio"/> ไม่ใช่<br/><input type="radio"/> ใช่</p>                                                                                                                                                                                            | <p><input type="radio"/> คาดถามเขาใจาย<br/><input type="radio"/> ไม่เขาใจคาถาม</p>                                                                                                                  |
| <p>65. ในช่วง 3 เดือนที่ผ่านมา<br/>ท่านถ่ายอุจจาระมีมึก หรือเมื่อกปน<br/>บ่อยมากน้อยแค่ไหน</p>                                                                                                                                                                                                               | <p><input type="radio"/> ไม่เคยเกิดขึ้นหรือเกิดขึ้นน้อยครั้งมาก<br/>1 เกิดบางครั้ง<br/>2 เกิดบ่อยๆ<br/>3 เกิดเกือบทุกครั้ง<br/>4 เกิดทุกครั้ง</p>                                                                                                            | <p><input type="radio"/> คาดถามเขาใจาย<br/><input type="radio"/> ไม่เขาใจคาถาม</p>                                                                                                                  |
| <p>66. ในช่วง 3 เดือนที่ผ่านมา<br/>ท่านมีอาการท้องอืดหรือ ท้องโตหรือปองขึ้น<br/>บ่อยมากน้อยแค่ไหน</p> <p>ก) โปรดระบตาแหน่งที่ท่านรอกของอืดหรือของ<br/>โตชน ในรปदानขวา<br/>ถาทานมีอาการมากกว่า หนึ่งตาแหน่ง<br/>ให้ระบตาแหน่งที่มีอาการ<br/>รบกวนทานมากที่สุด</p> <p>ข)<br/>อาการท้องอืดหรือท้องโตชนคือชน</p> | <p><input type="radio"/> ไม่เคย      →→→→→<br/>1 นอยกว่า 1 วันต่อเดือน<br/>2 หนึ่งวันต่อเดือน<br/>3 สองถึงสามวันต่อเดือน<br/>4 หนึ่งวันต่อสပါတา<br/>5 มากกว่า 1 วันต่อสပါတา<br/>6 ทกวน</p> <p><input type="radio"/> ไม่ใช่<br/><input type="radio"/> ใช่</p> | <p><b>ขามไปทาขอ 68</b></p> <p><input type="radio"/> คาดถามเขาใจาย<br/><input type="radio"/> ไม่เขาใจคาถาม</p> 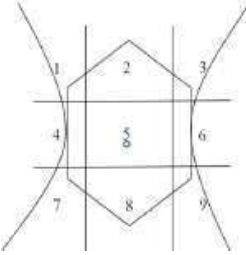 |

# EAR3Q

วัน: \_\_\_\_ / \_\_\_\_ / \_\_\_\_

วัน      เดือน      ปี

รหัส: \_\_\_\_\_

|                                                                                                                                               |                                                                                                                                                                                                    |                                                                                                                   |
|-----------------------------------------------------------------------------------------------------------------------------------------------|----------------------------------------------------------------------------------------------------------------------------------------------------------------------------------------------------|-------------------------------------------------------------------------------------------------------------------|
| <p>ก) อาการท้องอืดหรือท้องโตจนสมพนธกบการถ่ายอุจจาระที่บ่อยขึ้นหรือน้อยครั้งลงหรือไม่</p>                                                      | <p><input type="radio"/> ไม่ใช่</p> <p><input type="radio"/> ใช่</p>                                                                                                                               |                                                                                                                   |
| <p>67. ท่านเริ่มมีอาการท้องอืดหรือท้องโตมากจนมานานกว่า 6 เดือนหรือไม่</p>                                                                     | <p><input type="radio"/> ไม่ใช่</p> <p><input type="radio"/> ใช่</p>                                                                                                                               | <p><input type="radio"/> คาดถามเขาใจกาย</p> <p><input type="radio"/> ไม่เขาใจคาถาม</p>                            |
| <p>68. ในช่วง 6 เดือนที่ผ่านมา ท่านมีอาการปวดท้อง (ที่ปวดตอเนองขวงระยะเวลาหนึ่ง) ที่บริเวณกลางทงดานบนหรือดานขวาบนของช่องทง บอยมากนอยแคไหน</p> | <p><input type="radio"/> ไม่เคย      →→→→→</p> <p>1 นอยกว่า 1 วนตอเดือน</p> <p>2 หนึ่งวนตอเดือน</p> <p>3 สองถึงสามวนตอเดือน</p> <p>4 หนึ่งวนตอสปดาห</p> <p>5 มากกว่า 1 วนตอสปดาห</p> <p>6 ทกวน</p> | <p><b>ขามไปทาชอ 75</b></p> <p><input type="radio"/> คาดถามเขาใจกาย</p> <p><input type="radio"/> ไม่เขาใจคาถาม</p> |
| <p>ก) โปรตระบบตาแห่งที่ทานรสกปวดในรปดานขวา ถาทานมีอาการมากกว่าหนึ่งตาแห่ง</p> <p>โหระบตาแห่งที่มีอาการรบกวนทานมากที่สุด</p>                   |                                                                                                                                                                                                    | 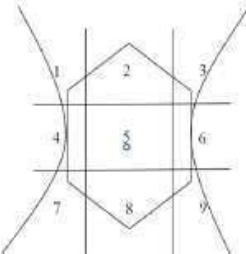                             |
| <p>69. อาการปวดทงน เปนครงหนึ่งนานมากกว่าหรือเทาภ 30 นาทีหรือไม่</p>                                                                           | <p><input type="radio"/> ไม่เคยเกดขนหรือเกดขนนอยครงมาก</p> <p>1 เกดบางครง</p> <p>2 เกดบอยๆ</p> <p>3 เกดเกอบทกครง</p> <p>4 เกดทกครง</p>                                                             | <p><input type="radio"/> คาดถามเขาใจกาย</p> <p><input type="radio"/> ไม่เขาใจคาถาม</p>                            |

# EAR3Q

วัน: \_\_\_\_/\_\_\_\_/\_\_\_\_

วัน      เดือน      ปี

รหัส: \_\_\_\_\_

|                                                                                                                          |                                                                                                                                   |                                                                                                  |
|--------------------------------------------------------------------------------------------------------------------------|-----------------------------------------------------------------------------------------------------------------------------------|--------------------------------------------------------------------------------------------------|
| 70. อาการปวดท้องน จะปวดเพิ่่มจนจนค้งที่<br>ที่ระคคความ ปวดที่ร่นแรง ไซหรือไม                                             | <input type="radio"/> ไม่เคยเกิดชนหรือเกิดชนนอยค้งมาก<br>1 เกิดบางค้ง<br>2 เกิดบอยๆ<br>3 เกิดเกอบทคค้ง<br>4 เกิดทคค้ง             | <input type="radio"/> คากามเขาใจกาย<br><input type="radio"/> ไมเขาใจคากาม                        |
| 71. อาการปวดท้องนเปนๆหายๆ และจะหายปวด<br>สนทในชวงเวลาระหวางการเกิดอาการปวดแต่ละ<br>ค้ง ไซหรือไม                          | <input type="radio"/> ไม่เคยเกิดชนหรือเกิดชนนอยค้งมาก<br>1 เกิดบางค้ง<br>2 เกิดบอยๆ<br>3 เกิดเกอบทคค้ง<br>4 เกิดทคค้ง             | <input type="radio"/> คากามเขาใจกาย<br><input type="radio"/> ไมเขาใจคากาม                        |
| 72. อาการปวดท้องน ทาโหนตองหยดการทา<br>กจกรรมตางๆ หรือเปนเหตุโหนตองไปพบแพทยอยาง<br>รบควนหรือตองไปหาแพทยที่หองจกเจนนหรือไม | <input type="radio"/> ไม่เคยเกิดชนหรือเกิดชนนอยค้งมาก<br>1 เกิดบางค้ง<br>2 เกิดบอยๆ<br>3 เกิดเกอบทคค้ง<br>4 เกิดทคค้ง             | <input type="radio"/> คากามเขาใจกาย<br><input type="radio"/> ไมเขาใจคากาม                        |
| 73. ทานไดรบการม่่าตดเอาถนาคีออกแลวไซหรือไม                                                                               | <input type="radio"/> ไมไซ                      →→→→→→<br>1 ไซ                                                                    | <b>ขามไปทาขอ 75</b><br><input type="radio"/> คากามเขาใจกาย<br><input type="radio"/> ไมเขาใจคากาม |
| 74. ทานมีอาการปวดท้องน<br>บอยมากนอยแคไหน<br>หลงไดรบการม่่าตดเอาถนาคีออกไป                                                | <input type="radio"/> ไม่เคยเกิดชนหรือเกิดชนนอยค้งมาก<br>1 เกิดบางค้ง<br>2 เกิดบอยๆ<br>3 เกิดเกอบทคค้ง<br>4 เกิดทคค้ง             | <input type="radio"/> คากามเขาใจกาย<br><input type="radio"/> ไมเขาใจคากาม                        |
| 75. ทานถรบกวนโดยอาการมายลมชองทาน มากนอย<br>แคไหน                                                                         | <input type="radio"/> ไม่เคยเกิดชนหรือเกิดชนนอยค้งมาก<br>1 เกิดบางค้ง<br>2 เกิดบอยๆ<br>3 เกิดเปนสวณใหญู่ชองเวลา<br>4 เกิดตลอดเวลา | <input type="radio"/> คากามเขาใจกาย<br><input type="radio"/> ไมเขาใจคากาม                        |



# EAR3Q

วัน: \_\_\_\_/\_\_\_\_/\_\_\_\_

รหัส: \_\_\_\_\_

วัน      เดือน      ปี

|                                                                                                                                                |                                                                                                                                                                                                 |                                                                                                                 |
|------------------------------------------------------------------------------------------------------------------------------------------------|-------------------------------------------------------------------------------------------------------------------------------------------------------------------------------------------------|-----------------------------------------------------------------------------------------------------------------|
| <p>76. ทานมึ้อากการกลนลมที่จ้ะผายออกทางทวารหนักไม่ได้หรือไม</p>                                                                                | <p><input type="radio"/> ไม่เคยเกิดขึ้นหรือเกิดขึ้นน้อยครั้งมาก</p> <p>1 เกิดบางครั้งที่ผายลม</p> <p>2 เกิดบ่อยๆ</p> <p>3 เกิดเกือบทุกครั้งที่ผายลม</p> <p>4 เกิดทุกครั้งที่ผายลม</p>           | <p><input type="radio"/> คากามเขาใจกาย</p> <p><input type="radio"/> ไมเขาใจคากาม</p>                            |
| <p>77. ในซวง 3 เดือนที่ผ่านมา ทานมึ้อากการอจจระที่เปนนารอคอนเล็ดออกมากโดยไมตงใจหรือไม</p>                                                      | <p><input type="radio"/> ไมเคย      →→→→</p> <p>1 นอยกว่า 1 วนตอเดือน</p> <p>2 หนึ่งวนตอเดือน</p> <p>3 สอถึงสามวนตอเดือน</p> <p>4 หนึ่งวนตอสปดาห</p> <p>5 มากกว่า 1 วนตอสปดาห</p> <p>6 ทกวน</p> | <p><b>ซามไปทาซอ 80</b></p> <p><input type="radio"/> คากามเขาใจกาย</p> <p><input type="radio"/> ไมเขาใจคากาม</p> |
| <p>78. ในซวง 3 เดือนที่ผ่านมา เมื้ออเกิดอจจระเล็ดปรมาณอจจระที่เล็ดออกมามีมากนอยเทาใด</p>                                                       | <p>1 ปรมาณเล็กนอย (พอเปอนทางเกงเทานน)</p> <p>2 ปรมาณปานกลาง (มากกว่าเปอนทางเกง แตนนอยกว่าปรมาณอจจระที่ถ่ายตามปกติ)</p> <p>3 ปรมาณมาก (ปรมาณเทาบกการถ่ายอจจระปกติ ครงหนึ่ง)</p>                  | <p><input type="radio"/> คากามเขาใจกาย</p> <p><input type="radio"/> ไมเขาใจคากาม</p>                            |
| <p>79. ใน 1 ปที่ผ่านมา เมื้ออทานมึ้อจจระเล็ดลักษณะอจจระที่เล็ดมสวนประกอบเปนอนอยางไร</p>                                                        | <p>1 เหลว/เปนมึ้ออกอยางเดียว</p> <p>2 เปนเนอจจระอยางเดียว</p> <p>3 รวมกนทงเหลว/มกและเปนเนอจจระ</p>                                                                                              | <p><input type="radio"/> คากามเขาใจกาย</p> <p><input type="radio"/> ไมเขาใจคากาม</p>                            |
| <p>80. ในซวง 3 เดือนที่ผ่านมา บอยมากนอยแคไหนที่ทาน มึ้อากการเจ็บ ปวดหรือเน่นคลายมึ้อะไรกตบรเวณรฐทวารหนักหรือทวารหนักในซงเวลาที่ไมถ่ายอจจระ</p> | <p><input type="radio"/> ไมเคย      →→→→</p> <p>1 นอยกว่า 1 วนตอเดือน</p> <p>2 หนึ่งวนตอเดือน</p> <p>3 สอถึงสามวนตอเดือน</p> <p>4 หนึ่งวนตอสปดาห</p> <p>5 มากกว่า 1 วนตอสปดาห</p> <p>6 ทกวน</p> | <p><b>ซามไปทาซอ 84</b></p> <p><input type="radio"/> คากามเขาใจกาย</p> <p><input type="radio"/> ไมเขาใจคากาม</p> |

# EAR3Q

วันที่: \_\_\_\_/\_\_\_\_/\_\_\_\_

รหัส: \_\_\_\_\_

วัน      เดือน      ปี

|                                                                                                                                             |                                                                                                                                                                         |                                                                                       |
|---------------------------------------------------------------------------------------------------------------------------------------------|-------------------------------------------------------------------------------------------------------------------------------------------------------------------------|---------------------------------------------------------------------------------------|
| <p>81. เมื่อท่านมีอาการเจ็บ ปวด หรือแน่นคล้ายมีอะไรกด</p> <p style="font-size: small;">บริเวณรูทวารหนักหรือทวารหนักและไปโดยบริเวณทวารใด</p> | <p>1 นานตั้งแต่วินาทีจนถึง 20 นาทีแล้วหายสนิท</p> <p>2 นานมากกว่า 20 นาทีจนถึงหลายๆวันหรือนานกว่านั้น</p>                                                               | <p><input type="radio"/> คางามเขาใจกาย</p> <p><input type="radio"/> ไม่เขาใจคางาม</p> |
| <p>82. อาการเจ็บหรือปวดบริเวณรูทวารหนักหรือทวารหนัก น เกิดขึ้นและหายสนิทในคนเดียวกนนน ไชหรือไม่</p>                                         | <p><input type="radio"/> ไม่ใช่</p> <p>1 ไช</p>                                                                                                                         | <p><input type="radio"/> คางามเขาใจกาย</p> <p><input type="radio"/> ไม่เขาใจคางาม</p> |
| <p>83. ท่านมีอาการเจ็บ ปวด หรือแน่นคล้ายอะไรกด บริเวณรูทวารหนักหรือทวารหนักน เรมเป็นมานานมา กวา 6 เดือนไชหรือไม่</p>                        | <p><input type="radio"/> ไม่ใช่</p> <p>1 ไช</p>                                                                                                                         | <p><input type="radio"/> คางามเขาใจกาย</p> <p><input type="radio"/> ไม่เขาใจคางาม</p> |
| <p>84. ในช่วง 3 เดือนที่ผ่านมา บอยมากนอยแคไหนที่ ท่านมีอาการเสียงแหบที่เป็นอยตลอดเวลาหรือแ ย ลง</p>                                         | <p><input type="radio"/> ไม่เคยเกิดขึ้นหรือเกิดขึ้นนอยครงมาก</p> <p>1 เกิดบางครั้ง</p> <p>2 เกิดบอยๆ</p> <p>3 เกิดเกือบตลอดเวลา</p> <p>4 เกิดตลอดเวลา</p>               | <p><input type="radio"/> คางามเขาใจกาย</p> <p><input type="radio"/> ไม่เขาใจคางาม</p> |
| <p>85. ในช่วง 3 เดือนที่ผ่านมา บอยมากนอยแคไหนที่ ไหนที่ท่านมีอาการเจ็บที่คอหรือในลาคอที่ เป็นอยตลอดเวลาหรือแยลง</p>                         | <p><input type="radio"/> ไม่เคยเกิดขึ้นหรือเกิดขึ้นนอยครงมาก</p> <p>1 เกิดบางครั้ง</p> <p>2 เกิดบอยๆ</p> <p>3 เกิดเกือบตลอดเวลา</p> <p>4 เกิดตลอดเวลา</p>               | <p><input type="radio"/> คางามเขาใจกาย</p> <p><input type="radio"/> ไม่เขาใจคางาม</p> |
| <p>86. ในช่วง 3 เดือนที่ผ่านมา บอยมากนอยแคไหนที่ ท่านมีอาการเจ็บหนอกขณะออกแรง หรืออาการเจ็บ หนอกที่เกยวของกบโรคหัวใจ</p>                    | <p><input type="radio"/> ไม่เคยเกิดขึ้นหรือเกิดขึ้นนอยครงมาก</p> <p>1 เกิดบางครั้ง</p> <p>2 เกิดบอยๆ</p> <p>3 เกิดเกือบทครงที่้อออกแรง</p> <p>4 เกิดทครงที่้อออกแรง</p> | <p><input type="radio"/> คางามเขาใจกาย</p> <p><input type="radio"/> ไม่เขาใจคางาม</p> |
| <p>87. ในช่วง 3 เดือนที่ผ่านมา ท่านมีอาการกลืน ลาบาก บอยมากนอยแคไหน</p>                                                                     | <p><input type="radio"/> ไม่เคยเกิดขึ้นหรือเกิดขึ้นนอยครงมาก</p> <p>1 เกิดบางครั้ง</p> <p>2 เกิดบอยๆ</p> <p>3 เกิดเกือบทครงที่้อกลืน      4 เกิดทครงที่้อกลืน</p>       | <p><input type="radio"/> คางามเขาใจกาย</p> <p><input type="radio"/> ไม่เขาใจคางาม</p> |

# EAR3Q

วันที่ \_\_\_\_ / \_\_\_\_ / \_\_\_\_  
วัน      เดือน      ปี

รหัส: \_\_\_\_\_

|                                                                                                                                       |                                                                                                                                                                                                                                                                                                                                                                                                            |                                                                                        |
|---------------------------------------------------------------------------------------------------------------------------------------|------------------------------------------------------------------------------------------------------------------------------------------------------------------------------------------------------------------------------------------------------------------------------------------------------------------------------------------------------------------------------------------------------------|----------------------------------------------------------------------------------------|
| <p>88.<br/>         ท่านมีความพอใจต่อการพบแพทย์ในอดีตที่ผ่านมา เนื่องจากปัญหาเกี่ยวกับอาการที่ปรากฏในแบบสอบถามรอบก่อนท่าน หรือไม่</p> | <ol style="list-style-type: none"> <li>1. พอใจ</li> <li>2. ไม่พอใจ เพราะแพทย์ไม่สนใจอาการที่ฉันบอกเล่าให้ฟัง</li> <li>3. ไม่พอใจเพราะแพทย์ไม่อธิบายให้ฉันเข้าใจอย่างเพียงพอ</li> <li>4. ไม่พอใจเพราะแพทย์ไม่ส่งตรวจทางห้องปฏิบัติการหรือการตรวจพิเศษต่างๆ อย่างเพียงพอ</li> <li>5. ฉันไม่เคยพบแพทย์เกี่ยวกับอาการที่ปรากฏในแบบสอบถามเลย</li> <li>6. ไม่พอใจ เพราะการรักษาที่ได้ไม่มีประสิทธิภาพ</li> </ol> | <p><input type="radio"/> ค่อนข้างใจหาย</p> <p><input type="radio"/> ไม่เข้าใจคำถาม</p> |
|---------------------------------------------------------------------------------------------------------------------------------------|------------------------------------------------------------------------------------------------------------------------------------------------------------------------------------------------------------------------------------------------------------------------------------------------------------------------------------------------------------------------------------------------------------|----------------------------------------------------------------------------------------|

## Supplementary Table 8

Questions from the R3DQ that were enhanced and adapted in the EAR3Q.

| R3DQ Q No. | Original question in R3DQ                                                | Enhancement in EAR3Q                                                                                                                                           | Rationale                                                                                                                                                                                                                                                                                             |
|------------|--------------------------------------------------------------------------|----------------------------------------------------------------------------------------------------------------------------------------------------------------|-------------------------------------------------------------------------------------------------------------------------------------------------------------------------------------------------------------------------------------------------------------------------------------------------------|
| 3          | Does this feeling occur between meals (when you are not eating)?         | 3a. Does this feeling occur in relation to meals?<br><br>3b. Usually how severe was this feeling?                                                              | This question relates to globus which was described in RD3Q as 'a feeling of a lump, fullness or something stuck in your throat'. This question was ambiguous as it could be interpreted to refer to dysphagia. Therefore, clarifying questions were added to define the timing in relation to meals. |
| 4          | When you are eating or drinking, does it hurt to swallow?                | 4. When you are eating or drinking does it hurt to swallow?<br><br>a. When you are eating or drinking, is there feeling of pain or discomfort when swallowing? | Relating to odynophagia, it was felt that Asians may not understand the meaning of 'hurt', and it was decided to add a modified question asking specifically whether there is a feeling of pain or discomfort when swallowing.                                                                        |
| 14         | Have you had this uncomfortable fullness after meals 6 months or longer? | Have you had this uncomfortable fullness after meals 6 months or longer?<br><br>a. Is this uncomfortable fullness related                                      | Relating to fullness after meals, it was proposed to add questions to describe                                                                                                                                                                                                                        |

to meal?

- 1 Yes, after a large meal
- 2 Yes, after a regular meal
- 3 Yes, after a small meal

the symptom in more detail so as to test the hypothesis that some patients may

misinterpret bloating as fullness, and that some patients with IBS may report bloating as fullness either because the distension was felt in the upper abdomen, or because the distension developed after a meal.

b. Usually, where is this uncomfortable fullness located?

- 1 Upper abdomen
- 2 Lower abdomen
- 3 Around your belly button
- 4 Whole of abdomen
- 5 Chest

c. Indicate in the diagram on the right where the uncomfortable fullness is located. If you have more than one location, indicate only the one that bothers you the most.

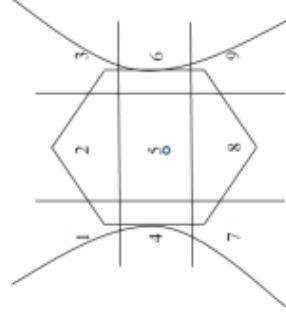

d. How do you get most relief from your fullness?

- 1 by passing stool
- 2 by passing flatus
- 3 both
- 4 none
- 5 belching

e. How do you define the severity of your fullness?

- 1 Very mild
- 2 Mild
- 3 Moderate
- 4 Severe
- 5 Very severe

f. During abdominal fullness do you have

- 0 No

- 17
- In the last 3 months, how often do you have pain or burning in the middle of your abdomen, above your belly button but not in your chest?
- 0 Never →→→ **Skip to question 26**
- 1 Less than one day a month
- 2 One day a month
- 3 Two to three days a month
- 4 One day a week
- 5 More than one day a week
- 6 Every day
- Relating to epigastric pain or burning, was considered to be ambiguous in its wording. A diagram was added to allow subjects to point to the exact site of the pain, ie whether this was in fact in the epigastrium or not.

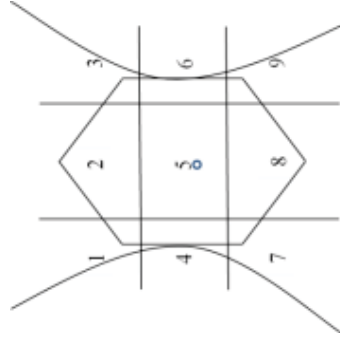

a. Indicate in the diagram on the right, the location of this pain or burning. If you have more than one location, indicate only the one that bothers you the most.

- b. Did you have
- 1 Pain only
- 2 Burning only
- 3 Pain and burning
- 0 Never or rarely
- 1 Sometimes
- 2 Often
- 3 Most of the time
- 4 Always
- Enquired about the relation of epigastric pain to passing of stool or gas, was considered to be an important Asian perspective as

- 23
- Did this pain or burning usually get better or stop after a bowel movement or passing gas?
- 0 Never or rarely
- 1 Sometimes
- 2 Often
- 3 Most of the time
- 4 Always

|    |                                                                                         |                                                                                                                                                                                                                                                                                                                                                                                                                                                                                                             |                                                                                                                                                                                                                                                                                                                                                                                                    |                                                                                                                                                                                                                   |
|----|-----------------------------------------------------------------------------------------|-------------------------------------------------------------------------------------------------------------------------------------------------------------------------------------------------------------------------------------------------------------------------------------------------------------------------------------------------------------------------------------------------------------------------------------------------------------------------------------------------------------|----------------------------------------------------------------------------------------------------------------------------------------------------------------------------------------------------------------------------------------------------------------------------------------------------------------------------------------------------------------------------------------------------|-------------------------------------------------------------------------------------------------------------------------------------------------------------------------------------------------------------------|
| 40 | <p>Did this bothersome belching start more than 6 months ago?</p> <p>0 No<br/>1 Yes</p> | <p>Did this pain or burning get better after a bowel movement or passing gas?</p> <p>0 No<br/>1 After bowel movement<br/>2 After passing gas<br/>3 Both</p> <p>b. Did this pain or burning get worse after bowel movement or passing gas?</p> <p>0 No<br/>1 After bowel movement<br/>2 After passing gas<br/>3 Both</p>                                                                                                                                                                                     | <p>previous surveys, as well as our clinical encounters, suggests that patients in Asia with IBS, frequently experience pain referred to the epigastrium. Thus, additional questions were asked to determine its association with bowel movement or passing gas. Enquired about belching, was expanded to describe its association with meals, test its association with IBS, and acid reflux.</p> |                                                                                                                                                                                                                   |
| 40 | <p>Did this bothersome belching start more than 6 months ago?</p> <p>0 No<br/>1 Yes</p> | <p>a. Did this bothersome belching start more than 6 months ago?</p> <p>0 No<br/>1 Yes</p> <p>b. Do you have belching before meals?</p> <p>0 No<br/>1 Yes</p> <p>c. Do you have belching during meals?</p> <p>0 No<br/>1 Yes</p> <p>d. Do you have belching unrelated to meals?</p> <p>0 No<br/>1 Yes</p> <p>e. Usually how severe was the belching?</p> <p>1 Very mild<br/>2 Mild<br/>3 Moderate<br/>4 Severe<br/>5 Very severe</p> <p>f. Did this belching usually get better</p> <p>1 Bowel movement</p> | <p>0 No<br/>1 Yes</p> <p>1 Very mild<br/>2 Mild<br/>3 Moderate<br/>4 Severe<br/>5 Very severe</p> <p>1 Bowel movement</p>                                                                                                                                                                                  | <p>0 No<br/>1 Yes</p> <p>1 Very mild<br/>2 Mild<br/>3 Moderate<br/>4 Severe<br/>5 Very severe</p> <p>1 Bowel movement</p> |

- 2 Passing flatus
  - 3 Eating
- 1 Bloating
  - 2 Abdominal pain
  - 3 Heartburn
  - 4 Bringing up of food into the mouth
  - 5 Bringing up of liquid into the mouth
- 1 Meals
  - 2 Passing flatus
  - 3 After bowel movement
  - 4 Antacids or medications to reduce stomach acid
  - 5 None of the above
- 0 Never → → → **Skip to question 52**
- 1 Less than one day a month
  - 2 One day a month
  - 3 Two to three days a month
  - 4 One day a week
  - 5 More than one day a week
  - 6 Every day

41

after

g. Did belching occur at the same time with

h. Is your belching relieved with

In the last 3 months, how often did you have discomfort or pain anywhere in your abdomen?

In the last 3 months, how often did you have discomfort or pain anywhere in your abdomen?

- 0 Never → → → **Skip to question 52**
- 1 Less than one day a month
  - 2 One day a month
  - 3 Two to three days a month
  - 4 One day a week
  - 5 More than one day a week
  - 6 Every day

41

a. Indicate in the diagram on the right,

Enquired about abdominal pain, a diagram of the abdominal quadrants was added to record the specific location of abdominal pain; this was to verify our perception that substantial numbers of patients with IBS present with upper abdominal pain.



the location of this pain. If you have more than one location, indicate only the one that bothers you the most.

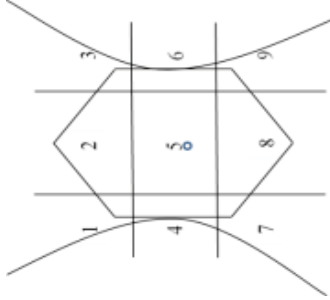

|    |                                                                                          |                                                                                                                                                         |                                                                                              |                                                                                                                                                         |                                                                                                                                                                                                   |
|----|------------------------------------------------------------------------------------------|---------------------------------------------------------------------------------------------------------------------------------------------------------|----------------------------------------------------------------------------------------------|---------------------------------------------------------------------------------------------------------------------------------------------------------|---------------------------------------------------------------------------------------------------------------------------------------------------------------------------------------------------|
| 42 | Did you only have pain (not discomfort or a mixture of discomfort and pain)?             | <ul style="list-style-type: none"> <li>0 Never or rarely</li> <li>1 Sometimes</li> <li>2 Often</li> <li>3 Most of the time</li> <li>4 Always</li> </ul> | Did you only have pain (not discomfort or a mixture of discomfort and pain)?                 | <ul style="list-style-type: none"> <li>0 Never or rarely</li> <li>1 Sometimes</li> <li>2 Often</li> <li>3 Most of the time</li> <li>4 Always</li> </ul> | To identify patients presenting specifically with abdominal pain as opposed to abdominal discomfort, a question was added to cater to patients who had either pain only, discomfort only or both. |
| 46 | How often did this discomfort or pain get better or stop after you had a bowel movement? | <ul style="list-style-type: none"> <li>0 Never or rarely</li> <li>1 Sometimes</li> <li>2 Often</li> <li>3 Most of the time</li> <li>4 Always</li> </ul> | 46. How often did this discomfort or pain get better or stop after you had a bowel movement? | <ul style="list-style-type: none"> <li>0 Never or rarely</li> <li>1 Sometimes</li> <li>2 Often</li> <li>3 Most of the time</li> <li>4 Always</li> </ul> | To determine association of abdominal pain with bowel movement; a question was added to identify patients who experienced increasing pain after bowel movement.                                   |
| 56 | In the last 3 months, how often did                                                      | 0 Never or rarely                                                                                                                                       | In the last 3 months, how often did you                                                      | <ul style="list-style-type: none"> <li>0 Never or rarely</li> <li>1 Sometimes</li> <li>2 Often</li> <li>3 Most of the time</li> <li>4 Always</li> </ul> | The sensation of anal                                                                                                                                                                             |

|                                                                                                                                                                                                                                                                                                                                              |                                                                                          |                                                                                                                                                                                                                                                                                                                                              |                                                                                                                                                             |                                                                                                                                                                                                                                                                                                                                                                                      |
|----------------------------------------------------------------------------------------------------------------------------------------------------------------------------------------------------------------------------------------------------------------------------------------------------------------------------------------------|------------------------------------------------------------------------------------------|----------------------------------------------------------------------------------------------------------------------------------------------------------------------------------------------------------------------------------------------------------------------------------------------------------------------------------------------|-------------------------------------------------------------------------------------------------------------------------------------------------------------|--------------------------------------------------------------------------------------------------------------------------------------------------------------------------------------------------------------------------------------------------------------------------------------------------------------------------------------------------------------------------------------|
| <p>you have a sensation that the stool could not be passed, (i.e., blocked), when having a bowel movement?</p>                                                                                                                                                                                                                               | <p>1 Sometimes<br/>2 Often<br/>3 Most of the time<br/>4 Always</p>                       | <p>have a sensation that the stool could not be passed, (i.e., blocked), when having a bowel movement?</p>                                                                                                                                                                                                                                   | <p>1 Sometimes<br/>2 Often<br/>3 Most of the time<br/>4 Always</p>                                                                                          | <p>blockage was considered to pose difficulty for interpretation by patients, and was thought to be ambiguous because of some overlap with the question on incomplete evacuation; questions were added to provide additional descriptions to allow us to understand what patients are reporting.</p>                                                                                 |
| <p>57<br/>In the last 3 months, how often did you press on or around your bottom or remove stool in order to complete a bowel movement?</p>                                                                                                                                                                                                  | <p>0 Never or rarely<br/>1 Sometimes<br/>2 Often<br/>3 Most of the time<br/>4 Always</p> | <p>a. Did you have difficulty passing stool because it was</p> <p>b. Did you have difficulty passing stool because</p> <p>In the last 3 months, how often did you press on or around your bottom or remove stool in order to complete a bowel movement?</p>                                                                                  | <p>1 No urge<br/>2 Weak push<br/>3 Able to push but gets stuck</p> <p>0 Never or rarely<br/>1 Sometimes<br/>2 Often<br/>3 Most of the time<br/>4 Always</p> | <p>Digital manoeuvre to remove stool was considered to be ambiguous as the phrase 'pressing around your bottom' sounded more like prodding the buttock then inserting a finger. Furthermore, socio-cultural taboo could influence how some patients choose to report this symptom; therefore, questions were added to provide alternative modes of effecting the same manoeuvre.</p> |
| <p>a. In the last 3 months, did you have to insert your finger to remove stool?</p> <p>b. In the last 3 months, did you have to flush with water to remove stool?</p> <p>c. In the last 3 months, did you have to insert a suppository to remove stool?</p> <p>d. In the last 3 months, did you have to insert an enema to remove stool?</p> | <p>0 No<br/>1 Yes</p> <p>0 No<br/>1 Yes</p> <p>0 No<br/>1 Yes</p> <p>0 No<br/>1 Yes</p>  | <p>a. In the last 3 months, did you have to insert your finger to remove stool?</p> <p>b. In the last 3 months, did you have to flush with water to remove stool?</p> <p>c. In the last 3 months, did you have to insert a suppository to remove stool?</p> <p>d. In the last 3 months, did you have to insert an enema to remove stool?</p> | <p>0 No<br/>1 Yes</p> <p>0 No<br/>1 Yes</p> <p>0 No<br/>1 Yes</p> <p>0 No<br/>1 Yes</p>                                                                     | <p>to report this symptom; therefore, questions were added to provide alternative modes of effecting the same manoeuvre.</p>                                                                                                                                                                                                                                                         |

In the last 3 months, were at least three-fourths (3/4) of your stools loose, mushy or watery?

- 0 No
- 1 Yes

In the last 3 months, were at least three-fourths (3/4) of your stools loose, mushy or watery?

- 0 No
- 1 Yes
- 2 Difficult to decide

Extended to incorporate questions that would allow us to study the patient's perception of their bowel habit and their perception of what constitutes hard and soft stool. A pictorial diagram of the Bristol stool scale was included to overcome ambiguity arising from verbal descriptors.

**\*Following questions (62a to 62g) should be answered by all subjects.**

- a. How do you feel about your bowel habit?
  - 1 Constipated
  - 2 Diarrhoea
  - 3 Sometimes constipation and sometimes diarrhoea
  - 4 None of the above

b. What is your average stool frequency per week? \_\_\_\_\_ no./week

\*c. Indicate the type of stool you usually pass when you are well

BSS no. \_\_\_\_\_

\*d. Indicate the type of stool you usually pass when you are constipated

BSS no. \_\_\_\_\_

\*e. Indicate the type of stool you usually pass when you have diarrhoea

BSS no. \_\_\_\_\_

\*f. Indicate the type of stool you usually pass most of the time

BSS no. \_\_\_\_\_

\*g. Indicate the type of stool you usually pass when you feel the worse

BSS no. \_\_\_\_\_

| Bristol Stool Scale Form (BSS)                                                      |                                                      |
|-------------------------------------------------------------------------------------|------------------------------------------------------|
|    | 1<br>Separate hard lumps, like nuts, hard to pass    |
|    | 2<br>Sausage-shaped but lumpy                        |
|   | 3<br>Like sausage but with cracks on its surface     |
|  | 4<br>Like sausage or snake, smooth & soft            |
|  | 5<br>Soft blobs with clear cut edges (passed easily) |
|  | 6<br>Fluffy pieces with ragged edges, a mushy stool  |
|  | 7<br>Watery, no solid pieces                         |
| <b>ENTIRELY LIQUID</b>                                                              |                                                      |

\*refer to Bristol Stool Scale Form

diagram and fill in the space given with the appropriate number

- 63 In the last 3 months, how often did you have to rush to the toilet to have a bowel movement?
- 0 Never or rarely
  - 1 Sometimes
  - 2 Often
  - 3 Most of the time
  - 4 Always
- Enquired about urgency to have a bowel movement, was considered to be a distressing symptom that patients frequently consulted us for. We felt that this was a key symptom of IBS that has received little attention in research. Therefore, questions were added to define its association with meals and anxiety.
- 0 Never or rarely  
1 Sometimes  
2 Often  
3 Most of the time  
4 Always
- 66 In the last 3 months, how often did you have bloating or distension?
- 0 Never →→→→ **Skip to question 68**
  - 1 Less than one day a month
  - 2 One day a month
  - 3 Two to three days a month
  - 4 One day a week
  - 5 More than one day a week
  - 6 Every day
- Enquired about bloating, which we consider to be a key symptom of IBS among our patients. Questions were added to determine the frequency of an association of bloating with IBS characteristics.
- 0 Never →→→→ **Skip to question 68**  
1 Less than one day a month  
2 One day a month  
3 Two to three days a month  
4 One day a week  
5 More than one day a week  
6 Every day
- a. When does this occur?
- 1 After a meal
  - 2 When you feel full or bloated
  - 3 When you have epigastric pain
  - 4 When you are anxious or stressed
- When you have epigastric pain
- b. How do you define the severity?
- 1 Very mild
  - 2 Mild
  - 3 Moderate
  - 4 Severe
  - 5 Very severe
- 1 Very mild  
2 Mild  
3 Moderate  
4 Severe  
5 Very severe

a. Indicate in the diagram on the right, the location of this bloating or distension. If you have more than one location, just indicate the one that bothers you the most.

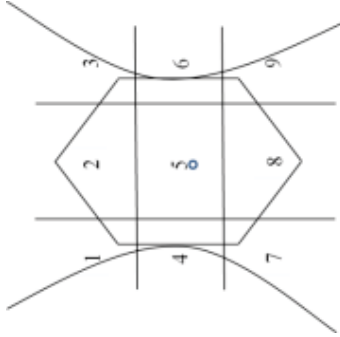

b. Was this bloating or distension relieved with defecation?

- 0 No
- 1 Yes

c. Was this bloating or distension associated with more frequent or less frequent stool?

- 0 No
- 1 Yes

d. Was this bloating or distension associated with harder or softer stool?

- 0 No
- 1 Yes

68 In the last 6 months, how often did you have steady pain in the middle or right side of your upper abdomen?

- 0 Never →→→ **Skip to question 75**
- 1 Less than one day a month
- 2 One day a month
- 3 Two to three days a month
- 4 One day a week
- 5 More than one day a week
- 6 Every day

68. In the last 6 months, how often did you have steady pain in the middle or right side of your upper abdomen?

- 0 No
- 1 Yes
- 0 Never →→→ **Skip to question 75**
- 1 Less than one day a month
- 2 One day a month
- 3 Two to three days a month
- 4 One day a week
- 5 More than one day a week
- 6 Every day

Refers to pain in the right upper quadrant; as the verbal description was ambiguous, a diagram was included to allow patients to point exactly to the site of their pain.

- a. Indicate in the diagram on the right, the location of this pain. If you have more than one location, just indicate the one that bothers you the most.

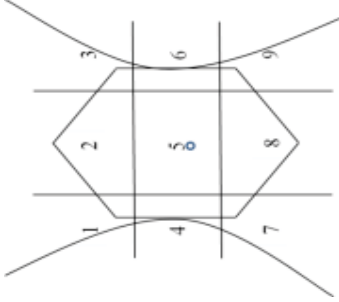

R3DQ Q No. refers to the question number as listed in the original R3DQ.
